# Supplementary material for: Visible-light-promoted catalyst-/additive-free synthesis of aroylated heterocycles in a sustainable solvent
Source: Royal Society of Chemistry journal article supplement (doi:10.1039/d1gc04218a), 2022-01-01
Supplement: d1gc04218a1.pdf [file d1gc04218a1.pdf]

## Supporting Information

### Visible-light-promoted catalyst-/additive-free synthesis of aroylated heterocycles in sustainable solvent

Fan-Lin Zeng, Kun-Chen Xie, Yu-Ting Liu, He Wang, Peng-Cheng Yin, Ling-Bo Qu, Xiao-Lan Chen,\* and Bing Yu\*

*Green Catalysis Center, College of Chemistry, Zhengzhou University, Zhengzhou 450001, China. E-mail: bingyu@zzu.edu.cn*

### Table of Contents

|                                                   |            |
|---------------------------------------------------|------------|
| <b>1. General Information.....</b>                | <b>S2</b>  |
| <b>2. Experimental Procedures.....</b>            | <b>S3</b>  |
| <b>3. Characterization Data for Products.....</b> | <b>S8</b>  |
| <b>4. NMR Copies of Products.....</b>             | <b>S27</b> |
| <b>5. Reference.....</b>                          | <b>S89</b> |

## 1. General Information

### 1.1 Materials and instruments

All commercially available reagents were used directly without further purification. All reactions were monitored by Thin Layer Chromatography (TLC) using silica gel F254 plates. Products were purified by column chromatography using 200-300 mesh silica gel as the stationary phase. All the  $^1\text{H}$ ,  $^{13}\text{C}$ , and  $^{19}\text{F}$  NMR spectra were recorded on Bruker Avance 400 or 600 spectrometers. All NMR spectra were recorded in  $\text{CDCl}_3$  at room temperature ( $20 \pm 2$  °C). Proton chemical shifts  $\delta$  were given in ppm using TMS as the internal standard. High-resolution mass spectra (HRMS) were obtained with a 3000-mass spectrometer, using Waters Q-ToF MS/MS system with the ESI technique. The reactants involved are prepared by references.<sup>8</sup>

### 1.2 The spectrum of our lamp and the visible-light irradiation instrument.

The photochemical reaction was carried out under visible light irradiation by a blue LED at 25 °C. RLH-18 8-position Photo Reaction System manufactured by Beijing Roger Tech Ltd. was used in this system. Eight 10 W blue LEDs were equipped in this Photo reactor. The blue LED'S energy peak wavelength is 458 nm, peak width at half-height is 23.4 nm, irradiance@10 W is 188.65 mW/cm<sup>2</sup>. The reaction vessel is a borosilicate glass tube with 1.5 cm from the lamp, and no filter is applied.

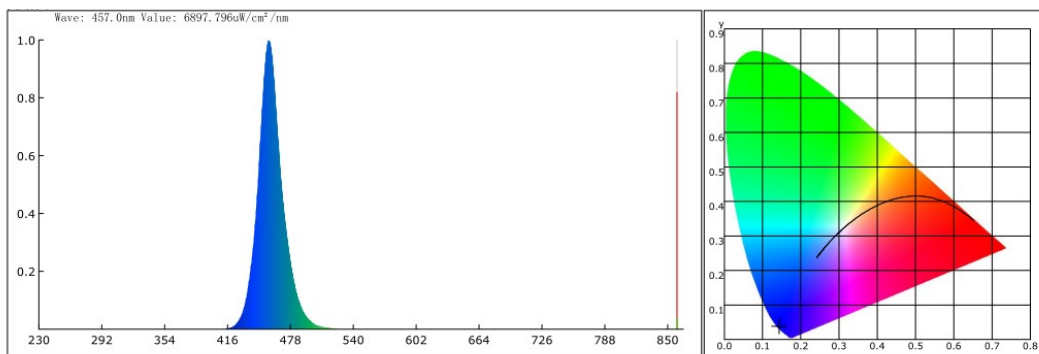

Figure S1a. The spectrum of our lamp (blue LED)

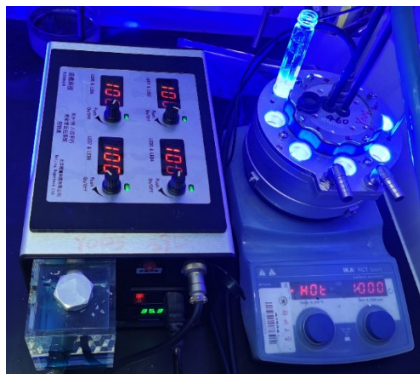

Figure S1b. The visible-light irradiation instrument

## 2. Experimental procedures

### 2.1 The gram-scale synthesis and application under the sunlight

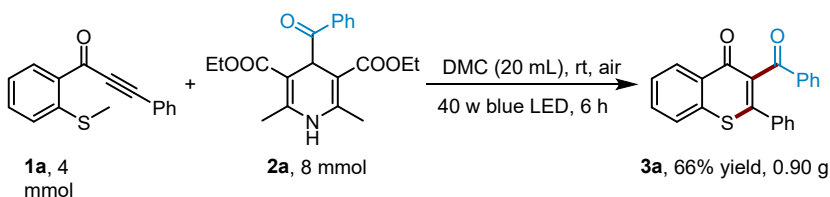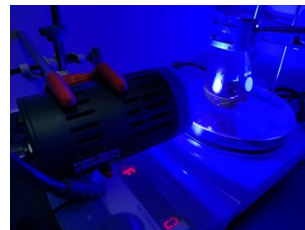

Scheme S1. The gram-scale synthesis of **3a**

The gram-scale synthesis of **3a** with 40 W Kessil blue lamp (456 nm) irradiation in air atmosphere: **1a** (4 mmol), **2a** (8 mmol) in DMC (20 mL) at room temperature for 6 h. The isolated yield of **3a** (66%, 0.90 g) was given. The reaction vessel was a borosilicate glass bottle 5 cm away from the lamp.

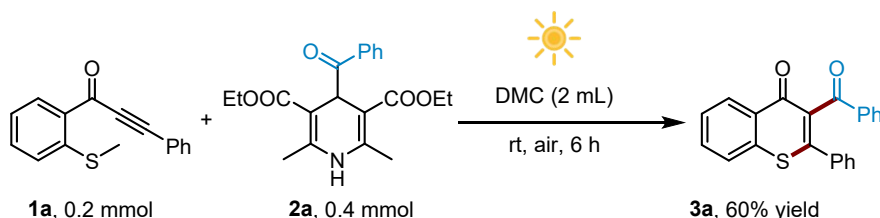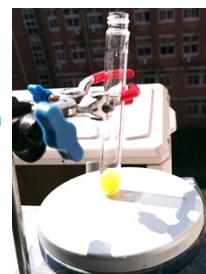

Scheme S2. The synthesis of **3a** under the sunlight

The synthesis under the sunlight: A 25 mL reaction tube was charged with **1a** (0.2 mmol), **2a** (0.4 mmol) in DMC (2 mL) at room temperature under air, then the reaction system was irradiated under sunlight for 6 h (from 10:00 to 16:00; 2021/09/20. Zhengzhou, Henan province, China. Temperature: 19 °C – 29 °C). The isolated yield of **3a** (60%) was given.

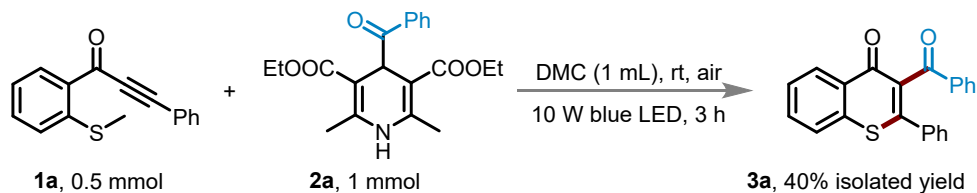

Scheme S3. The reaction at 0.5 M concentration.

## 2.2 Sensitivity assessment of this reaction.

Table S1. Sensitivity assessment of this reaction

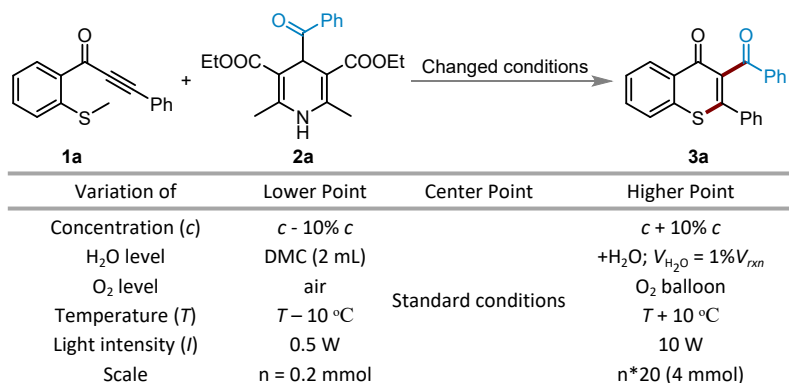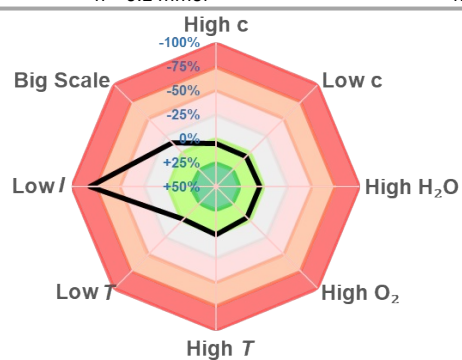

## 2.3 HRMS data analysis

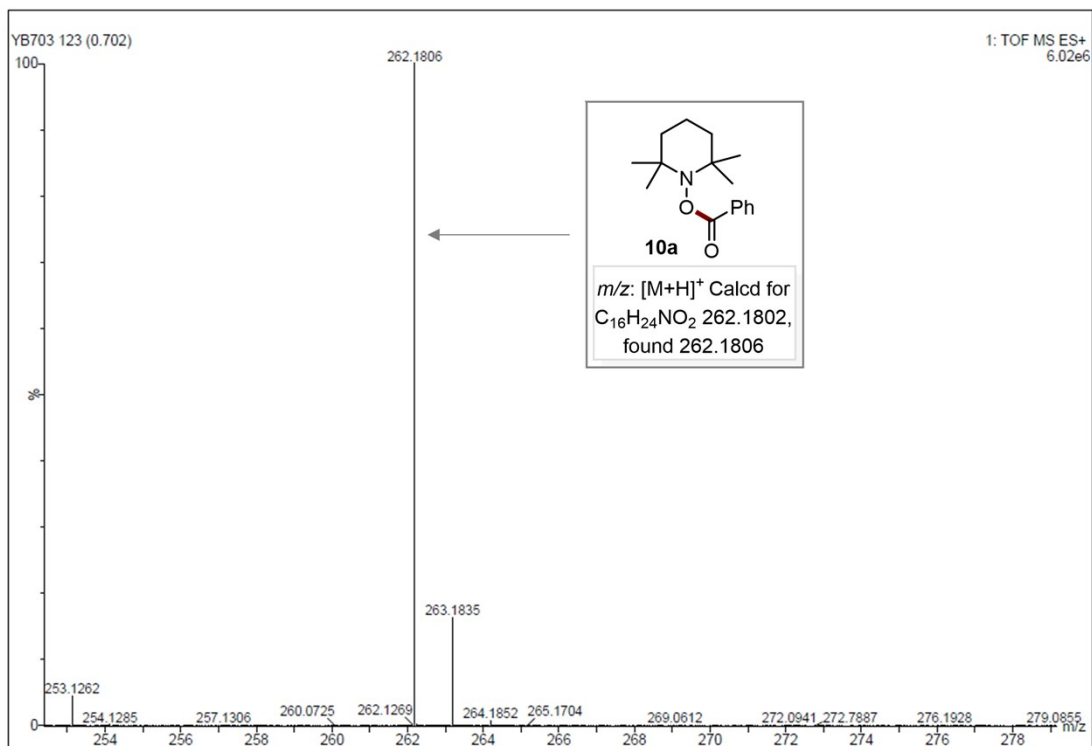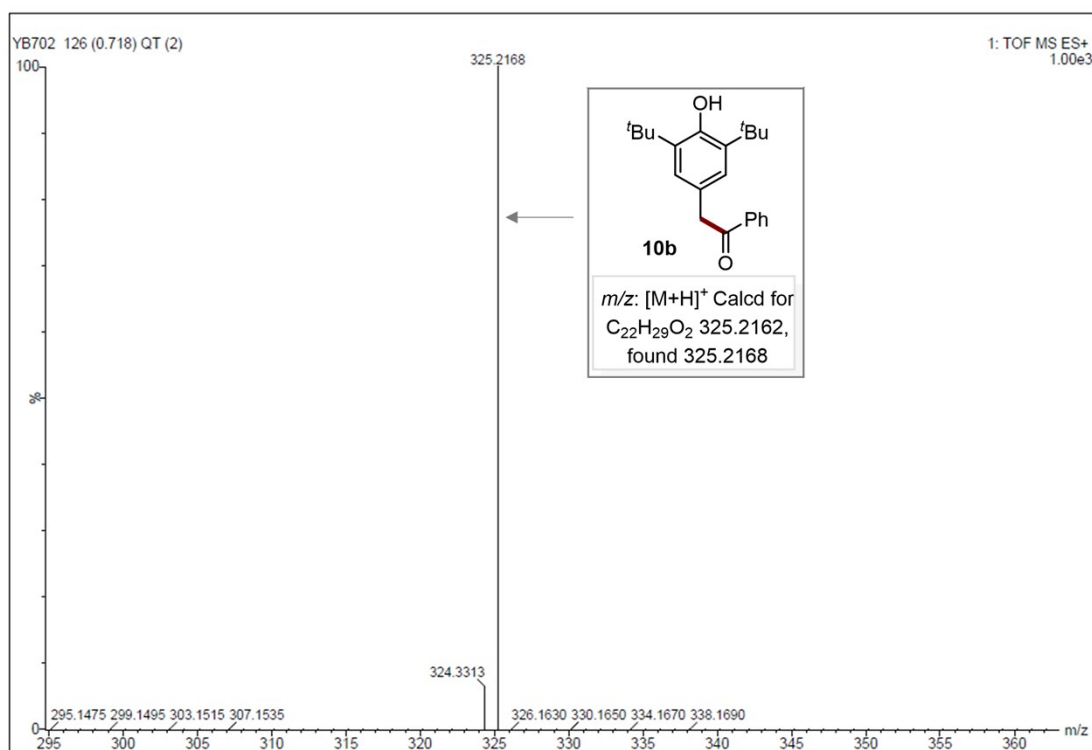

Figure S2i. HRMS data analysis of **10a-b**

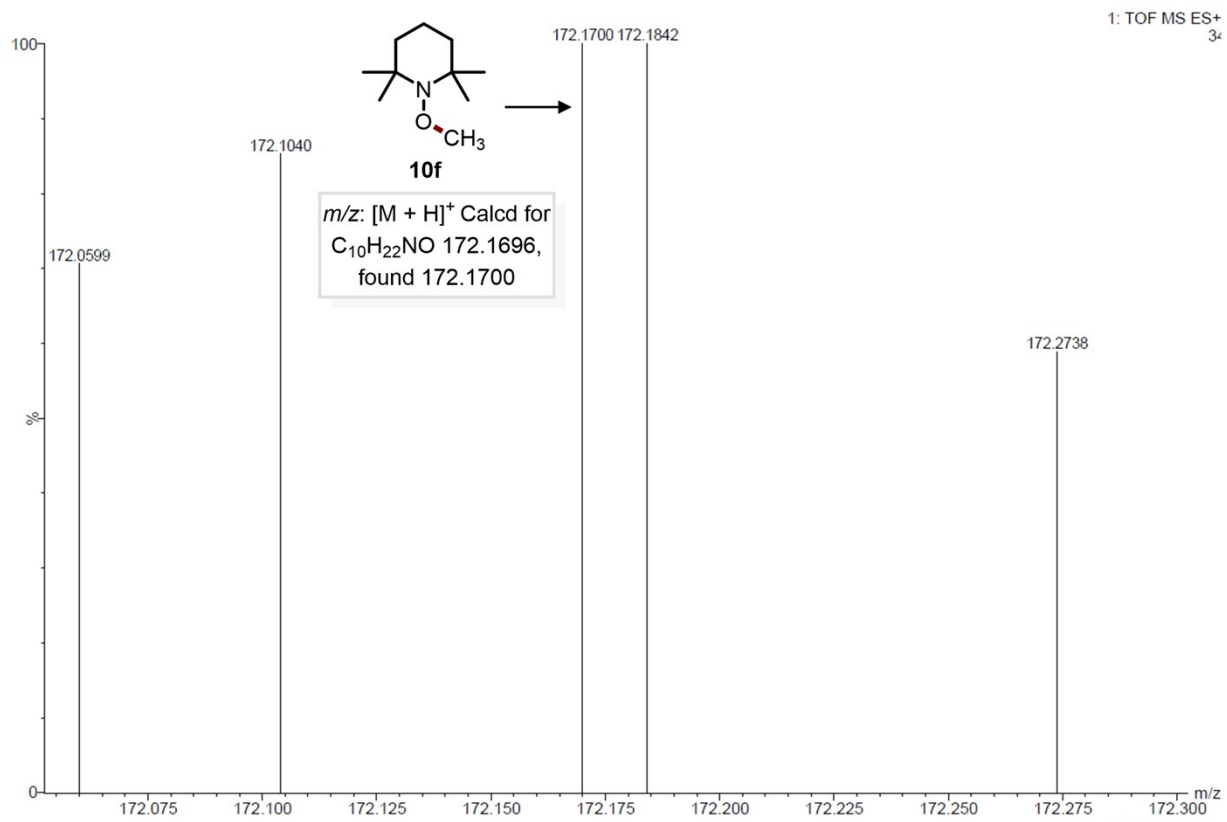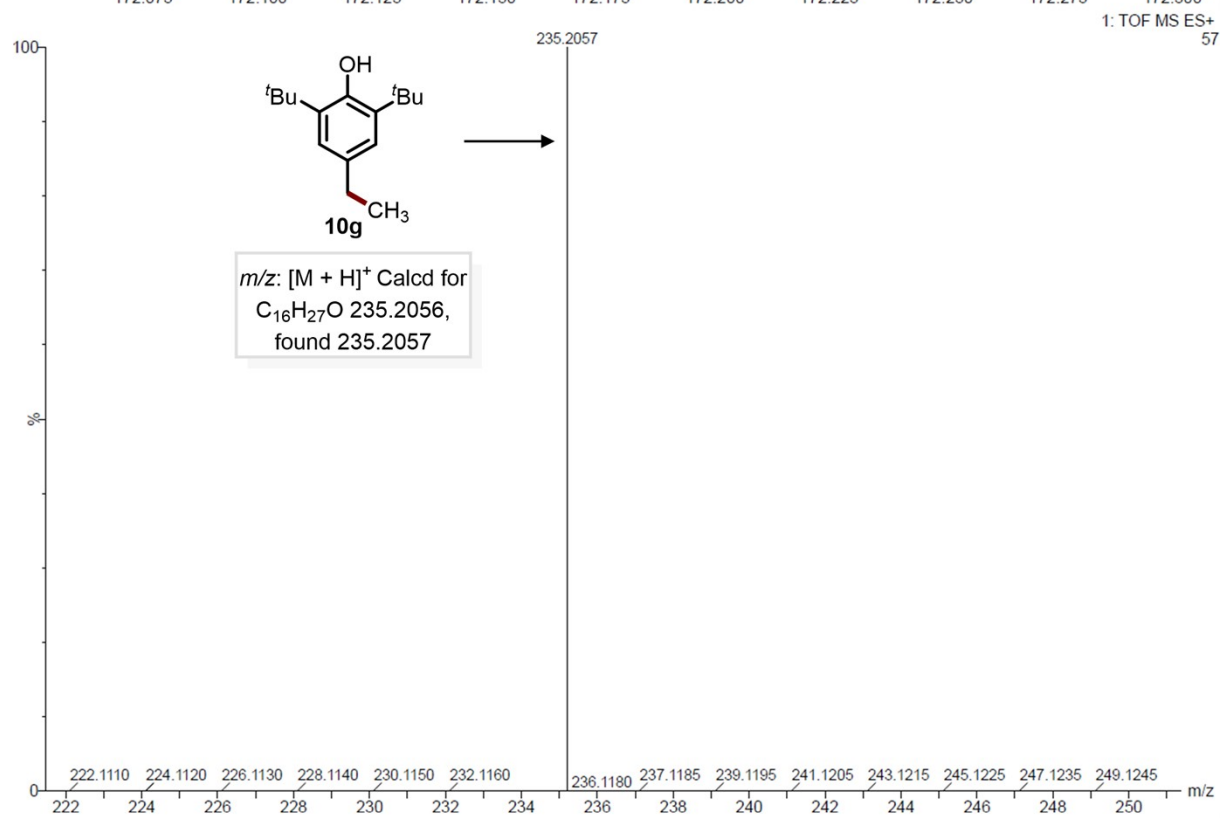

Figure S2ii. HRMS data analysis of **10f-g**

## 2.4 The UV-Vis and Fluorescence quenching experiments

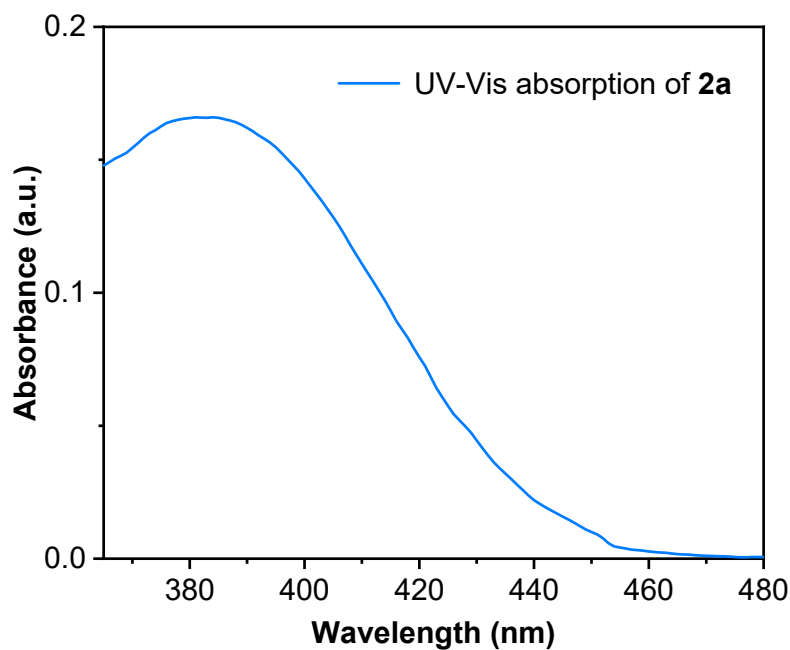

Figure S3. The UV-Vis experiment of **2a** ( $10^{-4}$  M) in MeCN.

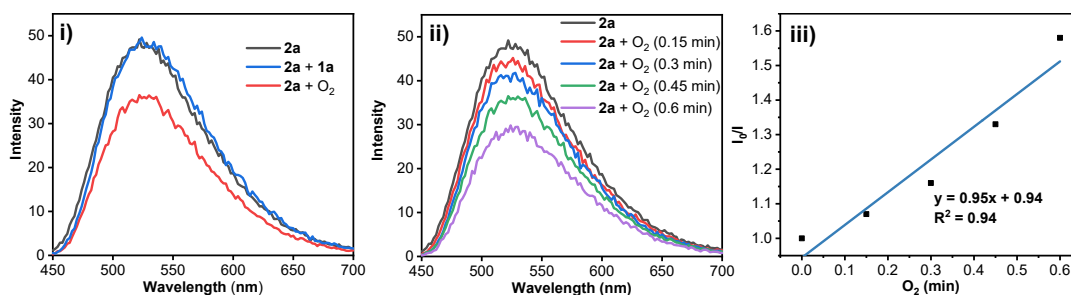

Figure S4. Fluorescence quenching experiments: i) The fluorescence quenching of **1a** and  $O_2$ ; ii) The fluorescence quenching of a 12.5 mM solution of **2a** with the change of the time of  $O_2$  bubbling ( $O_2$  is bubbled through a balloon with a needle without external pressure.) in degassed anhydrous DMC excited at 380 nm; iii) The linear relationship between  $I_0/I$  ( $I_0$  and  $I$  are the fluorescence intensities before and after the increasing the concentration of  $O_2$ , respectively) and the time for  $O_2$  to be bubbled into the solvent.

### 3. Characterization Data for Products

#### *3-benzoyl-2-phenyl-4H-thiochromen-4-one (3a)*<sup>1</sup>

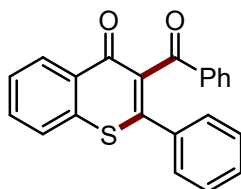

White solid (58.8 mg, 86% yield), <sup>1</sup>H NMR (400 MHz, Chloroform-*d*) δ 8.54 (d, *J* = 8.0 Hz, 1H), 7.83 – 7.76 (m, 2H), 7.72 – 7.65 (m, 2H), 7.61 – 7.57 (m, 1H), 7.50 – 7.41 (m, 3H), 7.38 – 7.27 (m, 5H). <sup>13</sup>C NMR (101 MHz, Chloroform-*d*) δ 194.8, 178.9, 152.1, 137.5, 137.0, 135.2, 134.7, 133.4, 132.1, 130.7, 130.3, 129.2, 129.1, 128.8, 128.59, 128.57, 128.1, 126.1.

#### *3-benzoyl-2-(4-methoxyphenyl)-4H-thiochromen-4-one (3b)*<sup>1</sup>

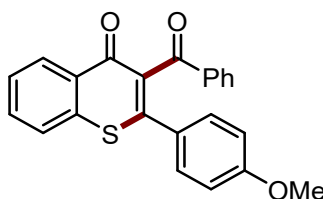

White solid (55.0 mg, 74% yield), <sup>1</sup>H NMR (400 MHz, Chloroform-*d*) δ 8.53 (d, *J* = 8.0 Hz, 1H), 7.86 – 7.78 (m, 2H), 7.71 – 7.64 (m, 2H), 7.59 – 7.55 (m, 1H), 7.48 – 7.46 (m, 1H), 7.42 – 7.32 (m, 4H), 6.81 (d, *J* = 8.8 Hz, 2H), 3.76 (s, 3H). <sup>13</sup>C NMR (101 MHz, Chloroform-*d*) δ 195.1, 178.9, 161.2, 152.0, 137.6, 137.0, 134.8, 133.4, 132.0, 130.6, 130.1, 129.2, 129.1, 128.6, 128.0, 127.0, 126.0, 114.3, 55.3.

#### *3-benzoyl-2-(4-(tert-butyl)phenyl)-4H-thiochromen-4-one (3c)*<sup>2</sup>

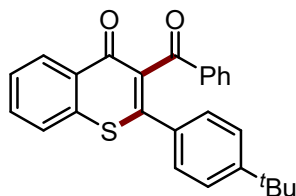

Yellow solid (47.8 mg, 60% yield), <sup>1</sup>H NMR (400 MHz, Chloroform-*d*) δ 8.54 – 8.52 (m, 1H), 7.84 – 7.78 (m, 2H), 7.70 – 7.64 (m, 2H), 7.60 – 7.56 (m, 1H), 7.50 – 7.46 (m, 1H), 7.38 – 7.33 (m, 4H), 7.32 – 7.28 (m, 2H), 1.25 (s, 9H). <sup>13</sup>C NMR (101 MHz, Chloroform-*d*) δ 195.0, 179.0, 153.7, 152.5, 137.7, 137.3, 135.0, 133.3, 132.0, 131.9, 130.7, 129.14, 129.06, 128.5, 128.3, 128.0, 126.0, 125.8, 34.8, 31.1.

#### *2-([1,1'-biphenyl]-4-yl)-3-benzoyl-4H-thiochromen-4-one (3d)*<sup>4</sup>



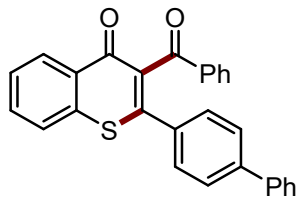

White solid (79.4 mg, 95% yield),  $^1\text{H}$  NMR (400 MHz, Chloroform-*d*)  $\delta$  8.56 – 8.53 (m, 1H), 7.84 (dd,  $J = 8.3, 1.4$  Hz, 2H), 7.72 – 7.67 (m, 2H), 7.61 – 7.58 (m, 1H), 7.54 – 7.45 (m, 7H), 7.43 – 7.32 (m, 5H).  $^{13}\text{C}$  NMR (101 MHz, Chloroform-*d*)  $\delta$  194.9, 178.9, 151.9, 143.1, 139.6, 137.5, 137.1, 135.2, 133.6, 133.5, 132.1, 130.7, 129.2, 129.10, 129.06, 128.9, 128.6, 128.2, 128.0, 127.4, 127.1, 126.1.

**3-benzoyl-2-(4-fluorophenyl)-4H-thiophen-4-one (3e)<sup>2</sup>**

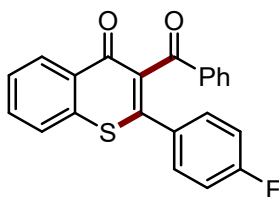

Yellow solid (48.2 mg, 67% yield),  $^1\text{H}$  NMR (400 MHz, Chloroform-*d*)  $\delta$  8.54 (d,  $J = 7.6$  Hz, 1H), 7.83 – 7.75 (m, 2H), 7.72 – 7.65 (m, 2H), 7.61 – 7.57 (m, 1H), 7.52 – 7.46 (m, 1H), 7.45 – 7.39 (m, 2H), 7.38 – 7.34 (m, 2H), 7.03 – 6.94 (m, 2H).  $^{13}\text{C}$  NMR (101 MHz, Chloroform-*d*)  $\delta$  194.7, 178.8, 163.7 (d,  $^1J_{\text{C-F}} = 251.8$  Hz), 150.8, 137.3, 136.9, 135.5, 133.6, 132.2, 130.80, 130.75, 130.7, 130.6, 129.1 (d,  $^3J_{\text{C-F}} = 1.8$  Hz), 128.7, 128.2, 126.1, 116.0 (d,  $^2J_{\text{C-F}} = 22.1$  Hz).  $^{19}\text{F}$  NMR (376 MHz, Chloroform-*d*)  $\delta$  -109.38.

**3-benzoyl-2-(4-bromophenyl)-4H-thiophen-4-one (3f)**

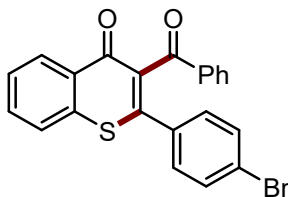

Yellow solid (47.0 mg, 56% yield), mp 148.4 – 150.3 °C,  $^1\text{H}$  NMR (400 MHz, Chloroform-*d*)  $\delta$  8.53 (d,  $J = 7.9$  Hz, 1H), 7.82 – 7.78 (m, 2H), 7.72 – 7.65 (m, 2H), 7.61 – 7.57 (m, 1H), 7.52 – 7.47 (m, 1H), 7.46 – 7.42 (m, 2H), 7.37 (t,  $J = 7.8$  Hz, 2H), 7.33 – 7.29 (m, 2H).  $^{13}\text{C}$  NMR (101 MHz, Chloroform-*d*)  $\delta$  194.5, 178.8, 150.6, 137.2, 136.8, 135.5, 133.7, 133.6, 132.2, 132.1, 130.6, 130.1, 129.1, 128.7, 128.3, 126.1, 125.0. HRMS (ESI-TOF)  $m/z$ :  $[\text{M} + \text{H}]^+$  Calcd for  $\text{C}_{22}\text{H}_{14}\text{BrO}_2\text{S}$ , 420.9892, Found: 420.9897.

**3-benzoyl-2-(3-methoxyphenyl)-4H-thiophen-4-one (3g)**

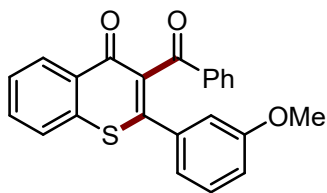

Colorless oil (53.5 mg, 72% yield),  $^1\text{H}$  NMR (400 MHz, Chloroform-*d*)  $\delta$  8.53 (d,  $J = 1.1$  Hz, 1H), 7.90 – 7.77 (m, 2H), 7.72 – 7.63 (m, 2H), 7.61 – 7.56 (m, 1H), 7.52 – 7.45 (m, 1H), 7.37 (t,  $J = 7.6$  Hz, 2H), 7.20 (t,  $J = 8.0$  Hz, 1H), 7.03 – 7.00 (m, 1H), 6.94 (t,  $J = 2.0$  Hz, 1H), 6.88 – 6.85 (m, 1H), 3.63 (s, 3H).  $^{13}\text{C}$  NMR (101 MHz, Chloroform-*d*)  $\delta$  194.8, 178.9, 159.5, 151.9, 137.5, 137.1, 135.9, 135.2, 133.4, 132.1, 130.7, 129.9, 129.2, 129.1, 128.6, 128.1, 126.1, 120.9, 116.7, 113.6, 55.2. HRMS (ESI-TOF)  $m/z$ :  $[\text{M} + \text{H}]^+$  Calcd for  $\text{C}_{23}\text{H}_{17}\text{O}_3\text{S}$ , 373.0893, Found: 373.0897.

**3-benzoyl-2-(3-bromophenyl)-4H-thiophen-4-one (3h)**

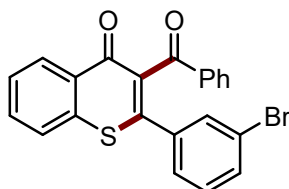

White solid (58.5 mg, 70% yield), mp 139.8 – 141.7 °C,  $^1\text{H}$  NMR (400 MHz, Chloroform-*d*)  $\delta$  8.53 (d,  $J = 6.7$  Hz, 1H), 7.83 – 7.74 (m, 2H), 7.73 – 7.64 (m, 2H), 7.63 – 7.55 (m, 2H), 7.52 – 7.43 (m, 2H), 7.39 – 7.33 (m, 3H), 7.15 (t,  $J = 7.9$  Hz, 1H).  $^{13}\text{C}$  NMR (101 MHz, Chloroform-*d*)  $\delta$  194.3, 178.7, 150.0, 137.2, 136.9, 136.5, 135.7, 133.6, 133.3, 132.3, 131.4, 130.6, 130.2, 129.13, 129.11, 128.7, 128.3, 127.3, 126.1, 122.7. HRMS (ESI-TOF)  $m/z$ :  $[\text{M} + \text{H}]^+$  Calcd for  $\text{C}_{22}\text{H}_{14}\text{BrO}_2\text{S}$ , 420.9892, Found: 420.9897.

**3-benzoyl-4',4'-dimethyl-3',4'-dihydro-2'H,4H-[2,6'-bithiophen]-4-one (3i)**

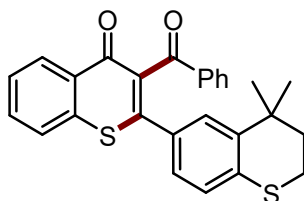

Yellow solid (50.6 mg, 60% yield), mp 163.2 – 165.2 °C,  $^1\text{H}$  NMR (400 MHz, Chloroform-*d*)  $\delta$  8.52 (d,  $J = 8.1$  Hz, 1H), 7.88 – 7.83 (m, 2H), 7.70 – 7.64 (m, 2H), 7.58 – 7.54 (m, 1H), 7.51 – 7.47 (m, 1H), 7.40 – 7.34 (m, 3H), 7.13 (dd,  $J = 8.2, 2.1$  Hz, 1H), 7.02 (d,  $J = 8.2$  Hz, 1H), 2.98 – 2.92 (m, 2H), 1.87 – 1.80 (m, 2H), 1.07 (s, 6H).  $^{13}\text{C}$  NMR (101 MHz, Chloroform-*d*)  $\delta$  195.0, 179.0, 152.4, 142.3, 137.5, 137.1, 135.9, 134.7, 133.4, 132.0, 130.6, 130.4, 129.3, 129.0, 128.6, 128.0, 127.0, 126.9, 126.1, 125.6, 36.9, 32.9, 29.6, 23.1. HRMS (ESI-TOF)  $m/z$ :  $[\text{M} + \text{H}]^+$  Calcd for  $\text{C}_{27}\text{H}_{23}\text{O}_2\text{S}_2$ , 443.1134, Found: 443.1141.

**3-benzoyl-2-(thiophen-3-yl)-4H-thiophen-4-one (3j)<sup>2</sup>**

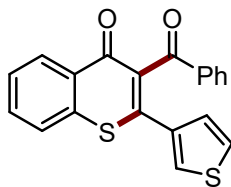

White solid (33.4 mg, 48% yield),  $^1\text{H}$  NMR (400 MHz, Chloroform-*d*)  $\delta$  8.53 – 8.48 (m, 1H), 7.88 – 7.82 (m, 2H), 7.70 – 7.64 (m, 2H), 7.60 – 7.53 (m, 2H), 7.52 – 7.46 (m, 1H), 7.41 – 7.34 (m, 2H), 7.28 – 7.26 (m, 1H), 7.17 (dd,  $J$  = 5.1, 1.4 Hz, 1H).  $^{13}\text{C}$  NMR (101 MHz, Chloroform-*d*)  $\delta$  195.4, 179.1, 146.0, 137.2, 136.7, 135.0, 134.3, 133.6, 132.1, 130.6, 129.1, 129.0, 128.7, 128.1, 127.7, 127.4, 127.2, 126.0.

**3-(4-methylbenzoyl)-2-phenyl-4H-thiophen-4-one (3k)<sup>1</sup>**

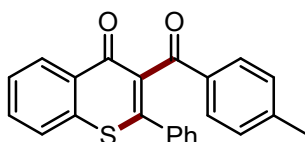

White solid (58.4 mg, 82% yield),  $^1\text{H}$  NMR (400 MHz, Chloroform-*d*)  $\delta$  8.57 – 8.49 (m, 1H), 7.73 – 7.64 (m, 4H), 7.59 – 7.55 (m, 1H), 7.46 – 7.41 (m, 2H), 7.36 – 7.27 (m, 3H), 7.14 (d,  $J$  = 8.0 Hz, 2H), 2.33 (s, 3H).  $^{13}\text{C}$  NMR (101 MHz, Chloroform-*d*)  $\delta$  194.2, 178.8, 151.7, 144.3, 137.5, 135.5, 134.9, 134.7, 132.0, 130.7, 130.2, 129.3, 129.1, 128.7, 128.6, 128.0, 126.0, 21.7.

**3-(4-(tert-butyl)benzoyl)-2-phenyl-4H-thiophen-4-one (3l)**

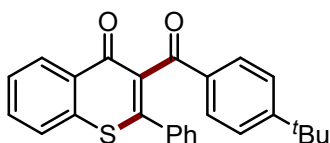

White solid (59.7 mg, 75% yield), mp 179.1 – 180.8 °C,  $^1\text{H}$  NMR (400 MHz, Chloroform-*d*)  $\delta$  8.54 (dd,  $J$  = 8.3, 4.5 Hz, 1H), 7.81 – 7.64 (m, 4H), 7.61 – 7.56 (m, 1H), 7.48 – 7.44 (m, 2H), 7.39 – 7.27 (m, 5H), 1.28 (s, 9H).  $^{13}\text{C}$  NMR (101 MHz, Chloroform-*d*)  $\delta$  194.3, 178.9, 157.1, 151.8, 137.6, 135.5, 134.9, 134.5, 132.0, 130.7, 130.2, 129.1, 128.7, 128.6, 128.0, 126.0, 125.6, 35.1, 31.0. HRMS (ESI-TOF)  $m/z$ :  $[\text{M} + \text{H}]^+$  Calcd for  $\text{C}_{26}\text{H}_{23}\text{O}_2\text{S}$ , 399.1413, Found: 399.1415.

**3-(4-fluorobenzoyl)-2-phenyl-4H-thiophen-4-one (3m)<sup>1</sup>**

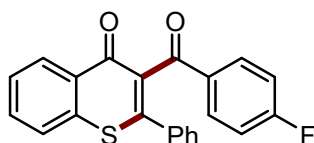

White solid (40.3 mg, 56% yield),  $^1\text{H}$  NMR (400 MHz, Chloroform-*d*)  $\delta$  8.54 (d,  $J$  = 8.1 Hz, 1H), 7.86 – 7.78 (m, 2H), 7.69 (d,  $J$  = 7.2 Hz, 2H), 7.62 – 7.57 (m, 1H), 7.43 – 7.28 (m, 5H), 7.01 (t,  $J$  = 8.1 Hz, 2H).  $^{13}\text{C}$  NMR (101 MHz, Chloroform-*d*)  $\delta$  193.2, 178.8, 165.9 (d,  $^1J_{\text{C-F}}$  = 255.5 Hz), 152.3, 137.5, 134.9, 134.6, 133.5 (d,  $^3J_{\text{C-F}}$  = 2.8 Hz), 132.2, 131.8 (d,  $^3J_{\text{C-F}}$  = 9.6 Hz), 130.6, 130.4,

129.1, 128.8, 128.5, 128.2, 126.1, 115.8 (d,  $^2J_{C-F} = 22.1$  Hz).  $^{19}\text{F}$  NMR (376 MHz, Chloroform-*d*)  $\delta$  -104.34.

**3-(4-chlorobenzoyl)-2-phenyl-4H-thiochromen-4-one (3n)<sup>1</sup>**

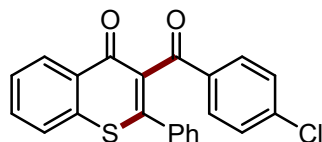

White solid (50.4 mg, 67% yield),  $^1\text{H}$  NMR (400 MHz, Chloroform-*d*)  $\delta$  8.53 (d,  $J = 7.5$  Hz, 1H), 7.76 – 7.71 (m, 2H), 7.71 – 7.65 (m, 2H), 7.60 – 7.58 (m, 1H), 7.44 – 7.39 (m, 2H), 7.36 – 7.29 (m, 5H).  $^{13}\text{C}$  NMR (101 MHz, Chloroform-*d*)  $\delta$  193.6, 178.8, 152.6, 139.9, 137.5, 135.4, 134.7, 134.6, 132.2, 130.6, 130.5, 129.1, 129.0, 128.9, 128.5, 128.3, 126.1.

**3-(4-bromobenzoyl)-2-phenyl-4H-thiochromen-4-one (3o)**

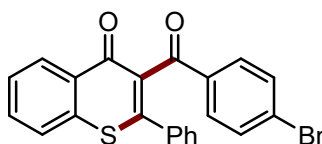

Yellow solid (50.4 mg, 60% yield), mp 159.6 – 161.6 °C,  $^1\text{H}$  NMR (400 MHz, Chloroform-*d*)  $\delta$  8.53 (d,  $J = 8.8$  Hz, 1H), 7.73 – 7.63 (m, 4H), 7.61 – 7.57 (m, 1H), 7.49 (d,  $J = 8.6$  Hz, 2H), 7.43 – 7.38 (m, 2H), 7.33 – 7.29 (m, 3H).  $^{13}\text{C}$  NMR (101 MHz, Chloroform-*d*)  $\delta$  193.8, 178.8, 152.7, 137.5, 135.8, 134.7, 134.6, 132.2, 131.9, 130.59, 130.57, 130.5, 129.1, 128.9, 128.7, 128.5, 128.3, 126.1. HRMS (ESI-TOF)  $m/z$ :  $[\text{M} + \text{H}]^+$  Calcd for  $\text{C}_{22}\text{H}_{14}\text{BrO}_2\text{S}$ , 420.9892, Found: 420.9898.

**2-phenyl-3-(4-(trifluoromethyl)benzoyl)-4H-thiochromen-4-one (3p)**

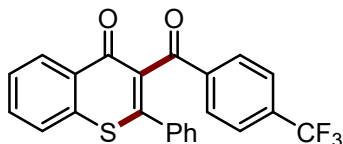

Colorless oil (46.7 mg, 57% yield),  $^1\text{H}$  NMR (400 MHz, Chloroform-*d*)  $\delta$  8.53 (d,  $J = 7.4$  Hz, 1H), 7.91 (d,  $J = 8.1$  Hz, 2H), 7.74 – 7.67 (m, 2H), 7.65 – 7.57 (m, 3H), 7.44 – 7.30 (m, 5H).  $^{13}\text{C}$  NMR (151 MHz, Chloroform-*d*)  $\delta$  193.8, 178.9, 153.3, 139.7, 137.5, 134.5 (q,  $^2J_{C-F} = 32.7$  Hz), 134.4, 132.3, 130.59, 130.57, 129.3, 129.0, 128.9, 128.5, 128.4, 126.2, 125.7 (q,  $^2J_{C-F} = 3.9$  Hz), 124.4 (q,  $^1J_{C-F} = 273.31$  Hz).  $^{19}\text{F}$  NMR (376 MHz, Chloroform-*d*)  $\delta$  -63.15. HRMS (ESI-TOF)  $m/z$ :  $[\text{M} + \text{H}]^+$  Calcd for  $\text{C}_{23}\text{H}_{14}\text{F}_3\text{O}_2\text{S}$ , 411.0661, Found: 411.0668.

**3-(2-naphthoyl)-2-phenyl-4H-thiochromen-4-one (3q)**

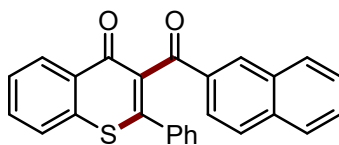

Yellow solid (54.9 mg, 70% yield), mp 162.8 – 164.8 °C, <sup>1</sup>H NMR (400 MHz, Chloroform-*d*) δ 8.56 (d, *J* = 8.5 Hz, 1H), 8.28 (s, 1H), 7.91 (dd, *J* = 8.6, 1.7 Hz, 1H), 7.88 – 7.77 (m, 3H), 7.71 (d, *J* = 3.8 Hz, 2H), 7.63 – 7.53 (m, 2H), 7.50 – 7.45 (m, 3H), 7.32 – 7.26 (m, 3H). <sup>13</sup>C NMR (151 MHz, Chloroform-*d*) δ 194.7, 178.9, 152.2, 137.6, 135.8, 135.3, 134.8, 134.5, 132.5, 132.1, 131.5, 130.7, 130.3, 129.7, 129.2, 128.8, 128.6, 128.54, 128.52, 128.2, 127.7, 126.6, 126.1, 124.3. HRMS (ESI-TOF) *m/z*: [M + H]<sup>+</sup> Calcd for C<sub>26</sub>H<sub>17</sub>O<sub>2</sub>S, 393.0944, Found: 393.0945.

**2-phenyl-3-(thiophene-2-carbonyl)-4H-thiochromen-4-one (3r)**

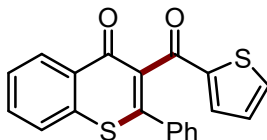

Yellow solid (62.6 mg, 90% yield), mp 149.9 – 151.8 °C, <sup>1</sup>H NMR (400 MHz, Chloroform-*d*) δ 8.56 (d, *J* = 7.6 Hz, 1H), 7.72 – 7.64 (m, 2H), 7.63 – 7.54 (m, 2H), 7.52 – 7.43 (m, 3H), 7.40 – 7.30 (m, 3H), 6.97 (dd, *J* = 4.9, 3.8 Hz, 1H). <sup>13</sup>C NMR (101 MHz, Chloroform-*d*) δ 186.5, 178.5, 152.3, 144.3, 137.3, 135.0, 134.7, 134.2, 132.1, 130.7, 130.4, 129.2, 128.8, 128.6, 128.2, 128.0, 126.1. HRMS (ESI-TOF) *m/z*: [M + H]<sup>+</sup> Calcd for C<sub>20</sub>H<sub>13</sub>O<sub>2</sub>S<sub>2</sub>, 349.0351, Found: 349.0353.

**5-methyl-5-(2-oxo-2-phenylethyl)benzo[4,5]imidazo[2,1-*a*]isoquinolin-6(5H)-one (5a)<sup>2</sup>**

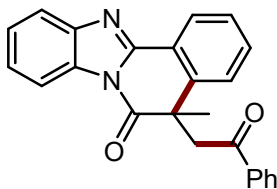

White solid (57.8 mg, 79% yield), <sup>1</sup>H NMR (400 MHz, Chloroform-*d*) δ 8.58 – 8.53 (m, 1H), 8.34 (dd, *J* = 7.5, 2.4 Hz, 1H), 7.97 – 7.73 (m, 3H), 7.57 – 7.50 (m, 1H), 7.48 – 7.37 (m, 6H), 7.35 – 7.30 (m, 1H), 4.30 (d, *J* = 18.3, 1H), 4.15 (d, *J* = 18.2, 1H), 1.72 (s, 3H). <sup>13</sup>C NMR (101 MHz, Chloroform-*d*) δ 196.1, 173.3, 150.1, 144.1, 142.0, 135.7, 133.6, 131.7, 131.6, 128.7, 128.1, 127.6, 126.4, 125.6, 125.3, 124.4, 123.1, 119.8, 115.6, 49.3, 46.2, 30.2.

**3,5-dimethyl-5-(2-oxo-2-phenylethyl)benzo[4,5]imidazo[2,1-*a*]isoquinolin-6(5H)-one (5b)<sup>2</sup>**

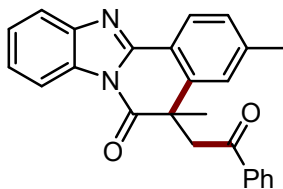

Yellow solid (59.2 mg, 78% yield), <sup>1</sup>H NMR (400 MHz, Chloroform-*d*) δ 8.43 (d, *J* = 8.0 Hz, 1H), 8.34 – 8.28 (m, 1H), 7.89 – 7.83 (m, 3H), 7.58 – 7.53 (m, 1H), 7.46 – 7.36 (m, 4H), 7.25 – 7.23 (m, 1H), 7.11 (s, 1H), 4.31 (d, *J* = 18.3 Hz, 1H), 4.12 (d, *J* = 18.3 Hz, 1H), 2.37 (s, 3H), 1.71 (s, 3H). <sup>13</sup>C NMR (101 MHz, Chloroform-*d*) δ 196.0, 173.4, 150.3, 144.2, 142.1, 142.0, 135.8,

133.6, 131.7, 128.7, 128.6, 128.1, 126.4, 125.5, 125.1, 124.9, 120.4, 119.6, 115.6, 49.3, 46.1, 30.3, 22.0.

**3-methoxy-5-methyl-5-(2-oxo-2-phenylethyl)benzo[4,5]imidazo[2,1-a]isoquinolin-6(5H)-one**  
**(5c)<sup>2</sup>**

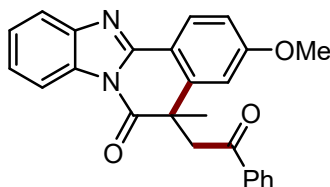

Yellow solid (59.4 mg, 75% yield), <sup>1</sup>H NMR (400 MHz, Chloroform-*d*) δ 8.50 (d, *J* = 8.7 Hz, 1H), 8.30 (d, *J* = 7.2 Hz, 1H), 7.88 – 7.80 (m, 3H), 7.53 (t, *J* = 7.4 Hz, 1H), 7.43 – 7.34 (m, 4H), 6.97 (dd, *J* = 8.8, 2.4 Hz, 1H), 6.81 (d, *J* = 2.4 Hz, 1H), 4.29 (d, *J* = 18.3 Hz, 1H), 4.08 (d, *J* = 18.2 Hz, 1H), 3.80 (s, 3H), 1.70 (s, 3H). <sup>13</sup>C NMR (101 MHz, Chloroform-*d*) δ 196.0, 173.3, 162.3, 150.2, 144.2, 144.1, 135.7, 133.6, 131.6, 128.7, 128.4, 128.1, 125.5, 124.9, 119.4, 116.0, 115.5, 112.4, 111.1, 55.5, 49.3, 46.3, 30.4.

**3-isopropyl-5-methyl-5-(2-oxo-2-phenylethyl)benzo[4,5]imidazo[2,1-a]isoquinolin-6(5H)-one**  
**(5d)<sup>2</sup>**

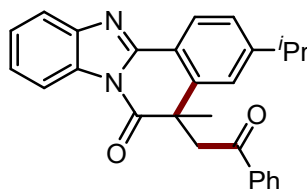

Yellow solid (62.8 mg, 77% yield), <sup>1</sup>H NMR (400 MHz, Chloroform-*d*) δ 8.45 (d, *J* = 8.1 Hz, 1H), 8.33 (dd, *J* = 7.7, 1.8 Hz, 1H), 7.87 – 7.87 (m, 3H), 7.57 – 7.52 (m, 1H), 7.45 – 7.37 (m, 4H), 7.31 (dd, *J* = 8.2, 1.6 Hz, 1H), 7.14 (d, *J* = 1.6 Hz, 1H), 4.28 (d, *J* = 18.1 Hz, 1H), 4.15 (d, *J* = 18.1 Hz, 1H), 2.94 – 2.84 (m, 1H), 1.72 (s, 3H), 1.20 (dd, *J* = 6.9, 1.8 Hz, 6H). <sup>13</sup>C NMR (101 MHz, Chloroform-*d*) δ 196.3, 173.5, 152.9, 150.3, 144.2, 141.9, 135.9, 133.6, 131.7, 128.6, 128.0, 126.5, 125.8, 125.5, 125.1, 122.5, 120.8, 119.6, 115.6, 49.2, 46.3, 34.4, 30.4, 23.8, 23.7.

**3-chloro-5-methyl-5-(2-oxo-2-phenylethyl)benzo[4,5]imidazo[2,1-a]isoquinolin-6(5H)-one**  
**(5e)<sup>2</sup>**

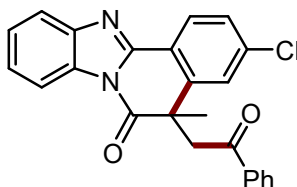

Yellow solid (52 mg, 65% yield), <sup>1</sup>H NMR (400 MHz, Chloroform-*d*) δ 8.49 (d, *J* = 8.4 Hz, 1H), 8.35 – 8.28 (m, 1H), 7.85 (dd, *J* = 8.3, 1.3 Hz, 3H), 7.58 – 7.51 (m, 1H), 7.48 – 7.39 (m, 5H), 7.30 (d, *J* = 2.0 Hz, 1H), 4.33 (d, *J* = 18.4 Hz, 1H), 4.05 (d, *J* = 18.3 Hz, 1H), 1.71 (s, 3H). <sup>13</sup>C

NMR (101 MHz, Chloroform-*d*)  $\delta$  195.9, 172.6, 149.2, 144.1, 143.7, 137.7, 135.5, 133.8, 131.6, 128.7, 128.2, 128.1, 127.8, 125.8, 125.6, 124.8, 121.8, 119.9, 115.6, 49.4, 46.2, 30.0.

**5-methyl-5-(2-oxo-2-phenylethyl)-3-(trifluoromethyl)benzo[4,5]imidazo[2,1-*a*]isoquinolin-6(5H)-one (5f)<sup>2</sup>**

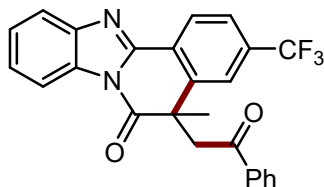

White solid (52.0 mg, 60% yield), <sup>1</sup>H NMR (400 MHz, Chloroform-*d*)  $\delta$  8.69 (d, *J* = 8.2 Hz, 1H), 8.40 – 8.28 (m, 1H), 7.95 – 7.88 (m, 1H), 7.88 – 7.80 (m, 2H), 7.70 (d, *J* = 8.3 Hz, 1H), 7.60 – 7.52 (m, 2H), 7.51 – 7.39 (m, 4H), 4.38 (d, *J* = 18.4 Hz, 1H), 4.13 (d, *J* = 18.4 Hz, 1H), 1.75 (s, 3H). <sup>13</sup>C NMR (101 MHz, Chloroform-*d*)  $\delta$  196.0, 172.4, 148.6, 144.0, 142.6, 135.4, 133.9, 133.0 (q, <sup>2</sup>*J*<sub>C-F</sub> = 32.7 Hz), 131.7, 128.7, 128.1, 127.0, 126.4, 126.1, 126.0, 124.52 (q, <sup>3</sup>*J*<sub>C-F</sub> = 3.7 Hz), 123.6 (q, <sup>1</sup>*J*<sub>C-F</sub> = 272.8 Hz), 121.45 (q, <sup>3</sup>*J*<sub>C-F</sub> = 3.9 Hz), 120.2, 115.8, 49.5, 46.4, 30.0. <sup>19</sup>F NMR (376 MHz, Chloroform-*d*)  $\delta$  -62.75.

**5-(2-(4-(*tert*-butyl)phenyl)-2-oxoethyl)-5-methylbenzo[4,5]imidazo[2,1-*a*]isoquinolin-6(5H)-one (5g)**

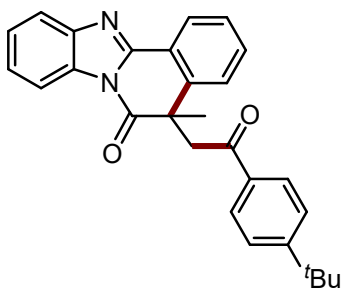

White solid (53.1 mg, 63% yield), mp 83.2 – 85.1 °C, <sup>1</sup>H NMR (400 MHz, Chloroform-*d*)  $\delta$  8.58 – 8.50 (m, 1H), 8.38 – 8.30 (m, 1H), 7.90 – 7.83 (m, 1H), 7.82 – 7.76 (m, 2H), 7.46 – 7.37 (m, 6H), 7.36 – 7.28 (m, 1H), 4.28 (d, *J* = 18.2 Hz, 1H), 4.13 (d, *J* = 18.1 Hz, 1H), 1.71 (s, 3H), 1.30 (s, 9H). <sup>13</sup>C NMR (101 MHz, Chloroform-*d*)  $\delta$  195.7, 173.3, 157.5, 150.1, 144.1, 142.1, 133.2, 131.7, 131.5, 128.0, 127.5, 126.4, 125.59, 125.57, 125.3, 124.4, 123.1, 119.8, 115.7, 49.3, 46.2, 35.2, 31.0, 30.2. HRMS (ESI-TOF) *m/z*: [M + H]<sup>+</sup> Calcd for C<sub>28</sub>H<sub>27</sub>N<sub>2</sub>O<sub>2</sub>, 423.2067, Found: 423.2071.

**5-(2-(4-chlorophenyl)-2-oxoethyl)-5-methylbenzo[4,5]imidazo[2,1-*a*]isoquinolin-6(5H)-one (5h)<sup>3</sup>**

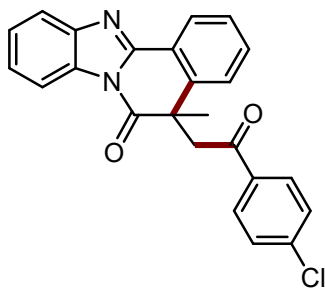

White solid (40 mg, 50% yield),  $^1\text{H}$  NMR (400 MHz, Chloroform-*d*)  $\delta$  8.59 – 8.51 (m, 1H), 8.38 – 8.28 (m, 1H), 7.89 – 7.84 (m, 1H), 7.81 – 7.75 (m, 2H), 7.48 – 7.36 (m, 6H), 7.34 – 7.28 (m, 1H), 4.27 (d,  $J$  = 18.2 Hz, 1H), 4.08 (d,  $J$  = 18.2 Hz, 1H), 1.72 (s, 3H).  $^{13}\text{C}$  NMR (101 MHz, Chloroform-*d*)  $\delta$  194.9, 173.2, 150.0, 144.1, 141.8, 140.2, 134.0, 131.7, 131.6, 129.5, 129.0, 127.6, 126.4, 125.7, 125.4, 124.3, 123.1, 119.8, 115.6, 49.2, 46.2, 30.2.

**5,10-dimethyl-5-(2-oxo-2-phenylethyl)-12-phenylindolo[2,1-a]isoquinolin-6(5H)-one (5i)<sup>2</sup>**

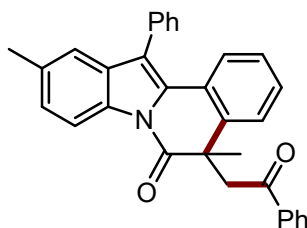

White solid (70.9 mg, 78% yield),  $^1\text{H}$  NMR (400 MHz, Chloroform-*d*)  $\delta$  8.51 (d,  $J$  = 8.3 Hz, 1H), 7.97 – 7.90 (m, 2H), 7.73 – 7.36 (m, 9H), 7.23 (dd,  $J$  = 8.2, 1.4 Hz, 2H), 7.17 – 7.09 (m, 2H), 6.99 – 6.95 (m, 1H), 4.36 (d,  $J$  = 18.2 Hz, 1H), 4.10 (d,  $J$  = 18.1 Hz, 1H), 2.42 (s, 3H), 1.73 (s, 3H).  $^{13}\text{C}$  NMR (101 MHz, Chloroform-*d*)  $\delta$  196.4, 173.1, 139.3, 136.3, 134.6, 134.0, 133.3, 132.6, 132.5, 130.4, 129.9, 129.2, 128.6, 128.2, 128.1, 127.9, 127.0, 126.4, 125.7, 125.4, 124.2, 120.0, 119.2, 116.3, 48.3, 45.8, 30.7, 21.5.

**10-chloro-5-methyl-5-(2-oxo-2-phenylethyl)-12-phenylindolo[2,1-a]isoquinolin-6(5H)-one (5j)<sup>2</sup>**

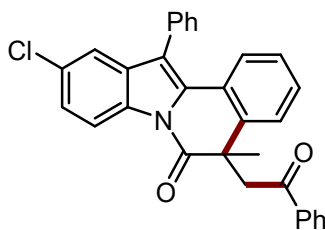

White solid (61.7 mg, 65% yield),  $^1\text{H}$  NMR (400 MHz, Chloroform-*d*)  $\delta$  8.55 (d,  $J$  = 8.7 Hz, 1H), 7.95 – 7.85 (m, 2H), 7.67 – 7.37 (m, 10H), 7.34 (dd,  $J$  = 8.7, 2.1 Hz, 1H), 7.29 (d,  $J$  = 2.1 Hz, 1H), 7.24 (d,  $J$  = 6.8 Hz, 1H), 7.20 – 7.14 (m, 1H), 6.98 (td,  $J$  = 7.7, 7.3, 1.3 Hz, 1H), 4.34 (d,  $J$  = 18.1 Hz, 1H), 4.11 (d,  $J$  = 18.1 Hz, 1H), 1.73 (s, 3H).  $^{13}\text{C}$  NMR (101 MHz, Chloroform-*d*)  $\delta$  196.4, 173.3, 139.5, 136.1, 133.73, 133.71, 133.5, 132.7, 131.1, 130.3, 130.0, 129.4, 128.7, 128.6, 128.3, 128.1, 126.6, 125.9, 125.7, 124.9, 124.3, 119.3, 118.9, 117.7, 48.6, 45.8, 30.6.

**10-isocyano-5-methyl-5-(2-oxo-2-phenylethyl)-12-phenylindolo[2,1-a]isoquinolin-6(5H)-one**



(5k)<sup>2</sup>

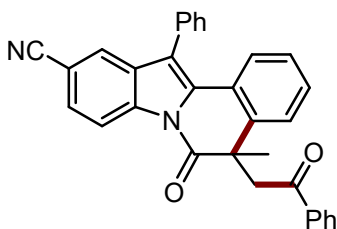

White solid (51.2 mg, 55% yield), <sup>1</sup>H NMR (400 MHz, Chloroform-*d*) δ 8.71 (d, *J* = 8.5 Hz, 1H), 7.94 – 7.86 (m, 2H), 7.77 – 7.49 (m, 10H), 7.43 (t, *J* = 7.7 Hz, 2H), 7.29 – 7.18 (m, 2H), 7.03 – 6.99 (m, 1H), 4.34 (d, *J* = 18.2 Hz, 1H), 4.15 (d, *J* = 18.2 Hz, 1H), 1.74 (s, 3H). <sup>13</sup>C NMR (101 MHz, Chloroform-*d*) δ 196.4, 173.7, 139.4, 136.2, 135.9, 133.6, 133.1, 132.5, 132.0, 130.2, 129.5, 129.2, 128.7, 128.6, 128.1, 126.8, 126.1, 124.4, 124.1, 119.7, 119.2, 117.4, 107.7, 48.8, 45.9, 30.5.

**1,3-dimethyl-3-(2-oxo-2-phenylethyl)indolin-2-one (7a)<sup>4</sup>**

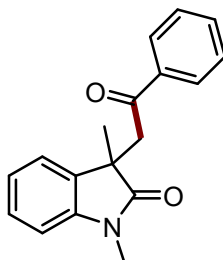

Colorless oil (34.1 mg, 61% yield), <sup>1</sup>H NMR (400 MHz, Chloroform-*d*) δ 7.88 – 7.76 (m, 2H), 7.55 – 7.49 (m, 1H), 7.40 (t, *J* = 7.8 Hz, 2H), 7.29 – 7.22 (m, 1H), 7.14 (d, *J* = 7.4 Hz, 1H), 6.98 (t, *J* = 7.5 Hz, 1H), 6.90 (d, *J* = 7.8 Hz, 1H), 3.68 (q, *J* = 16.0 Hz, 2H), 3.31 (s, 3H), 1.44 (s, 3H). <sup>13</sup>C NMR (101 MHz, Chloroform-*d*) δ 196.1, 180.6, 143.8, 136.4, 133.7, 133.2, 128.5, 128.0, 127.8, 122.2, 121.8, 108.2, 46.0, 45.3, 26.5, 24.9.

**1,3-dimethyl-3-(2-oxo-2-(*p*-tolyl)ethyl)indolin-2-one (7b)<sup>4</sup>**

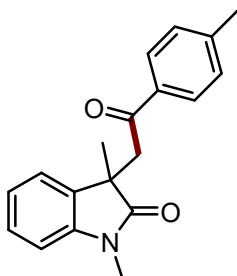

Colorless oil (29.2 mg, 50% yield), <sup>1</sup>H NMR (400 MHz, Chloroform-*d*) δ 7.73 (d, *J* = 8.2 Hz, 2H), 7.24 (dd, *J* = 7.7, 1.3 Hz, 1H), 7.19 (d, *J* = 8.0 Hz, 2H), 7.13 (d, *J* = 7.4 Hz, 1H), 6.97 (t, *J* = 7.5 Hz, 1H), 6.89 (d, *J* = 7.7 Hz, 1H), 3.65 (q, *J* = 16.2 Hz, 2H), 3.31 (s, 3H), 2.37 (s, 3H), 1.43 (s, 3H). <sup>13</sup>C NMR (151 MHz, Chloroform-*d*) δ 195.7, 180.7, 144.0, 143.9, 134.0, 133.8, 129.2, 128.1, 127.8, 122.1, 121.8, 108.1, 45.9, 45.3, 26.5, 24.9, 21.6.

**3-(2-(4-methoxyphenyl)-2-oxoethyl)-1,3-dimethylindolin-2-one (7c)<sup>4</sup>**

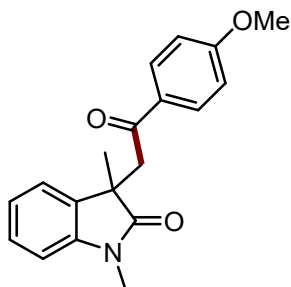

Colorless oil (37.3 mg, 60% yield),  $^1\text{H NMR}$  (400 MHz, Chloroform-*d*)  $\delta$  7.81 (d,  $J = 8.8$  Hz, 2H), 7.23 (d,  $J = 7.7$  Hz, 1H), 7.13 (d,  $J = 7.3$  Hz, 1H), 6.97 (t,  $J = 7.5$  Hz, 1H), 6.93 – 6.82 (m, 3H), 3.83 (s, 3H), 3.63 (q,  $J = 16.1$  Hz, 2H), 3.31 (s, 3H), 1.43 (s, 3H).  $^{13}\text{C NMR}$  (101 MHz, Chloroform-*d*)  $\delta$  194.6, 180.7, 163.5, 143.8, 133.9, 130.2, 129.6, 127.8, 122.1, 121.8, 113.6, 108.1, 55.4, 45.7, 45.4, 26.4, 24.9.

**3-(2-(4-(*tert*-butyl)phenyl)-2-oxoethyl)-1,3-dimethylindolin-2-one (7d)<sup>4</sup>**

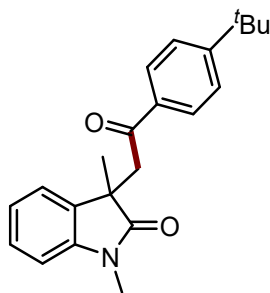

Colorless oil (40.1 mg, 60% yield),  $^1\text{H NMR}$  (400 MHz, Chloroform-*d*)  $\delta$  7.80 – 7.73 (m, 2H), 7.43 – 7.35 (m, 2H), 7.24 (dd,  $J = 7.7, 1.2$  Hz, 1H), 7.13 – 7.11 (m, 1H), 6.96 (td,  $J = 7.5, 1.0$  Hz, 1H), 6.89 (d,  $J = 7.7$  Hz, 1H), 3.67 (q,  $J = 16.3$  Hz, 2H), 3.31 (s, 3H), 1.31 (s, 9H).  $^{13}\text{C NMR}$  (101 MHz, Chloroform-*d*)  $\delta$  195.8, 180.7, 156.9, 143.8, 133.84, 133.83, 127.9, 127.8, 125.4, 122.1, 121.7, 108.1, 45.9, 45.3, 35.1, 31.0, 26.5, 24.9.

**3-(2-(4-chlorophenyl)-2-oxoethyl)-1,3-dimethylindolin-2-one (7e)<sup>4</sup>**

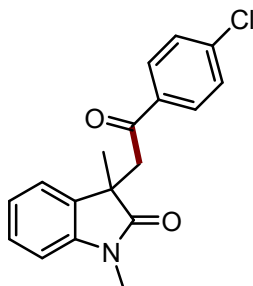

Colorless oil (24.8 mg, 40% yield),  $^1\text{H NMR}$  (400 MHz, Chloroform-*d*)  $\delta$  7.81 – 7.70 (m, 2H), 7.40 – 7.32 (m, 2H), 7.28 – 7.23 (m, 1H), 7.13 (dd,  $J = 7.5, 1.2$  Hz, 1H), 6.98 (td,  $J = 7.5, 1.0$  Hz, 1H), 6.90 (d,  $J = 7.8$  Hz, 1H), 3.63 (q,  $J = 16.0$  Hz, 2H), 3.30 (s, 3H), 1.44 (s, 3H).  $^{13}\text{C NMR}$  (101 MHz, Chloroform-*d*)  $\delta$  194.9, 180.4, 143.8, 139.7, 134.7, 133.5, 129.4, 128.8, 127.9, 122.2, 121.8, 108.2, 46.0, 45.3, 26.5, 24.9.

**3-(2-(4-bromophenyl)-2-oxoethyl)-1,3-dimethylindolin-2-one (7f)<sup>5</sup>**

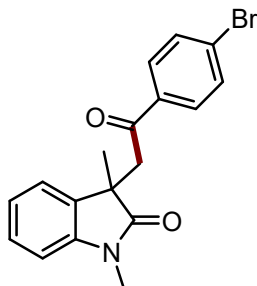

Colorless oil (30.0 mg, 42% yield), <sup>1</sup>H NMR (400 MHz, Chloroform-*d*) δ 7.72 – 7.66 (m, 2H), 7.56 – 7.51 (m, 2H), 7.29 – 7.23 (m, 1H), 7.14 – 7.12 (m, 1H), 6.98 (td, *J* = 7.5, 1.0 Hz, 1H), 6.90 (d, *J* = 7.8 Hz, 1H), 3.63 (q, *J* = 16.0 Hz, 2H), 3.30 (s, 3H), 1.43 (s, 3H). <sup>13</sup>C NMR (101 MHz, Chloroform-*d*) δ 195.1, 180.4, 143.8, 135.1, 133.5, 131.8, 129.5, 128.4, 127.9, 122.2, 121.8, 108.2, 45.9, 45.3, 26.5, 24.9.

**1,3-dimethyl-3-(2-(naphthalen-2-yl)-2-oxoethyl)indolin-2-one (7g)<sup>5</sup>**

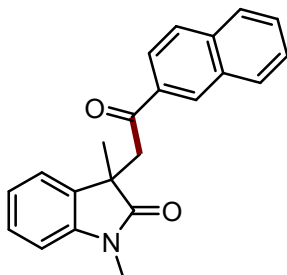

Colorless oil (26.3 mg, 53% yield), <sup>1</sup>H NMR (400 MHz, Chloroform-*d*) δ 8.39 (s, 1H), 7.92 (d, *J* = 8.0 Hz, 1H), 7.88 – 7.78 (m, 3H), 7.60 – 7.51 (m, 2H), 7.29 – 7.23 (m, 1H), 7.19 – 7.17 (m, 1H), 6.98 (td, *J* = 7.5, 1.0 Hz, 1H), 6.91 (d, *J* = 7.8 Hz, 1H), 3.82 (q, *J* = 16.3 Hz, 2H), 3.32 (s, 3H), 1.49 (s, 3H). <sup>13</sup>C NMR (101 MHz, Chloroform-*d*) δ 196.1, 180.7, 143.9, 135.6, 133.8, 133.7, 132.4, 129.7, 129.5, 128.5, 128.3, 127.9, 127.7, 126.8, 123.7, 122.2, 121.8, 108.2, 46.1, 45.4, 26.5, 24.9.

**5-chloro-1,3-dimethyl-3-(2-oxo-2-phenylethyl)indolin-2-one (7h)<sup>4</sup>**

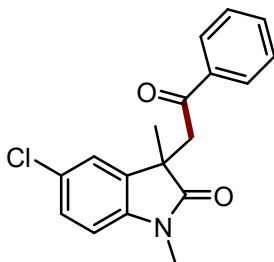

Colorless oil (36.0 mg, 58% yield), <sup>1</sup>H NMR (400 MHz, Chloroform-*d*) δ 7.88 – 7.80 (m, 2H), 7.59 – 7.50 (m, 1H), 7.41 (t, *J* = 7.7 Hz, 2H), 7.23 (dd, *J* = 8.3, 2.1 Hz, 1H), 7.10 (d, *J* = 2.1 Hz,

1H), 6.82 (d,  $J = 8.3$  Hz, 1H), 3.69 (s, 2H), 3.30 (s, 3H), 1.43 (s, 3H).  $^{13}\text{C}$  NMR (101 MHz, Chloroform- $d$ )  $\delta$  195.8, 180.1, 142.5, 136.1, 135.6, 133.4, 128.6, 128.0, 127.7, 127.5, 122.3, 109.0, 46.1, 45.4, 26.6, 24.8.

**3-benzoyl-1-methylquinoxalin-2(1H)-one (9a)**<sup>6</sup>

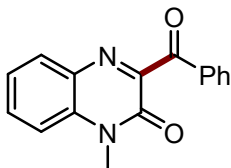

White solid (36.9 mg, 70% yield),  $^1\text{H}$  NMR (400 MHz, Chloroform- $d$ )  $\delta$  8.01 – 7.96 (m, 2H), 7.93 (dd,  $J = 8.3, 1.5$  Hz, 1H), 7.70 – 7.65 (m, 1H), 7.63 – 7.60 (m, 1H), 7.51 – 7.45 (m, 2H), 7.44 – 7.38 (m, 2H), 3.75 (s, 3H).  $^{13}\text{C}$  NMR (101 MHz, Chloroform- $d$ )  $\delta$  191.8, 154.7, 153.3, 134.9, 134.2, 133.9, 132.2, 132.1, 131.0, 130.0, 128.7, 124.2, 114.0, 29.1.

**1-methyl-3-(4-methylbenzoyl)quinoxalin-2(1H)-one (9b)**<sup>6</sup>

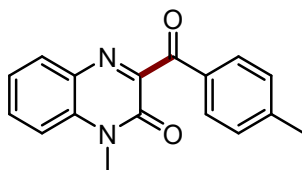

White solid (31.1 mg, 56% yield),  $^1\text{H}$  NMR (400 MHz, Chloroform- $d$ )  $\delta$  7.93 (dd,  $J = 8.4, 1.6$  Hz, 1H), 7.91 – 7.83 (m, 2H), 7.70 – 7.65 (m, 1H), 7.43 – 7.39 (m, 2H), 7.28 (d,  $J = 8.1$  Hz, 2H), 3.75 (s, 3H), 2.43 (s, 3H).  $^{13}\text{C}$  NMR (101 MHz, Chloroform- $d$ )  $\delta$  191.4, 155.0, 153.4, 145.3, 133.9, 132.5, 132.3, 131.9, 131.0, 130.1, 129.4, 124.1, 113.9, 29.0, 21.9.

**3-(4-methoxybenzoyl)-1-methylquinoxalin-2(1H)-one (9c)**<sup>6</sup>

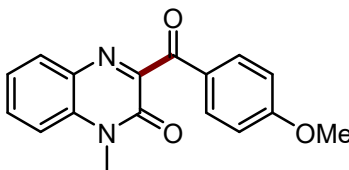

White solid (35.2 mg, 60% yield),  $^1\text{H}$  NMR (400 MHz, Chloroform- $d$ )  $\delta$  8.00 – 7.94 (m, 2H), 7.93 (dd,  $J = 8.4, 1.5$  Hz, 1H), 7.69 – 7.65 (m, 1H), 7.46 – 7.36 (m, 2H), 6.99 – 6.91 (m, 2H), 3.88 (s, 3H), 3.75 (s, 3H).  $^{13}\text{C}$  NMR (101 MHz, Chloroform- $d$ )  $\delta$  190.2, 164.5, 155.0, 153.4, 133.9, 132.5, 132.2, 131.9, 130.9, 128.0, 124.1, 114.0, 113.9, 55.6, 29.1.

**3-(4-(tert-butyl)benzoyl)-1-methylquinoxalin-2(1H)-one (9d)**

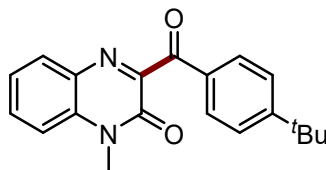

Yellow solid (35.2 mg, 55% yield), mp 170.3 – 172.1 °C,  $^1\text{H}$  NMR (400 MHz, Chloroform-*d*)  $\delta$  7.94 – 7.91 (m, 1H), 7.89 – 7.82 (m, 2H), 7.72 – 7.66 (m, 1H), 7.65 – 7.60 (m, 2H), 7.45 – 7.40 (m, 2H), 3.75 (s, 3H).  $^{13}\text{C}$  NMR (101 MHz, Chloroform-*d*)  $\delta$  190.6, 153.9, 153.3, 134.0, 133.7, 132.3, 132.2, 132.0, 131.8, 131.6, 131.4, 131.1, 129.6, 124.3, 114.0, 29.1. HRMS (ESI-TOF)  $m/z$ :  $[\text{M} + \text{H}]^+$  Calcd for  $\text{C}_{20}\text{H}_{21}\text{N}_2\text{O}_2$ , 321.1598, Found: 321.1603.

**3-(4-bromobenzoyl)-1-methylquinoxalin-2(1H)-one (9e)<sup>6</sup>**

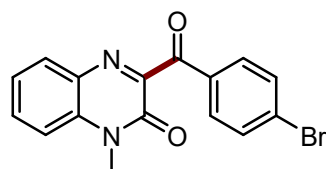

White solid (30.7 mg, 45% yield),  $^1\text{H}$  NMR (400 MHz, Chloroform-*d*)  $\delta$  7.94 – 7.91 (m, 1H), 7.88 – 7.82 (m, 2H), 7.72 – 7.66 (m, 1H), 7.66 – 7.60 (m, 2H), 7.45 – 7.40 (m, 2H), 3.75 (s, 3H).  $^{13}\text{C}$  NMR (101 MHz, Chloroform-*d*)  $\delta$  190.6, 153.9, 153.3, 134.0, 133.7, 132.3, 132.2, 132.0, 131.4, 131.1, 129.6, 124.3, 114.0, 29.1.

**3-benzoyl-1,6,7-trimethylquinoxalin-2(1H)-one (9f)**

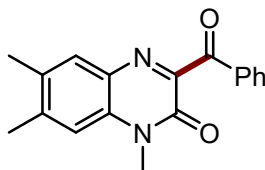

Reddish brown oil (35.5 mg, 61% yield),  $^1\text{H}$  NMR (400 MHz, Chloroform-*d*)  $\delta$  8.01 – 7.91 (m, 2H), 7.66 (s, 1H), 7.63 – 7.57 (m, 1H), 7.49 – 7.43 (m, 2H), 7.16 (s, 1H), 3.72 (s, 3H), 2.46 (s, 3H), 2.36 (s, 3H).  $^{13}\text{C}$  NMR (101 MHz, Chloroform-*d*)  $\delta$  192.0, 153.4, 153.3, 142.5, 135.1, 134.0, 133.3, 132.0, 130.9, 130.7, 130.0, 128.6, 114.5, 29.0, 20.8, 19.2. HRMS (ESI-TOF)  $m/z$ :  $[\text{M} + \text{H}]^+$  Calcd for  $\text{C}_{18}\text{H}_{17}\text{N}_2\text{O}_2$ , 293.1285, Found: 293.1289.

**3-benzoyl-6-chloro-1-methylquinoxalin-2(1H)-one (9g)<sup>6</sup>**

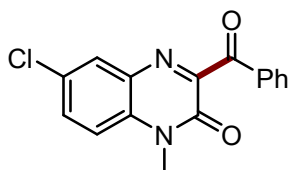

White solid (44.1 mg, 74% yield),  $^1\text{H}$  NMR (400 MHz, Chloroform-*d*)  $\delta$  8.01 – 7.95 (m, 2H), 7.92 (d,  $J = 2.4$  Hz, 1H), 7.67 – 7.60 (m, 2H), 7.49 (t,  $J = 7.8$  Hz, 2H), 7.35 (d,  $J = 9.0$  Hz, 1H), 3.74 (s, 3H).  $^{13}\text{C}$  NMR (151 MHz, Chloroform-*d*)  $\delta$  191.2, 155.9, 153.0, 134.6, 134.4, 132.7, 132.6, 132.0, 130.2, 130.0, 129.6, 128.7, 115.1, 29.3.

**3-benzoyl-1-ethylquinoxalin-2(1H)-one (9h)<sup>6</sup>**

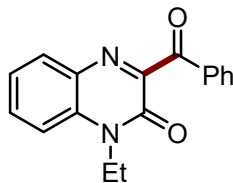

White solid (40.0 mg, 72% yield),  $^1\text{H}$  NMR (400 MHz, Chloroform-*d*)  $\delta$  8.05 – 7.97 (m, 2H), 7.94 (dd,  $J = 8.0, 1.6$  Hz, 1H), 7.70 – 7.59 (m, 2H), 7.44 – 7.38 (m, 2H), 7.44 – 7.38 (m, 2H), 4.37 (q,  $J = 7.2$  Hz, 2H), 1.43 (t,  $J = 7.2$  Hz, 3H).  $^{13}\text{C}$  NMR (101 MHz, Chloroform-*d*)  $\delta$  191.8, 154.7, 152.8, 134.9, 134.2, 132.9, 132.5, 132.0, 131.3, 130.0, 128.7, 124.0, 113.8, 37.4, 12.5.

**3-benzoyl-1-benzylquinoxalin-2(1H)-one (9i)<sup>6</sup>**

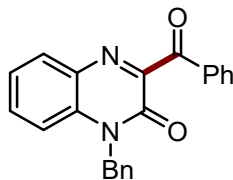

White solid (42.8 mg, 63% yield),  $^1\text{H}$  NMR (400 MHz, Chloroform-*d*)  $\delta$  8.02 (dd,  $J = 8.4, 1.3$  Hz, 2H), 7.94 – 7.92 (m, 1H), 7.68 – 7.59 (m, 1H), 7.57 – 7.47 (m, 3H), 7.39 – 7.27 (m, 7H), 5.53 (s, 2H).  $^{13}\text{C}$  NMR (101 MHz, Chloroform-*d*)  $\delta$  191.7, 154.8, 153.5, 134.90, 134.85, 134.3, 133.3, 132.5, 132.0, 131.1, 130.0, 129.0, 128.7, 127.9, 127.1, 124.2, 114.8, 45.9.

**1-allyl-3-benzoylquinoxalin-2(1H)-one (9j)<sup>6</sup>**

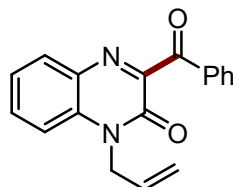

Pale yellow solid (37.5 mg, 64% yield),  $^1\text{H}$  NMR (400 MHz, Chloroform-*d*)  $\delta$  8.04 – 7.89 (m, 3H), 7.69 – 7.57 (m, 2H), 7.49 (dd,  $J = 8.4, 7.2$  Hz, 2H), 7.43 – 7.35 (m, 2H), 6.00 – 5.91 (m, 1H), 5.36 – 5.20 (m, 2H), 4.95 (dt,  $J = 5.4, 1.7$  Hz, 2H).  $^{13}\text{C}$  NMR (101 MHz, Chloroform-*d*)  $\delta$  191.7, 154.7, 152.9, 134.9, 134.2, 133.2, 132.4, 131.9, 131.1, 130.3, 130.0, 128.7, 124.2, 118.8, 114.5, 44.5.

**(2,2-dioxidobenzo[e][1,2,3]oxathiazin-4-yl)(phenyl)methanone (9k)**

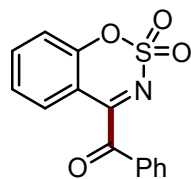

Colorless oil (30.4 mg, 53% yield),  $^1\text{H NMR}$  (400 MHz, Chloroform-*d*)  $\delta$  8.09 – 8.01 (m, 2H), 7.82 – 7.71 (m, 2H), 7.63 – 7.54 (m, 3H), 7.42 – 7.33 (m, 2H).  $^{13}\text{C NMR}$  (101 MHz, Chloroform-*d*)  $\delta$  187.8, 171.6, 155.0, 138.1, 135.9, 133.1, 130.5, 129.9, 129.3, 126.3, 119.4, 114.1. HRMS (ESI-TOF)  $m/z$ :  $[\text{M} + \text{H}]^+$  Calcd for  $\text{C}_{14}\text{H}_{10}\text{NO}_4\text{S}$ , 288.0325, Found: 288.0327.

**(7-methyl-2,2-dioxidobenzof[e][1,2,3]oxathiazin-4-yl)(phenyl)methanone (9l)**

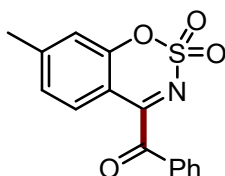

White solid (30.7 mg, 51% yield), mp 138.3 – 140.2 °C,  $^1\text{H NMR}$  (400 MHz, Chloroform-*d*)  $\delta$  8.07 – 8.01 (m, 2H), 7.76 – 7.69 (m, 1H), 7.56 (t,  $J = 7.9$  Hz, 2H), 7.47 (d,  $J = 8.1$  Hz, 1H), 7.20 (s, 1H), 7.17 – 7.12 (m, 1H), 2.51 (s, 3H).  $^{13}\text{C NMR}$  (101 MHz, Chloroform-*d*)  $\delta$  187.9, 171.5, 155.1, 151.1, 135.7, 133.2, 130.5, 129.7, 129.3, 127.3, 119.5, 111.8, 22.4. HRMS (ESI-TOF)  $m/z$ :  $[\text{M} + \text{H}]^+$  Calcd for  $\text{C}_{15}\text{H}_{12}\text{NO}_4\text{S}$ , 302.0482, Found: 302.0485.

**(6-fluoro-2,2-dioxidobenzof[e][1,2,3]oxathiazin-4-yl)(phenyl)methanone (9m)**

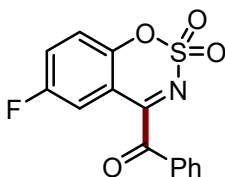

Yellow oil (30.7 mg, 51% yield), mp 112.2 – 114.1 °C,  $^1\text{H NMR}$  (400 MHz, Chloroform-*d*)  $\delta$  8.06 (dd,  $J = 8.4, 1.3$  Hz, 2H), 7.79 – 7.72 (m, 1H), 7.62 – 7.56 (m, 2H), 7.53 – 7.49 (m, 1H), 7.41 (dd,  $J = 9.1, 4.2$  Hz, 1H), 7.35 (dd,  $J = 7.6, 2.9$  Hz, 1H).  $^{13}\text{C NMR}$  (101 MHz, Chloroform-*d*)  $\delta$  187.3, 170.1, 159.0 (d,  $^1J_{\text{C-F}} = 249.7$  Hz), 151.0, 136.0, 132.8, 130.6, 129.4, 125.4 (d,  $^2J_{\text{C-F}} = 24.3$  Hz), 121.2 (d,  $^1J_{\text{C-F}} = 8.1$  Hz), 115.9 (d,  $^2J_{\text{C-F}} = 25.3$  Hz), 114.6 (d,  $^3J_{\text{C-F}} = 8.3$  Hz).  $^{19}\text{F NMR}$  (376 MHz, Chloroform-*d*)  $\delta$  -112.15. HRMS (ESI-TOF)  $m/z$ :  $[\text{M} + \text{H}]^+$  Calcd for  $\text{C}_{14}\text{H}_9\text{FNO}_4\text{S}$ , 306.0231, Found: 306.0233.

**2-(3-benzoyl-2-oxoquinoxalin-1(2H)-yl)ethyl 2-(4-isobutylphenyl)propanoate (9n)**

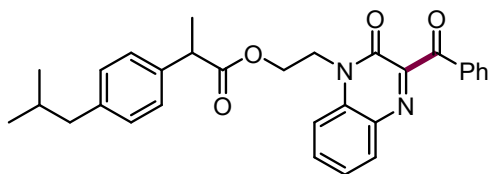

Reddish brown oil (62.3 mg, 65% yield),  $^1\text{H}$  NMR (400 MHz, Chloroform-*d*)  $\delta$  8.03 – 7.94 (m, 2H), 7.92 (dd,  $J = 8.0, 1.6$  Hz, 1H), 7.65 – 7.55 (m, 2H), 7.51 – 7.44 (m, 3H), 7.41 – 7.37 (m, 1H), 7.11 – 7.01 (m, 4H), 4.61 – 4.36 (m, 4H), 3.59 (q,  $J = 7.2$  Hz, 1H), 2.43 (d,  $J = 7.1$  Hz, 2H), 1.89 – 1.76 (m, 1H), 1.40 (d,  $J = 7.1$  Hz, 3H), 0.89 (d,  $J = 6.6$  Hz, 7H).  $^{13}\text{C}$  NMR (101 MHz, Chloroform-*d*)  $\delta$  191.6, 174.7, 154.4, 153.2, 140.7, 137.1, 134.8, 134.3, 133.5, 132.3, 132.1, 131.2, 130.0, 129.4, 128.7, 127.1, 124.2, 114.2, 61.0, 45.03, 44.97, 41.0, 30.2, 22.4, 18.4. HRMS (ESI-TOF)  $m/z$ :  $[\text{M} + \text{Na}]^+$  Calcd for  $\text{C}_{30}\text{H}_{30}\text{N}_2\text{NaO}_4$ , 505.2098, Found: 505.2097.

**2-(3-benzoyl-2-oxoquinoxalin-1(2H)-yl)ethyl 2-(2-(1-phenyl-4-fluorophenyl)ethyl)propanoate (9o)**

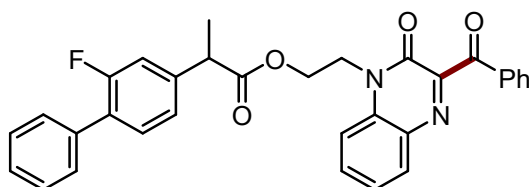

Yellow oil (52 mg, 50% yield),  $^1\text{H}$  NMR (400 MHz, Chloroform-*d*)  $\delta$  8.02 – 7.95 (m, 2H), 7.91 (dd,  $J = 8.0, 1.5$  Hz, 1H), 7.64 – 7.57 (m, 2H), 7.53 – 7.30 (m, 10H), 7.04 – 6.94 (m, 2H), 4.63 – 4.43 (m, 4H), 3.64 (q,  $J = 7.2$  Hz, 1H), 1.45 (d,  $J = 7.2$  Hz, 3H).  $^{13}\text{C}$  NMR (101 MHz, Chloroform-*d*)  $\delta$  191.5, 174.0, 154.4, 153.2, 141.1 (d,  $^3J_{\text{C-F}} = 7.5$  Hz), 135.3, 134.8, 133.4, 133.2 (d,  $^1J_{\text{C-F}} = 229.9$  Hz), 132.3, 130.9 (d,  $^3J_{\text{C-F}} = 4.0$  Hz), 130.1, 128.9 (d,  $^3J_{\text{C-F}} = 3.0$  Hz), 128.7, 128.5, 127.7, 128.0, 127.9, 115.2 (d,  $^2J_{\text{C-F}} = 23.8$  Hz), 114.0, 61.3, 44.9, 41.0, 18.2.  $^{19}\text{F}$  NMR (376 MHz, Chloroform-*d*)  $\delta$  -117.28. HRMS (ESI-TOF)  $m/z$ :  $[\text{M} + \text{Na}]^+$  Calcd for  $\text{C}_{32}\text{H}_{25}\text{FN}_2\text{NaO}_4$ , 543.1691, Found: 543.1693.

**3-benzoyl-1-(3-(((8R,9S,13S,14S)-13-methyl-17-oxo-7,8,9,11,12,13,14,15,16,17-decahydro-6H-cyclopenta[*a*]phenanthren-2-yl)oxy)propyl)quinoxalin-2(1H)-one (9p)**

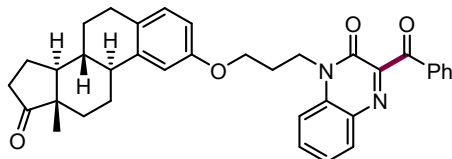

Yellow oil (61.6 mg, 55% yield),  $^1\text{H}$  NMR (400 MHz, Chloroform-*d*)  $\delta$  8.00 – 7.91 (m, 3H), 7.66 – 7.56 (m, 3H), 7.49 – 7.45 (m, 2H), 7.42 – 7.38 (m, 1H), 7.21 (d,  $J = 8.6$  Hz, 1H), 6.73 (dd,  $J = 8.6, 2.8$  Hz, 1H), 6.65 (d,  $J = 2.7$  Hz, 1H), 4.59 – 4.46 (m, 2H), 4.09 (t,  $J = 5.7$  Hz, 2H), 2.96 – 2.83 (m, 2H), 2.51 (dd,  $J = 18.8, 8.6$  Hz, 1H), 2.43 – 2.37 (m, 1H), 2.32 – 2.25 (m, 3H), 2.20 – 2.11 (m, 1H), 2.09 – 1.93 (m, 3H), 1.67 – 1.40 (m, 6H), 0.91 (s, 3H).  $^{13}\text{C}$  NMR (101 MHz, Chloroform-*d*)  $\delta$  191.8, 156.5, 154.6, 153.2, 137.9, 134.9, 134.2, 133.2, 132.54, 132.46, 132.1, 131.2, 130.0, 128.7, 126.5, 124.1, 114.5, 114.1, 112.2, 65.2, 50.4, 48.0, 44.0, 39.9, 38.4, 35.9,



31.6, 29.7, 27.3, 26.5, 25.9, 21.6, 13.9. HRMS (ESI-TOF)  $m/z$ :  $[M + Na]^+$  Calcd for  $C_{36}H_{36}N_2NaO_4$ , 583.2567, Found: 583.2566.

**3-benzoyl-1-(4-(((1S,2R,5S)-2-isopropyl-5-methylcyclohexyl)oxy)methyl)benzyl)quinoxalin-2(1H)-one (9q)**

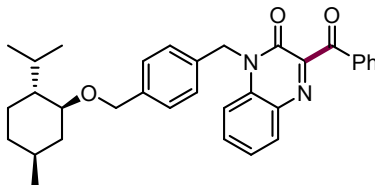

Yellow oil (56.9 mg, 56% yield),  $^1H$  NMR (400 MHz, Chloroform- $d$ )  $\delta$  8.07 – 7.97 (m, 2H), 7.92 (dd,  $J$  = 8.4, 1.5 Hz, 1H), 7.67 – 7.61 (m, 1H), 7.54 – 7.48 (m, 3H), 7.40 – 7.26 (m, 6H), 5.52 (s, 2H), 4.62 (d,  $J$  = 11.5 Hz, 1H), 4.35 (d,  $J$  = 11.5 Hz, 1H), 3.14 (td,  $J$  = 10.5, 4.1 Hz, 1H), 2.29 – 2.21 (m, 1H), 2.18 – 2.14 (m, 1H), 1.67 – 1.58 (m, 2H), 1.30 – 1.23 (m, 2H), 0.97 – 0.82 (m, 9H), 0.68 (d,  $J$  = 7.0 Hz, 3H).  $^{13}C$  NMR (101 MHz, Chloroform- $d$ )  $\delta$  191.7, 154.8, 153.5, 139.0, 134.9, 134.3, 134.0, 133.2, 132.5, 132.0, 131.1, 130.0, 128.7, 128.5, 127.1, 124.2, 114.9, 78.9, 70.0, 48.3, 45.7, 40.3, 34.5, 31.6, 25.5, 23.2, 22.4, 21.0, 16.1. HRMS (ESI-TOF)  $m/z$ :  $[M + Na]^+$  Calcd for  $C_{33}H_{36}N_2NaO_3$ , 531.2618, Found: 531.2626.

**2-(3-benzoyl-2-oxoquinoxalin-1(2H)-yl)ethyl 2-(11-oxo-6,11-dihydrodibenzo[*b,e*]oxepin-2-yl)acetate (9r)**

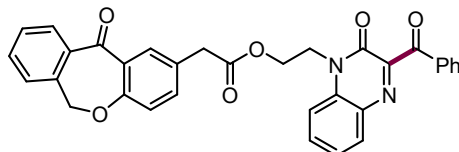

Yellow oil (48.9 mg, 45% yield),  $^1H$  NMR (400 MHz, Chloroform- $d$ )  $\delta$  8.05 – 7.97 (m, 3H), 7.90 (td,  $J$  = 8.2, 1.4 Hz, 2H), 7.67 – 7.55 (m, 3H), 7.52 – 7.44 (m, 4H), 7.40 – 7.34 (m, 2H), 7.30 (dd,  $J$  = 8.5, 2.4 Hz, 1H), 6.98 (d,  $J$  = 8.4 Hz, 1H), 5.18 (s, 2H), 4.62 – 4.48 (m, 4H), 3.56 (s, 2H).  $^{13}C$  NMR (101 MHz, Chloroform- $d$ )  $\delta$  191.6, 190.8, 171.4, 160.6, 154.4, 153.3, 140.4, 136.3, 135.5, 134.8, 134.3, 133.4, 132.9, 132.44, 132.36, 132.2, 131.3, 130.1, 129.5, 129.3, 128.7, 127.9, 127.1, 125.1, 124.3, 121.2, 113.9, 73.6, 61.1, 41.1, 39.9. HRMS (ESI-TOF)  $m/z$ :  $[M + Na]^+$  Calcd for  $C_{33}H_{24}N_2NaO_6$ , 567.1527, Found: 567.1531.

**Diethyl 2,6-dimethylpyridine-3,5-dicarboxylate (10c)<sup>7</sup>**

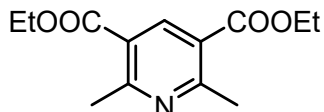

Colorless oil,  $^1H$  NMR (400 MHz, Chloroform- $d$ )  $\delta$  8.68 (s, 1H), 4.40 (q,  $J$  = 7.1 Hz, 4H), 2.85 (s, 6H), 1.42 (t,  $J$  = 7.1 Hz, 6H).  $^{13}C$  NMR (101 MHz, Chloroform- $d$ )  $\delta$  165.9, 162.2, 140.9, 123.0, 61.4, 24.9, 14.3.

#### 4. NMR Copies of Products

8.55  
8.53  
8.53  
7.82  
7.81  
7.80  
7.80  
7.79  
7.69  
7.68  
7.68  
7.68  
7.66  
7.61  
7.60  
7.59  
7.59  
7.58  
7.57  
7.57  
7.50  
7.49  
7.49  
7.48  
7.47  
7.47  
7.46  
7.45  
7.45  
7.44  
7.44  
7.43  
7.43  
7.42  
7.42  
7.37  
7.36  
7.36  
7.35  
7.34  
7.34  
7.33  
7.33  
7.32  
7.32  
7.32  
7.31  
7.31  
7.30  
7.29  
7.28  
7.28  
7.27  
7.26  
1.60

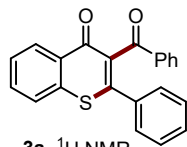

**3a**,  $^1\text{H}$  NMR  
400 MHz,  $\text{CDCl}_3$

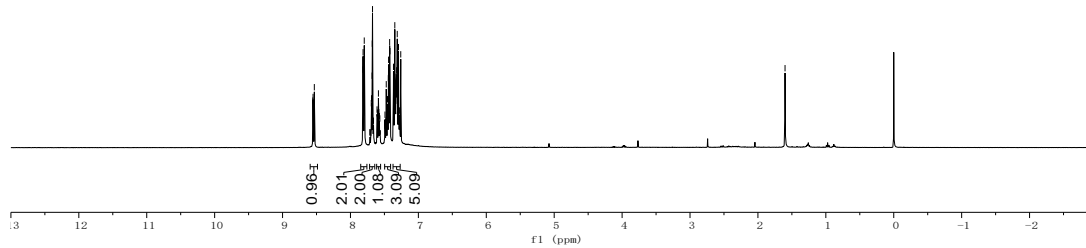

194.77  
178.87  
152.10  
137.52  
137.00  
135.22  
134.73  
133.42  
132.10  
130.66  
130.31  
129.15  
129.10  
128.75  
128.59  
128.57  
128.13  
126.09

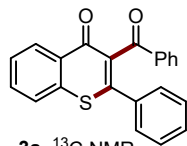

**3a**,  $^{13}\text{C}$  NMR  
101 MHz,  $\text{CDCl}_3$

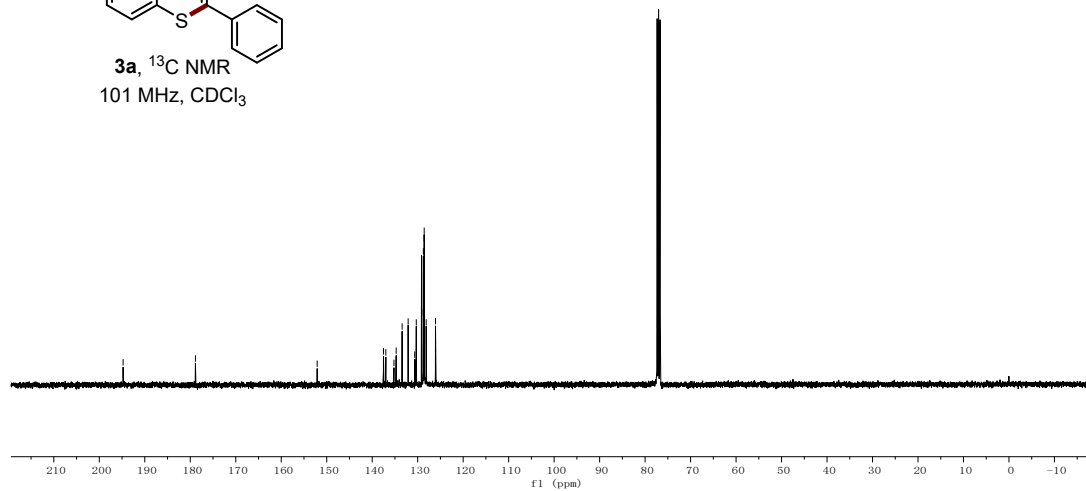

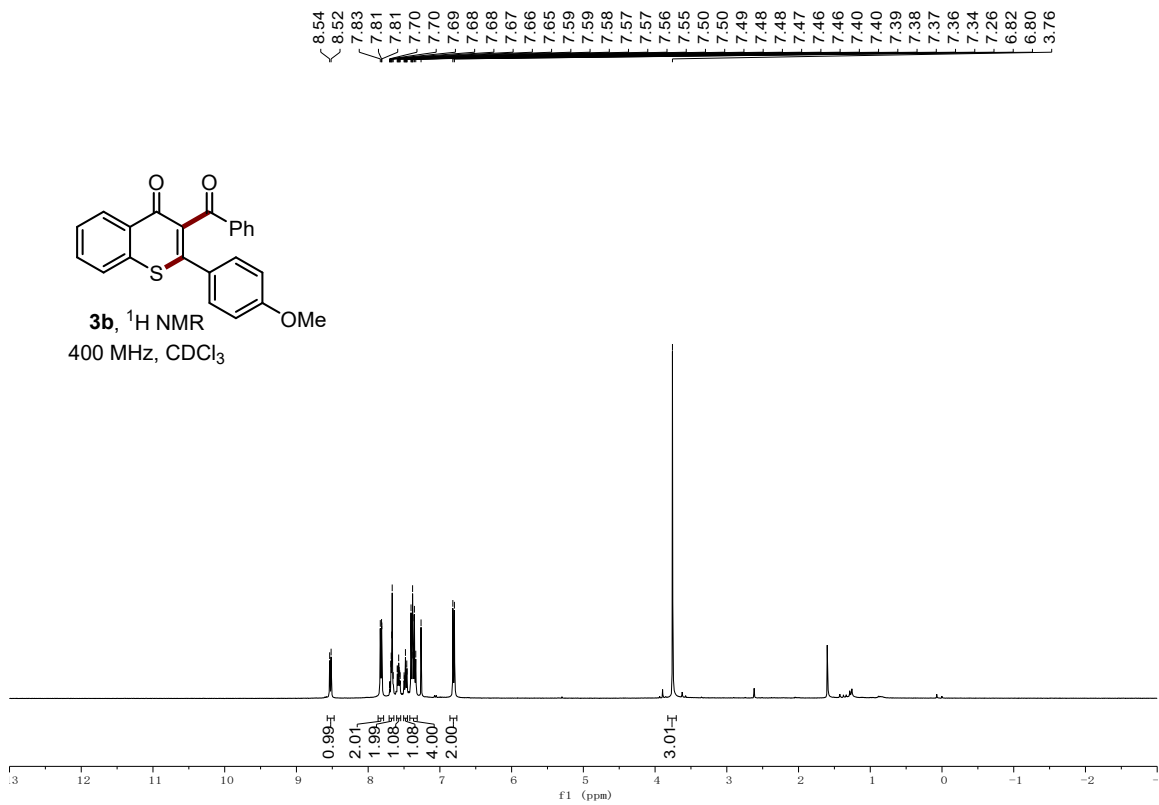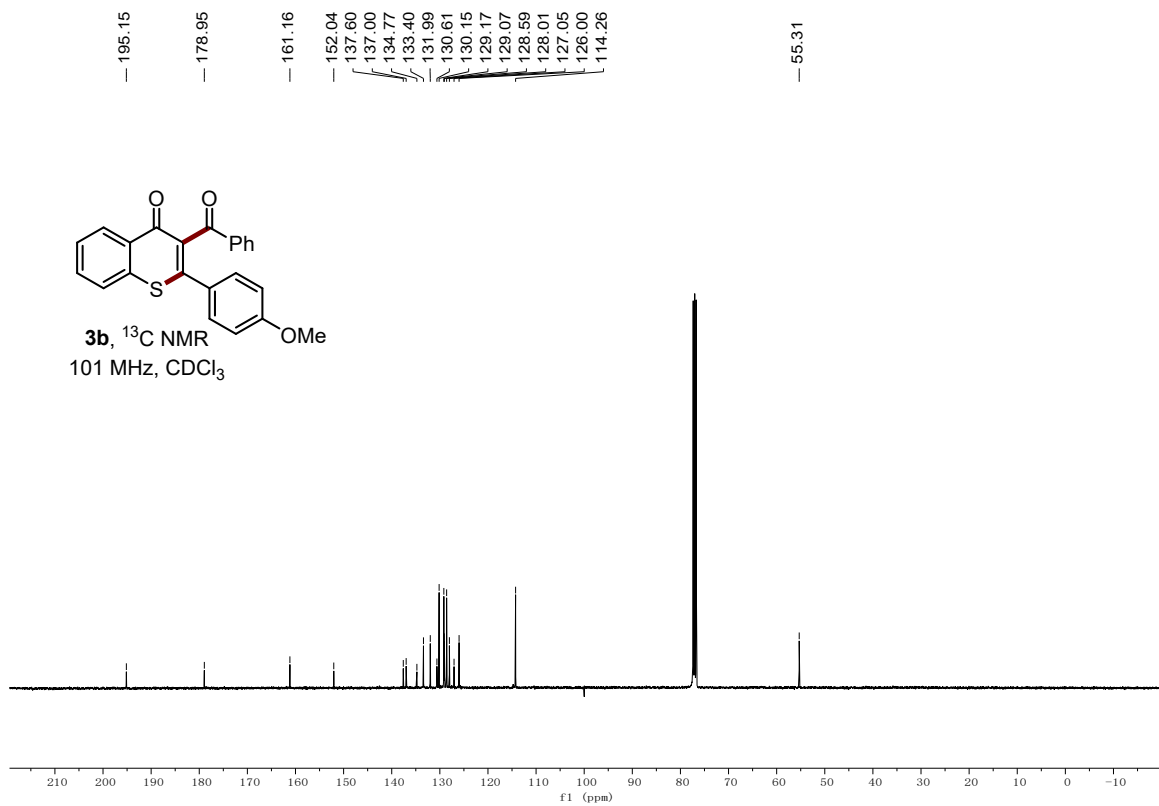

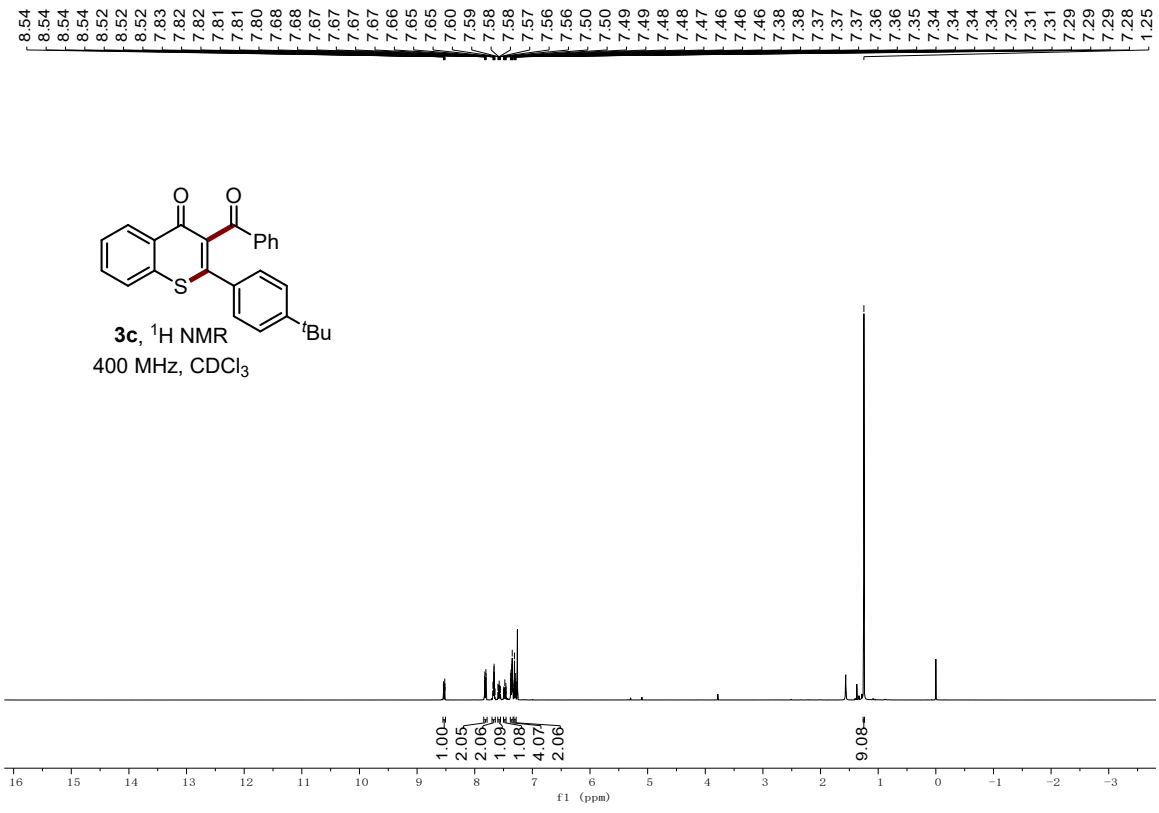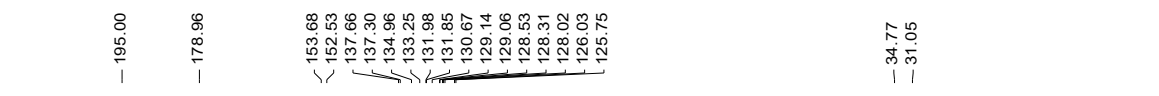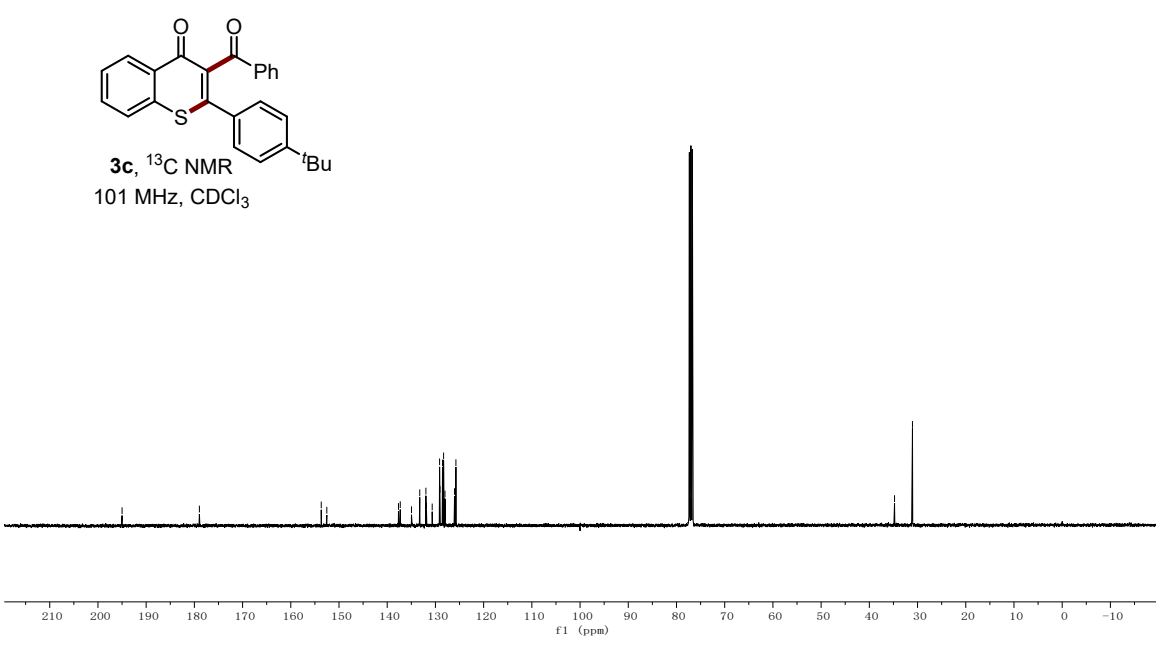



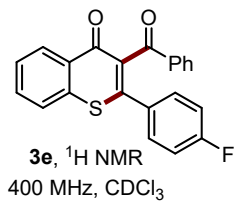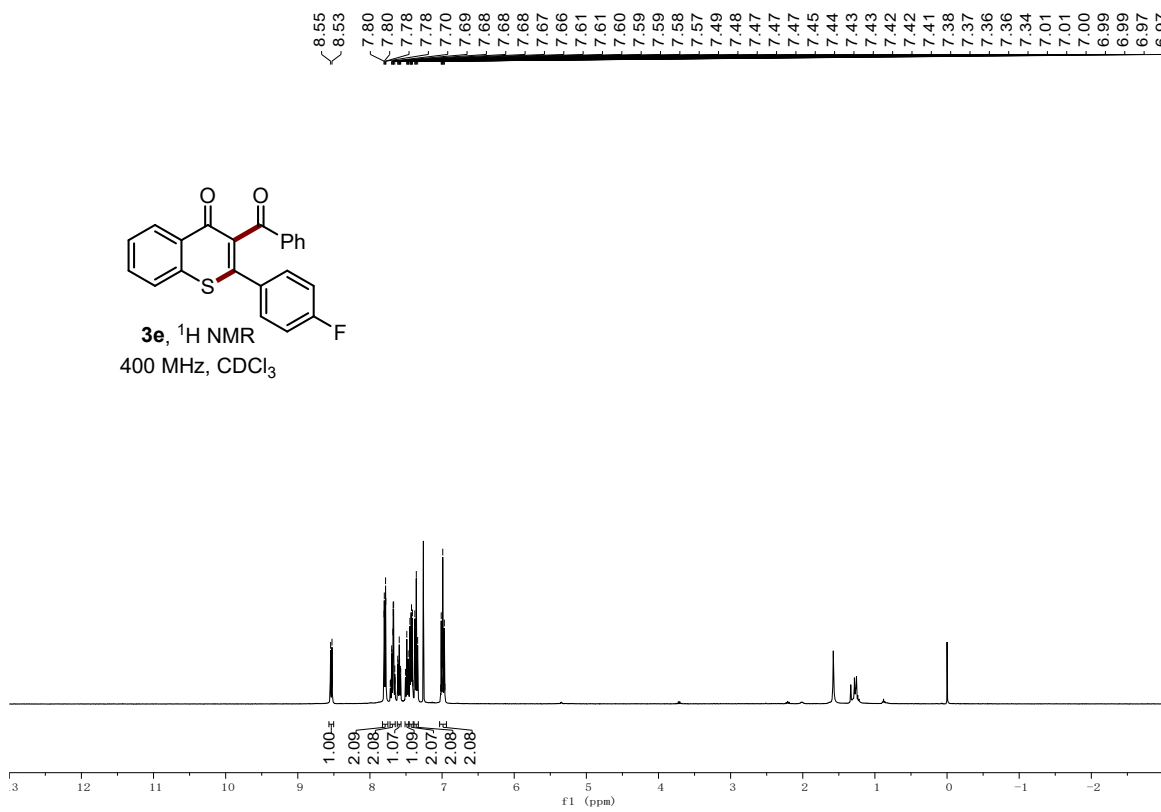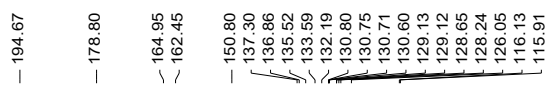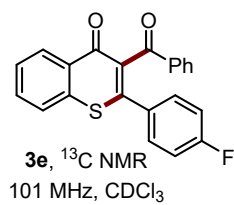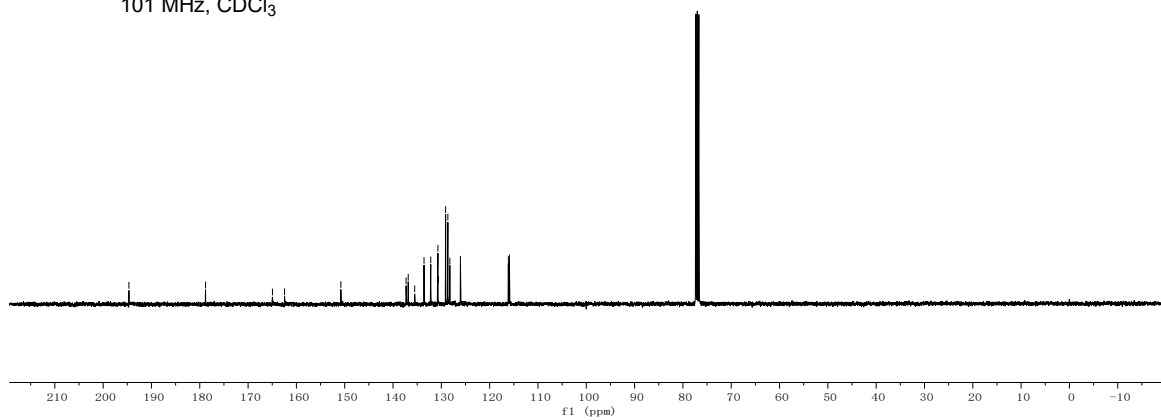

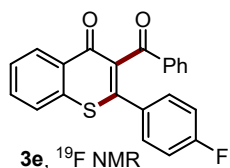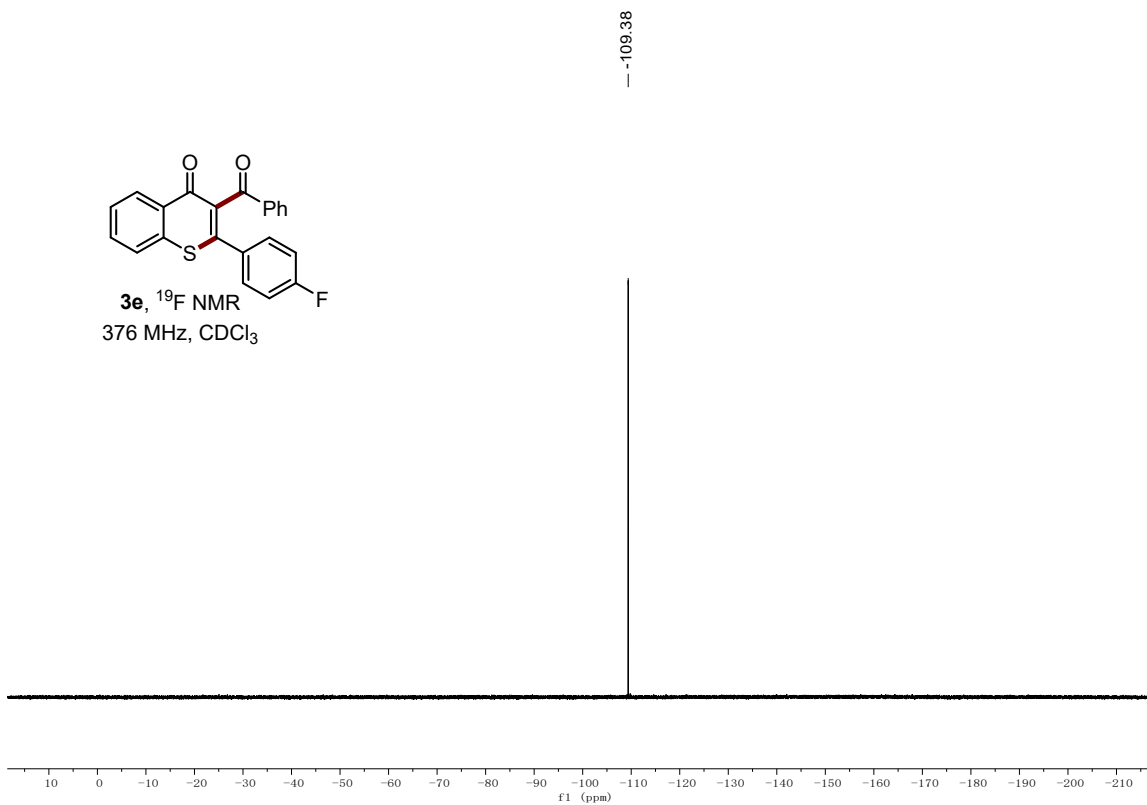

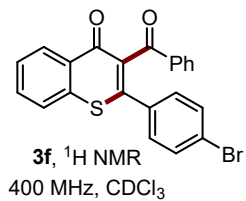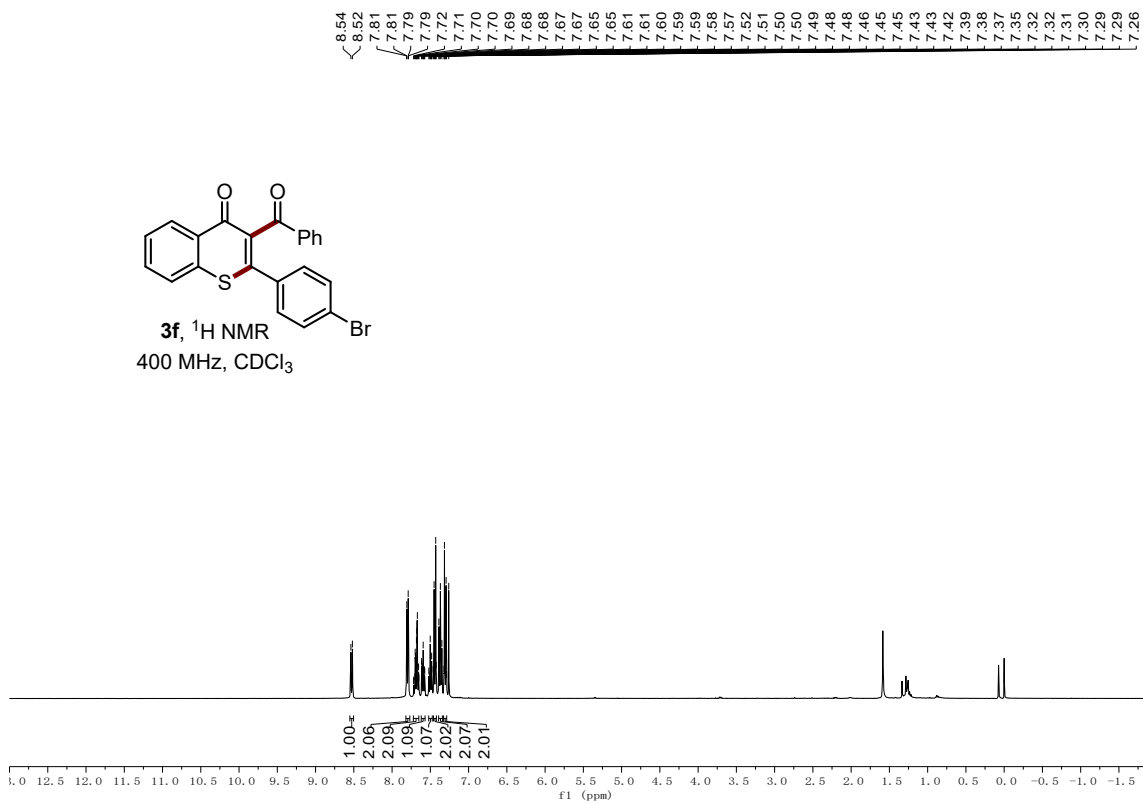

$^{13}\text{C NMR}$  spectrum of compound **3f** (101 MHz,  $\text{CDCl}_3$ ). The x-axis is labeled "f1 (ppm)" and ranges from 210 to -10. The spectrum shows several peaks in the aromatic region (125-155 ppm) and a solvent peak at 77.0 ppm.

| Chemical Shift (ppm) |
|----------------------|
| 194.52               |
| 178.76               |
| 150.62               |
| 137.21               |
| 136.84               |
| 135.46               |
| 133.66               |
| 133.56               |
| 132.24               |
| 132.06               |
| 130.88               |
| 130.13               |
| 129.14               |
| 128.70               |
| 128.29               |
| 126.09               |
| 125.04               |

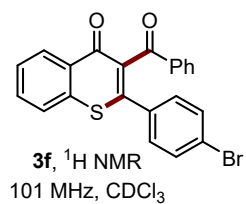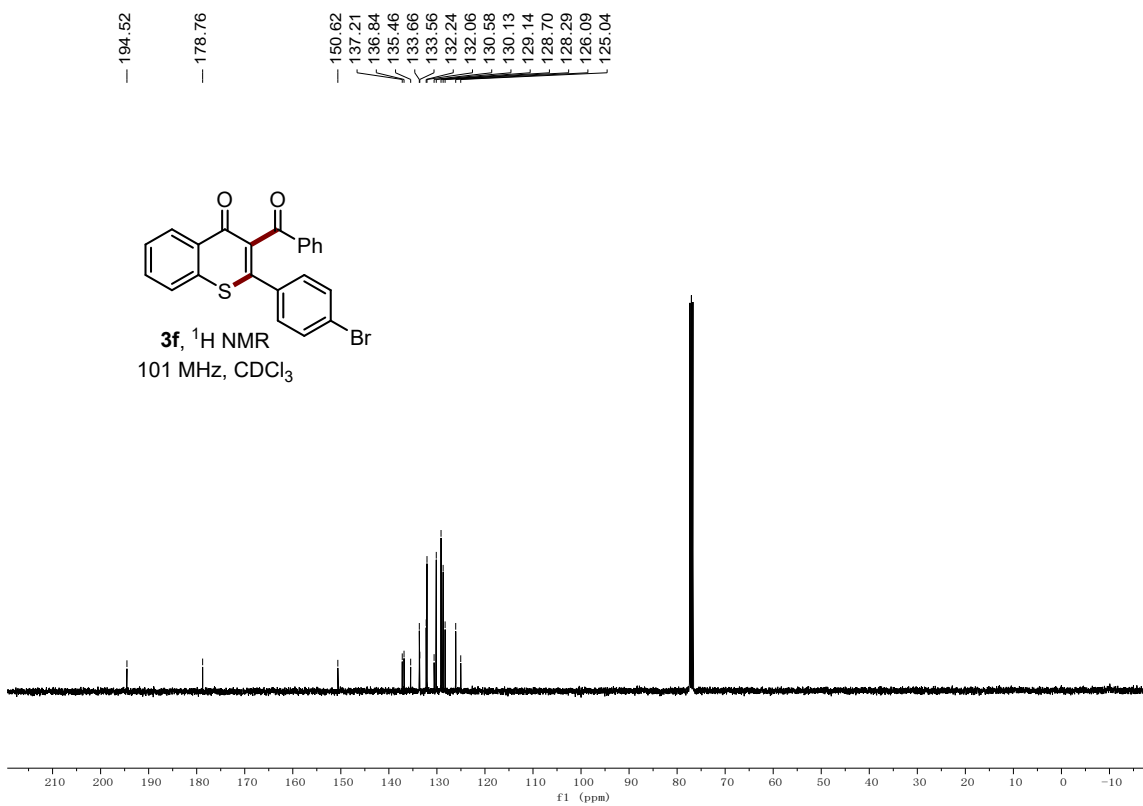



8.53  
7.85  
7.84  
7.83  
7.83  
7.69  
7.69  
7.68  
7.67  
7.66  
7.61  
7.60  
7.60  
7.60  
7.59  
7.58  
7.58  
7.58  
7.58  
7.57  
7.50  
7.49  
7.47  
7.47  
7.46  
7.39  
7.37  
7.35  
7.26  
7.26  
7.22  
7.20  
7.18  
7.03  
7.02  
7.02  
7.01  
7.01  
7.00  
7.00  
7.00  
6.94  
6.94  
6.93  
6.88  
6.88  
6.87  
6.87  
6.86  
6.86  
6.85  
6.85  
6.85  
3.63

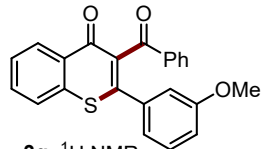

**3g**, <sup>1</sup>H NMR  
400 MHz, CDCl<sub>3</sub>

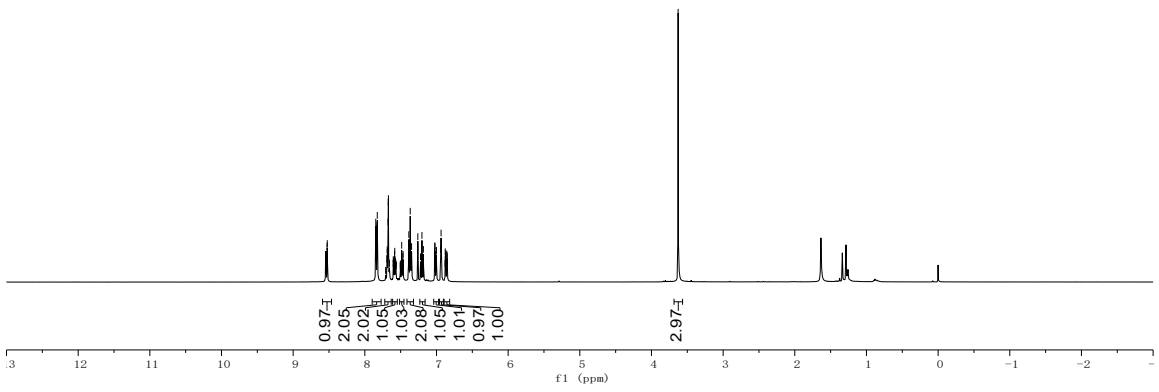

194.77  
178.90  
159.47  
137.94  
137.14  
135.91  
135.16  
133.41  
132.09  
130.67  
129.94  
129.19  
129.06  
128.60  
128.12  
126.10  
120.86  
116.67  
113.63  
55.19

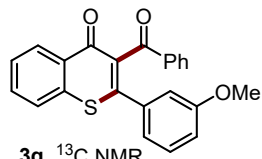

**3g**, <sup>13</sup>C NMR  
101 MHz, CDCl<sub>3</sub>

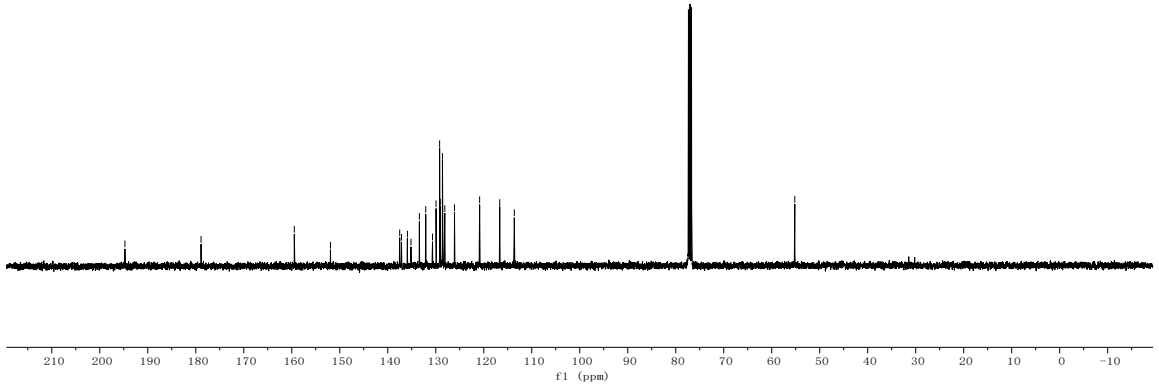

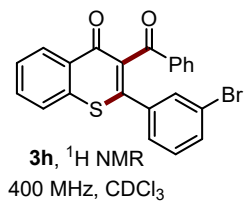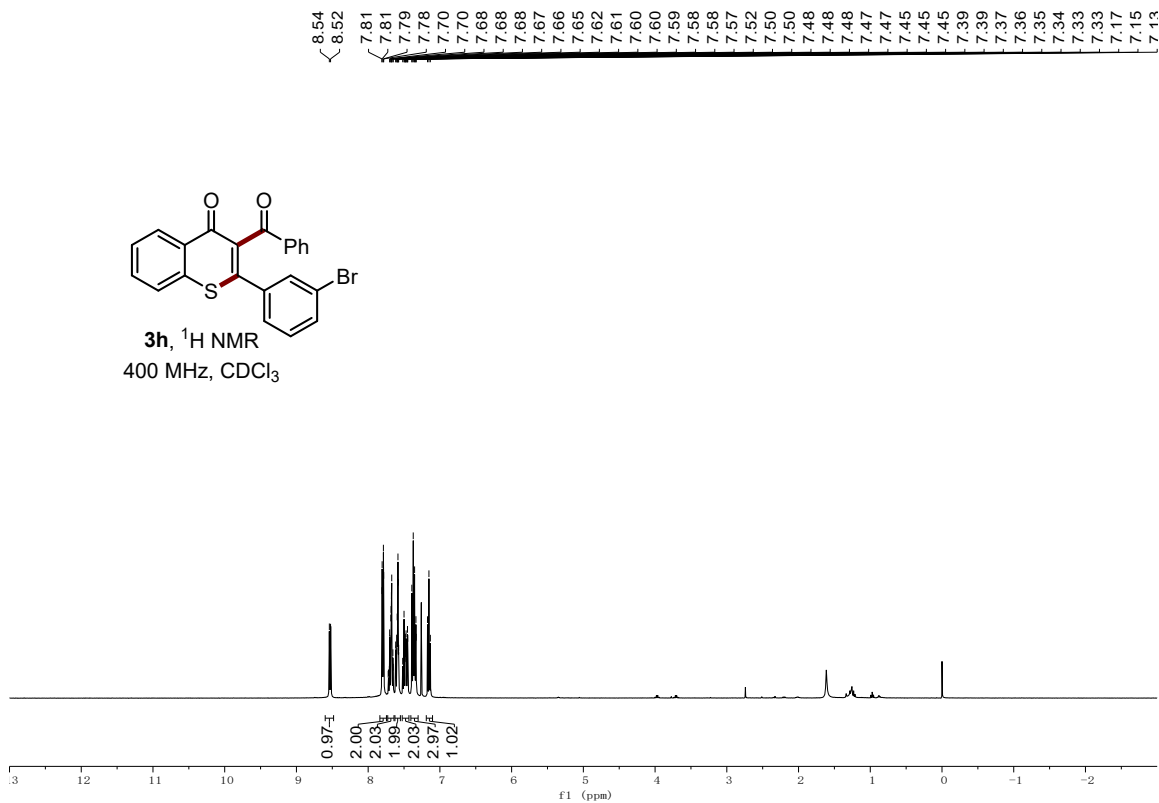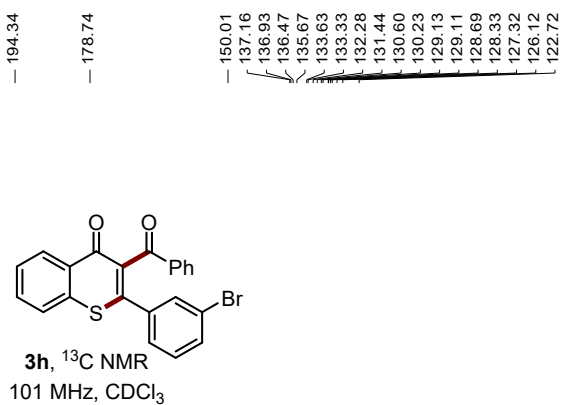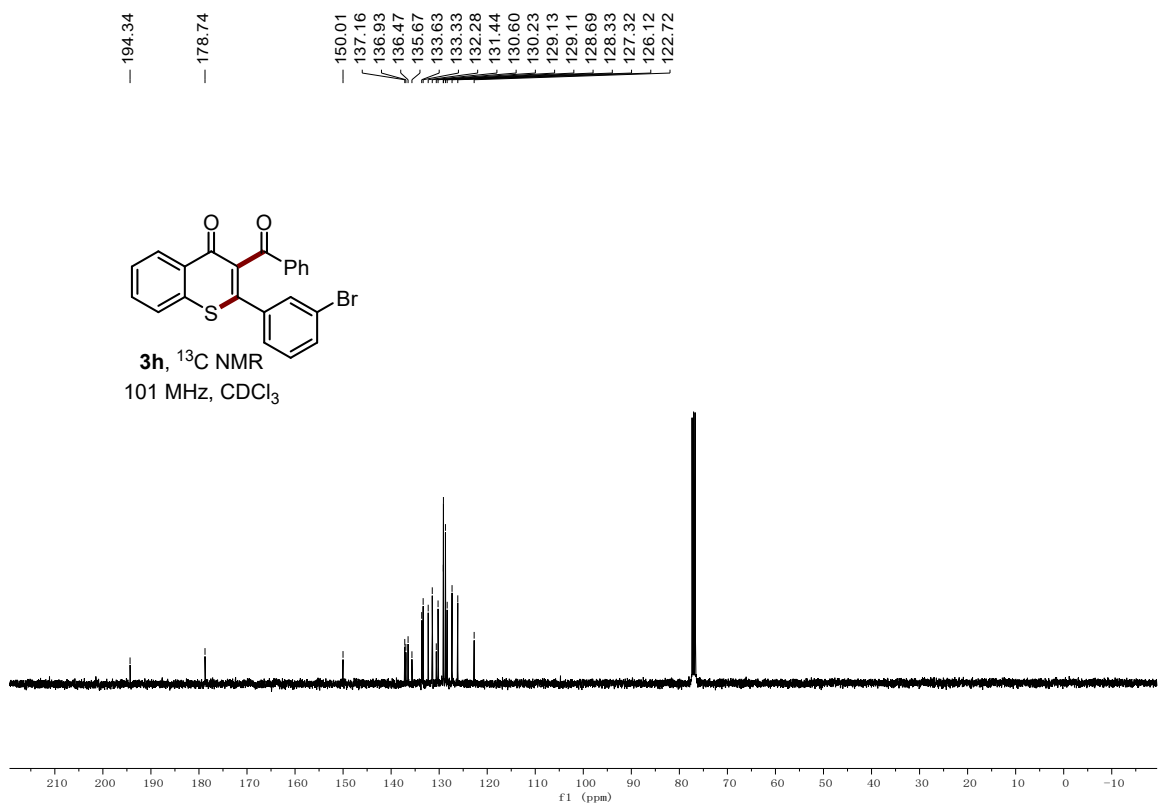

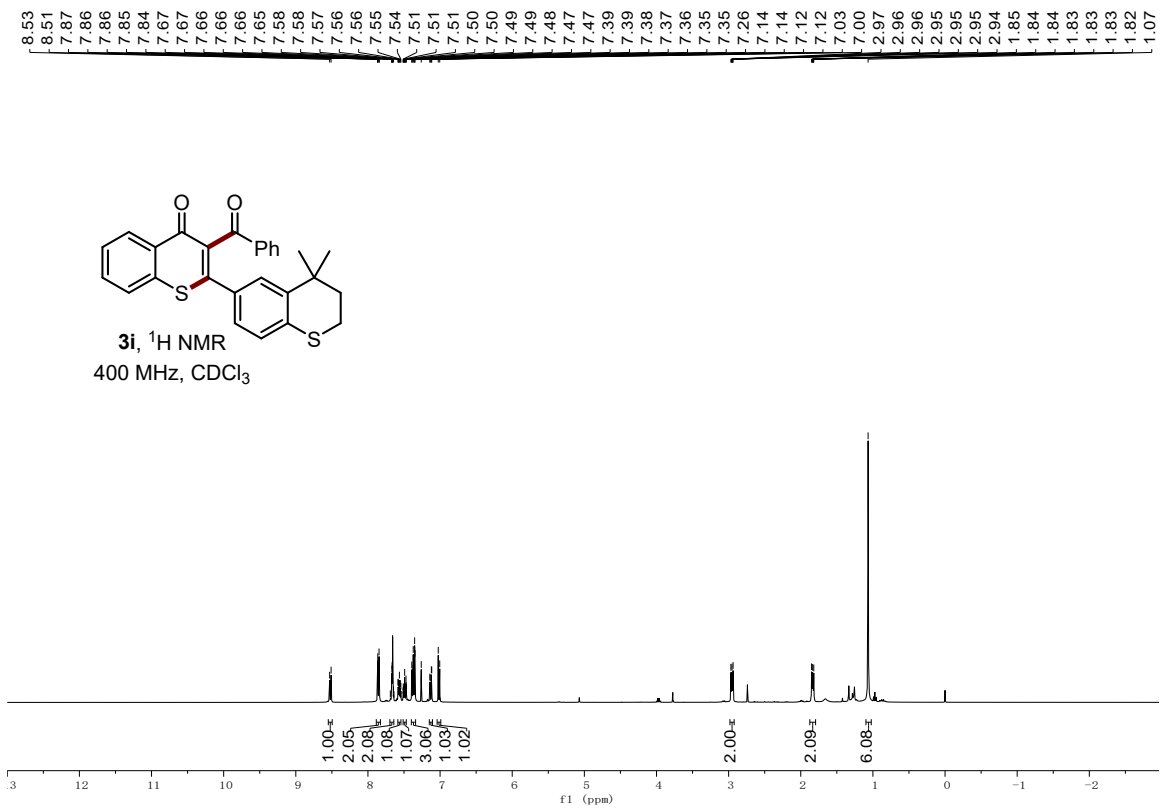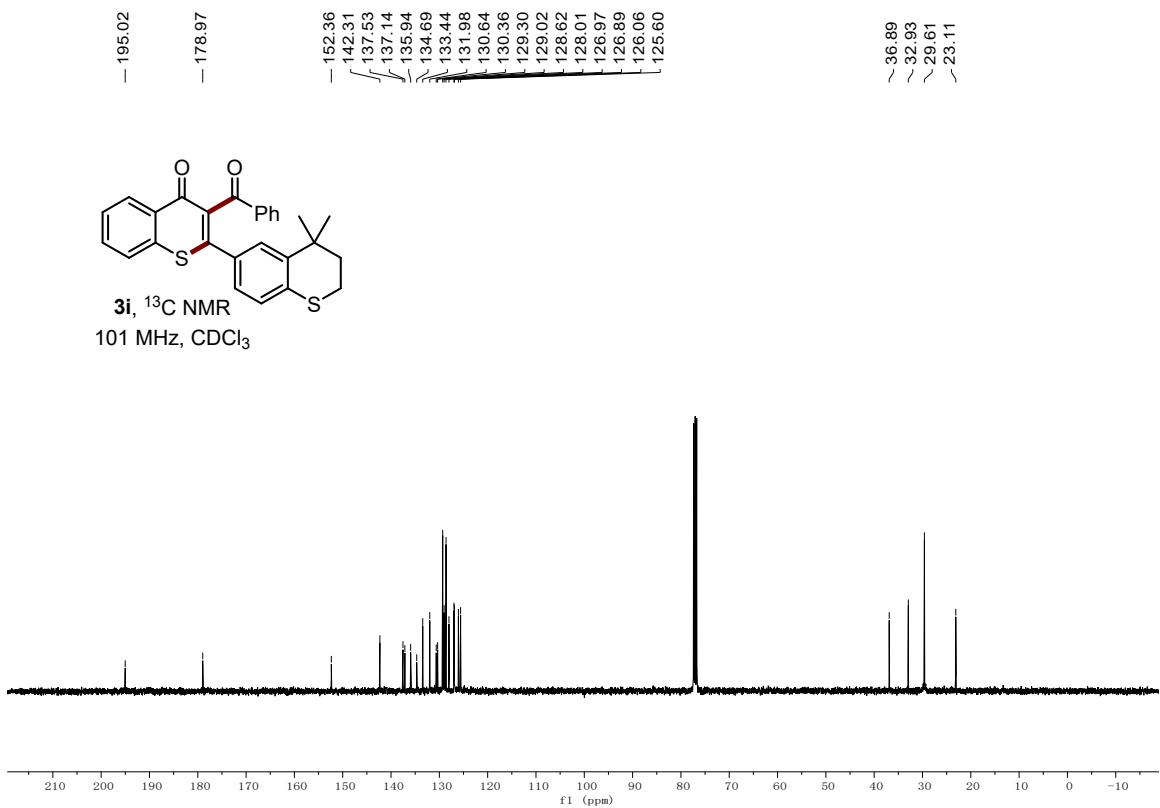

8.52  
8.52  
8.51  
8.50  
8.49  
8.49  
7.86  
7.85  
7.84  
7.84  
7.84  
7.70  
7.68  
7.67  
7.67  
7.66  
7.66  
7.66  
7.65  
7.64  
7.59  
7.58  
7.57  
7.57  
7.57  
7.56  
7.56  
7.55  
7.55  
7.52  
7.52  
7.51  
7.50  
7.50  
7.49  
7.48  
7.48  
7.48  
7.40  
7.39  
7.39  
7.37  
7.37  
7.37  
7.36  
7.35  
7.35  
7.35  
7.28  
7.27  
7.26  
7.26  
7.17  
7.16  
7.16

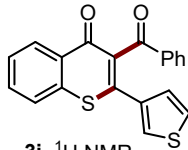

**3j**,  $^1\text{H}$  NMR  
400 MHz,  $\text{CDCl}_3$

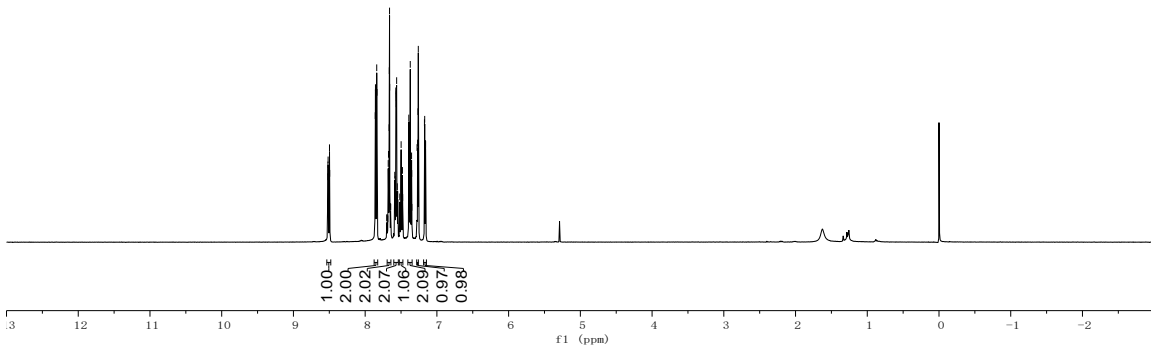

195.36  
179.06  
146.00  
137.23  
136.74  
134.95  
134.31  
133.59  
132.08  
130.58  
129.14  
129.03  
128.70  
128.09  
127.71  
127.37  
127.18  
126.00

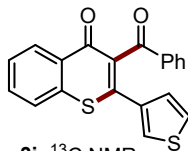

**3j**,  $^{13}\text{C}$  NMR  
101 MHz,  $\text{CDCl}_3$

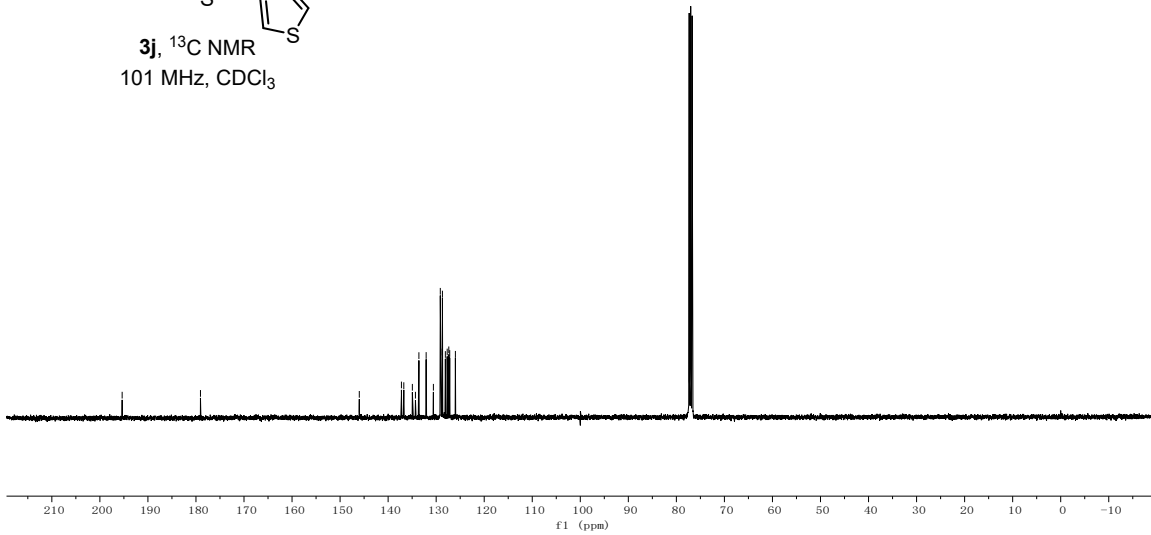

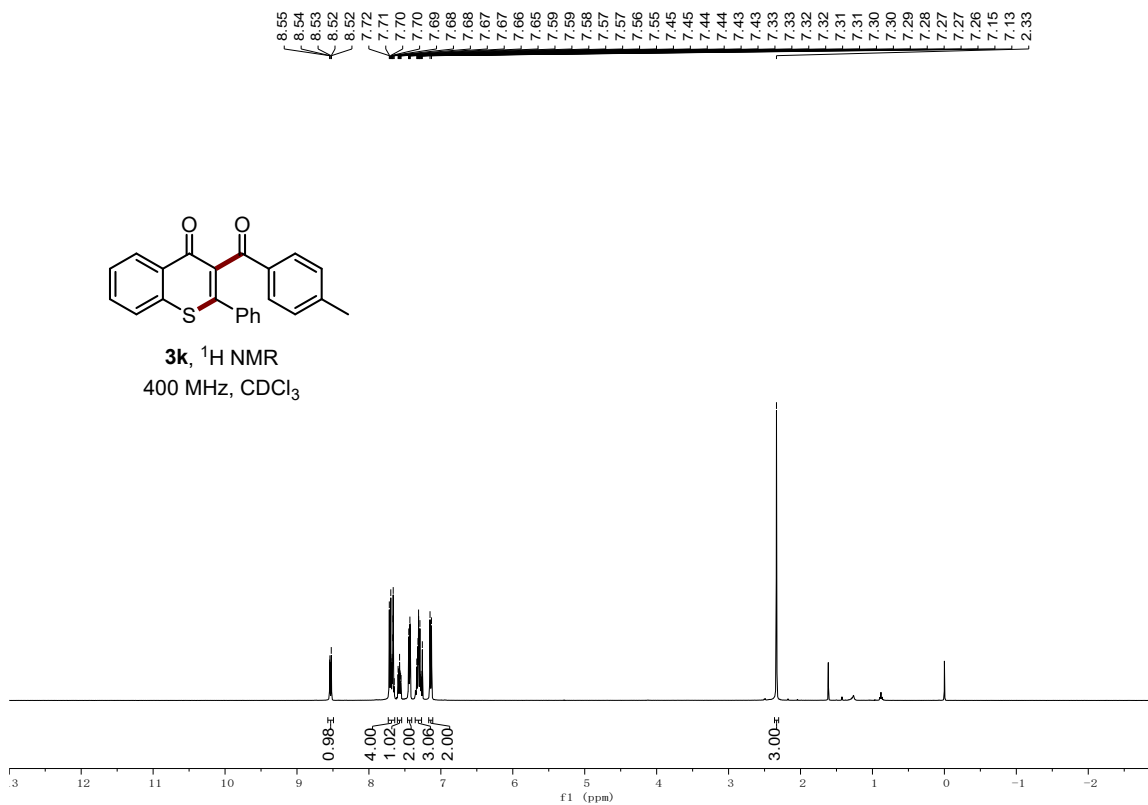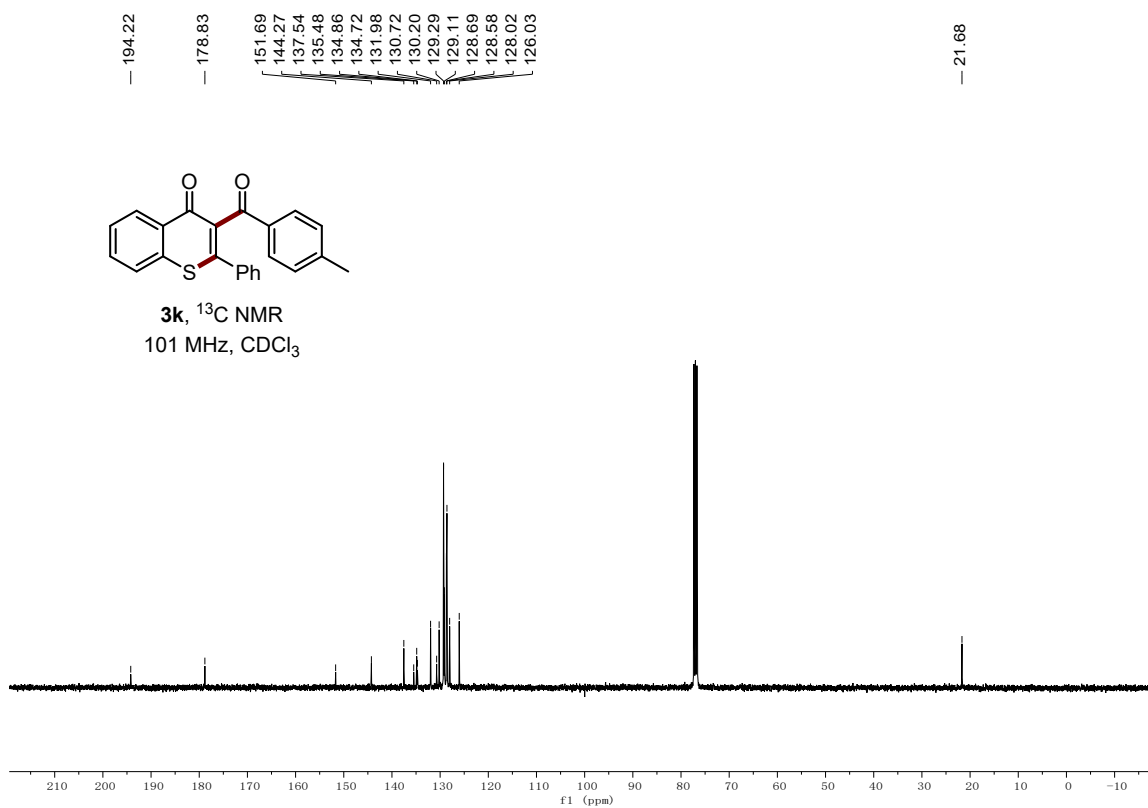

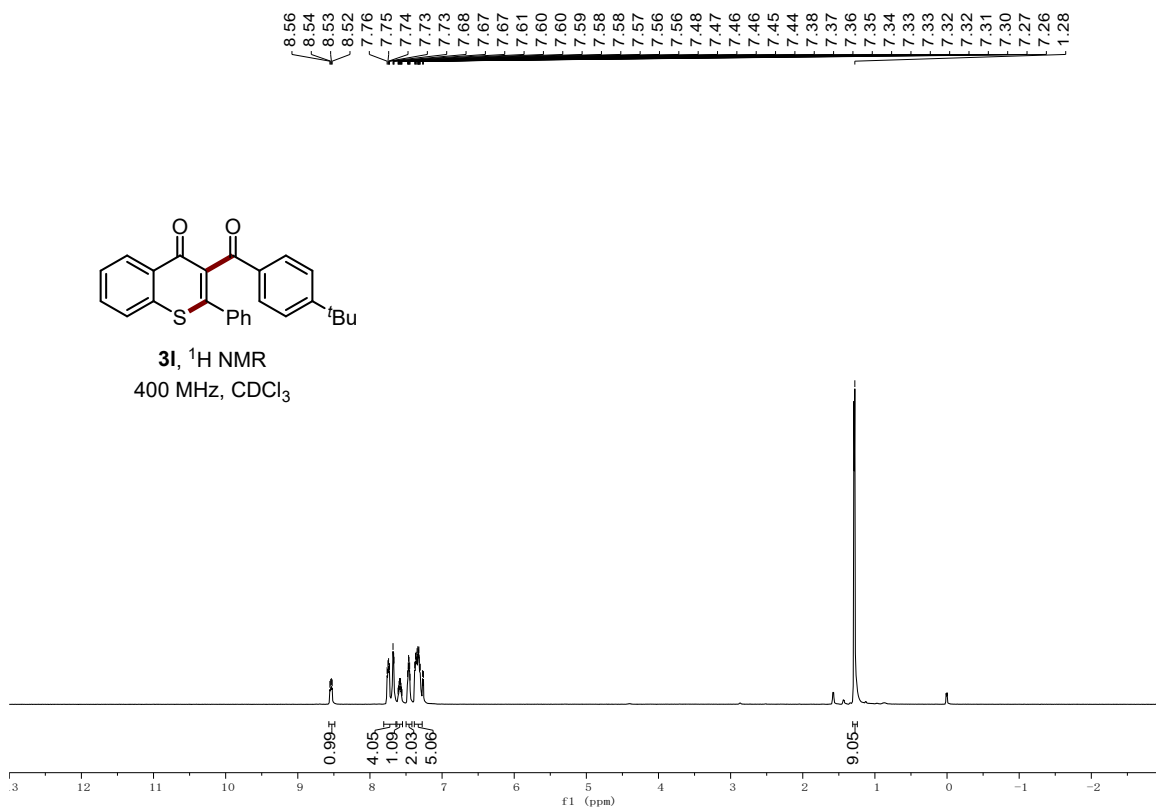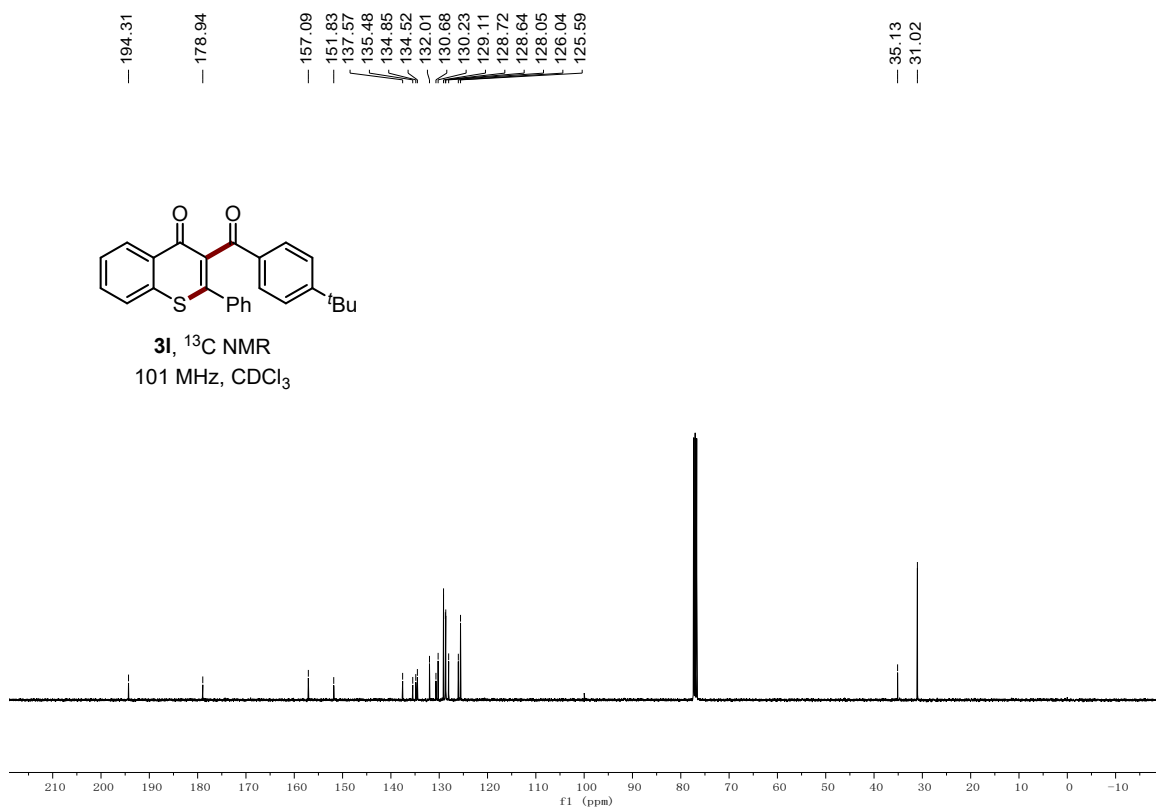

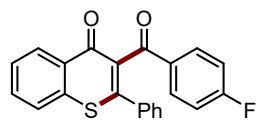

**3m**,  $^1\text{H}$  NMR  
400 MHz,  $\text{CDCl}_3$

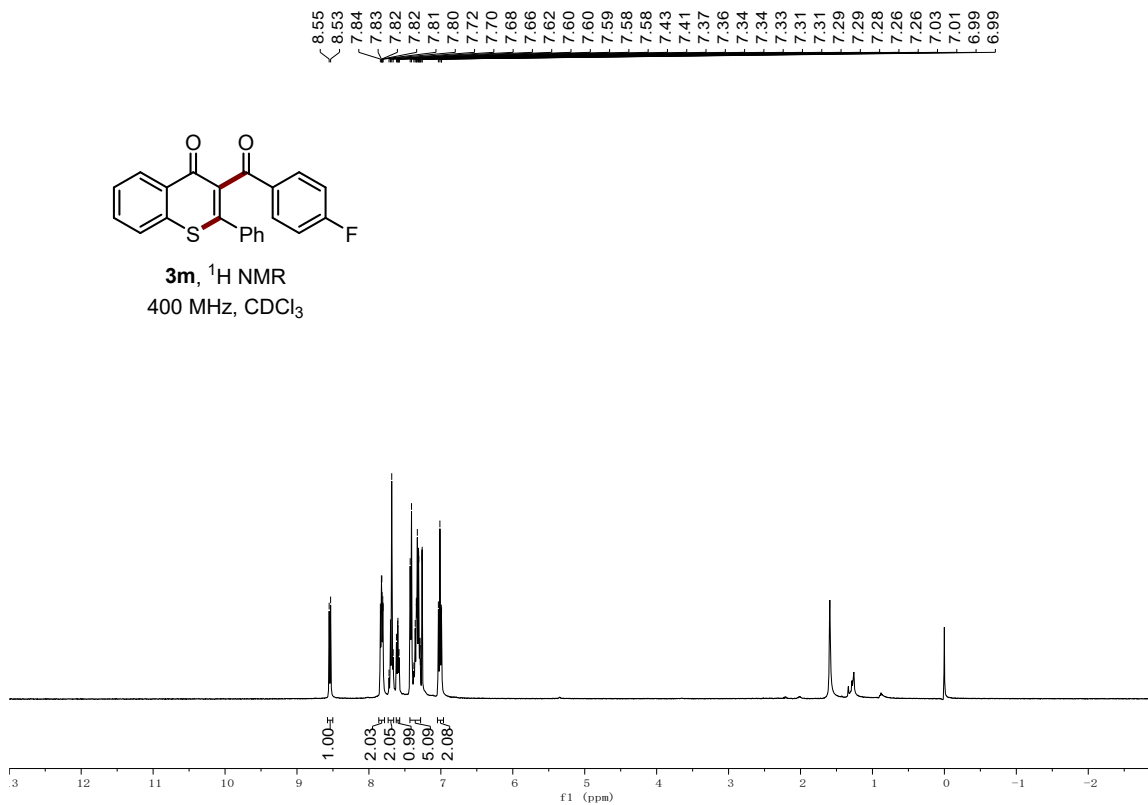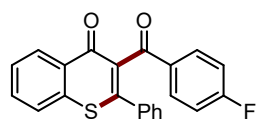

**3m**,  $^{13}\text{C}$  NMR  
101 MHz,  $\text{CDCl}_3$

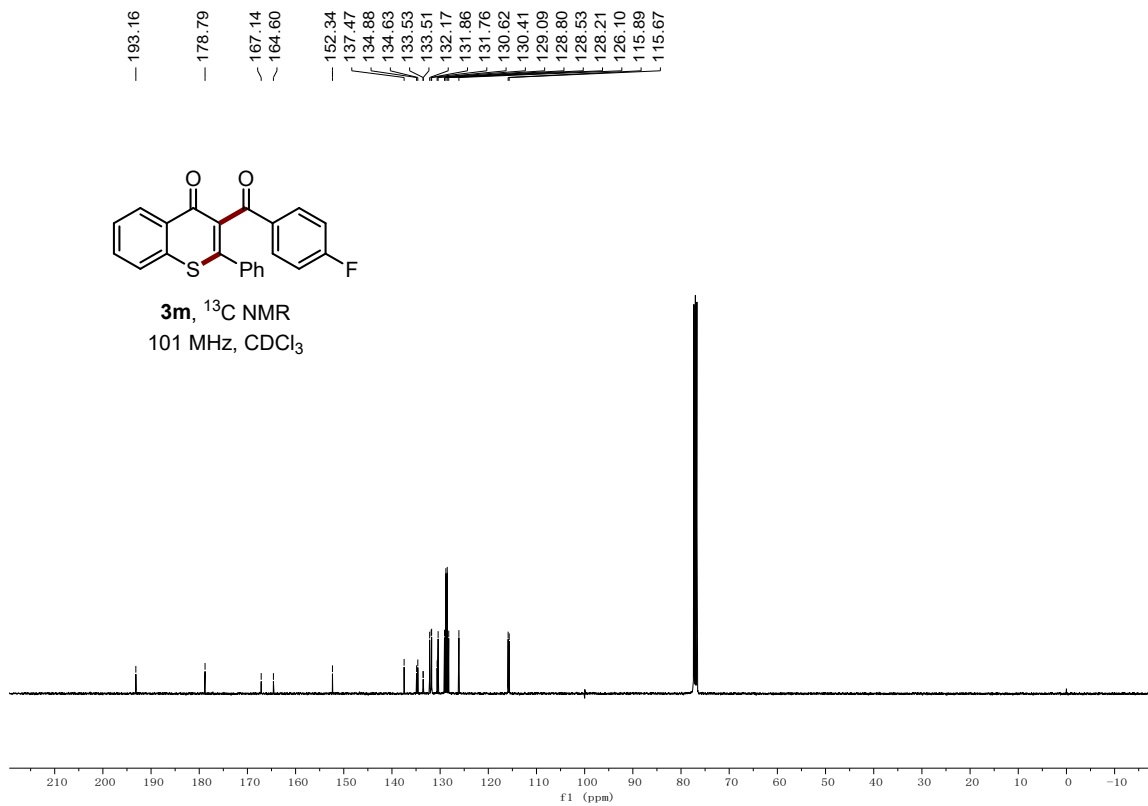

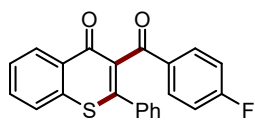

**3m**,  $^{19}\text{F}$  NMR  
376 MHz,  $\text{CDCl}_3$

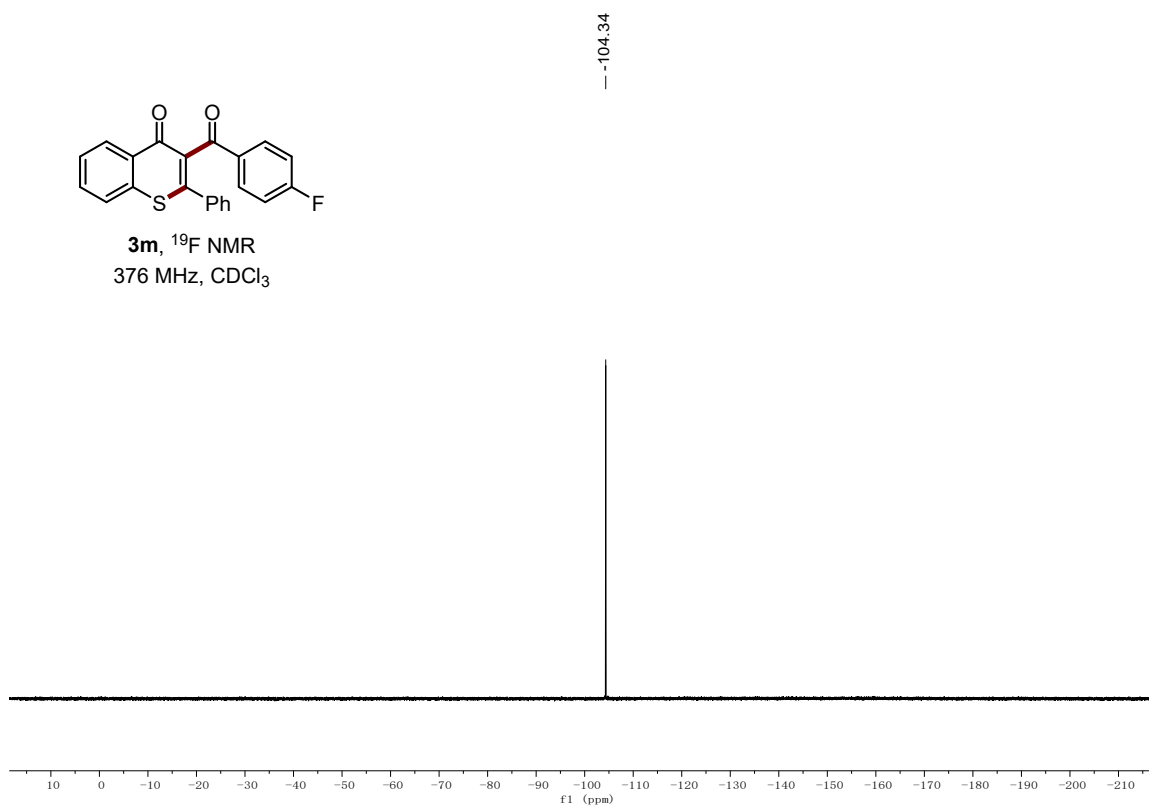



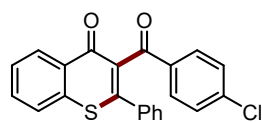

**3n**,  $^1\text{H}$  NMR  
400 MHz,  $\text{CDCl}_3$

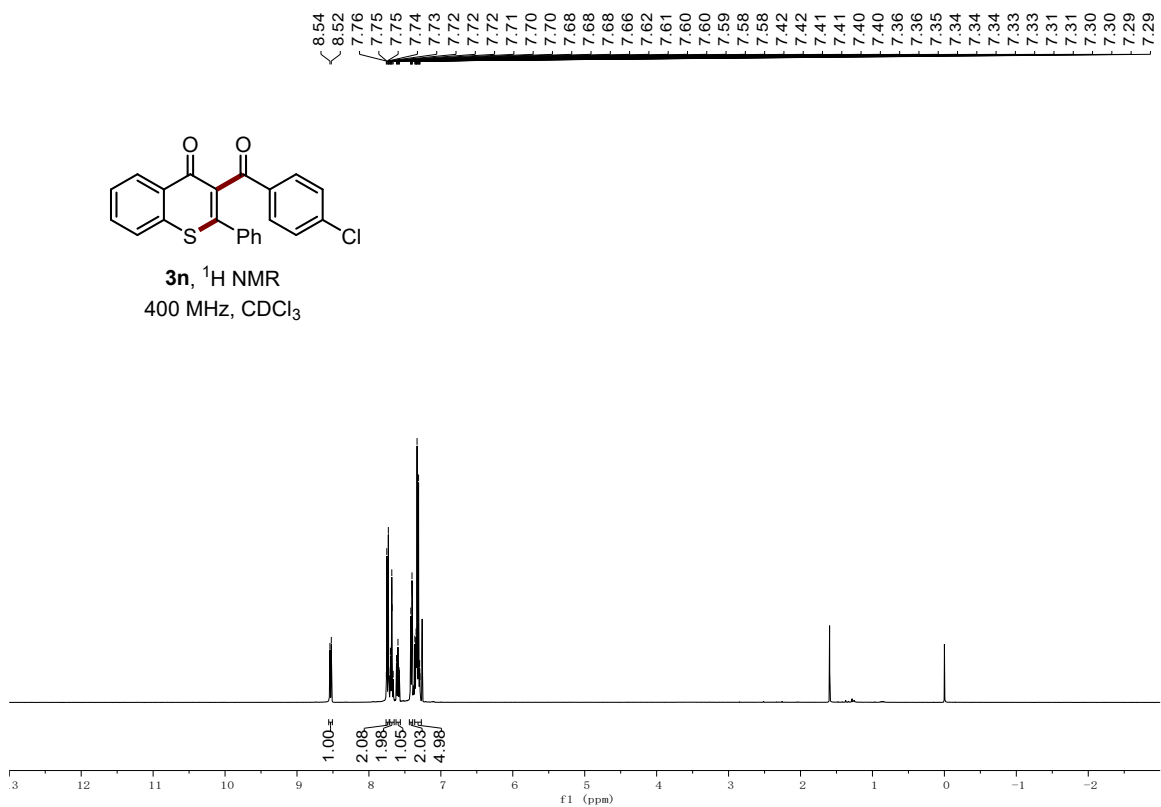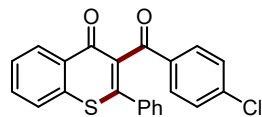

**3n**,  $^{13}\text{C}$  NMR  
101 MHz,  $\text{CDCl}_3$

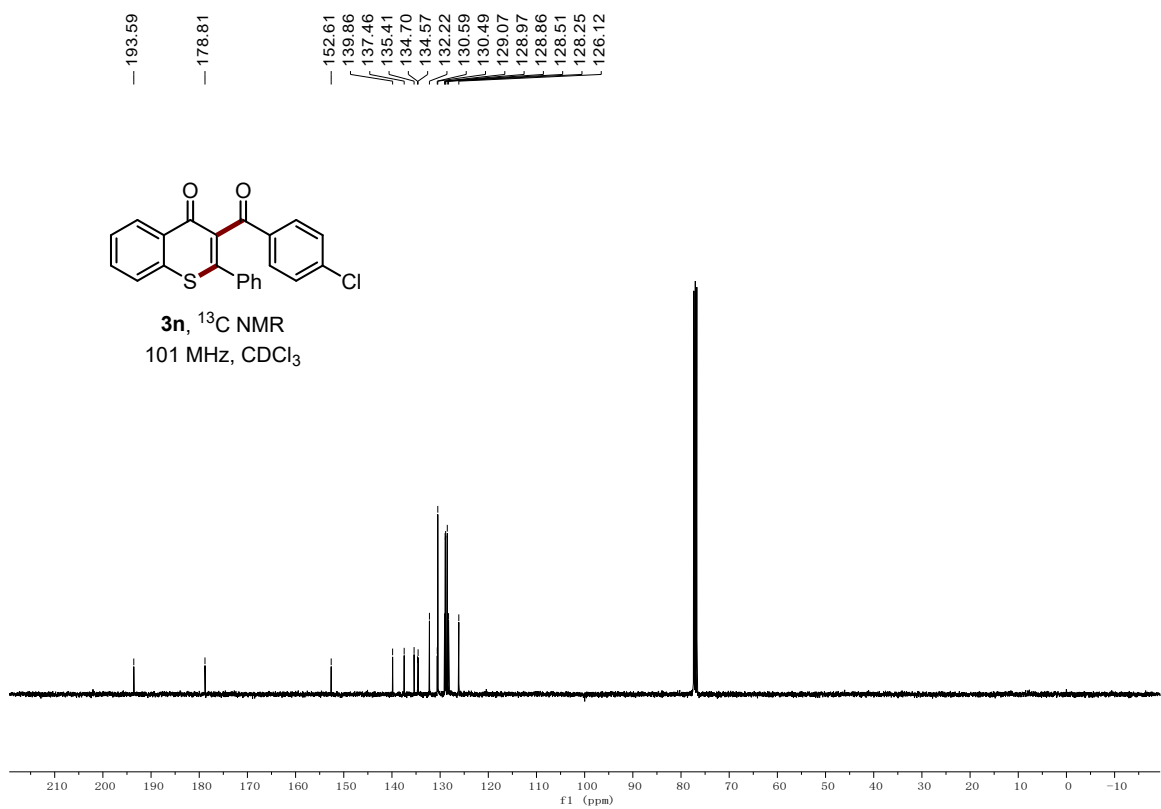

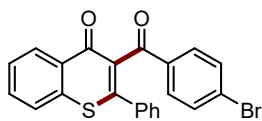

**3o**,  $^1\text{H}$  NMR  
400 MHz,  $\text{CDCl}_3$

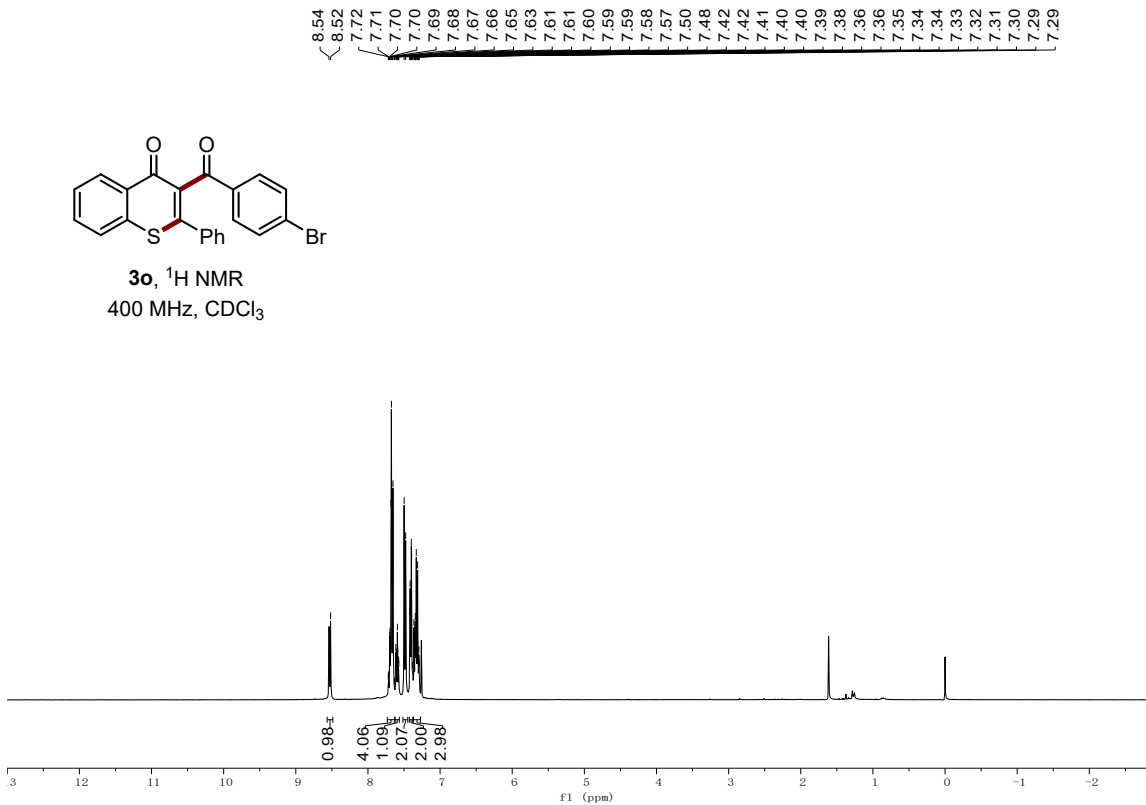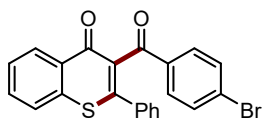

**3o**,  $^{13}\text{C}$  NMR  
101 MHz,  $\text{CDCl}_3$

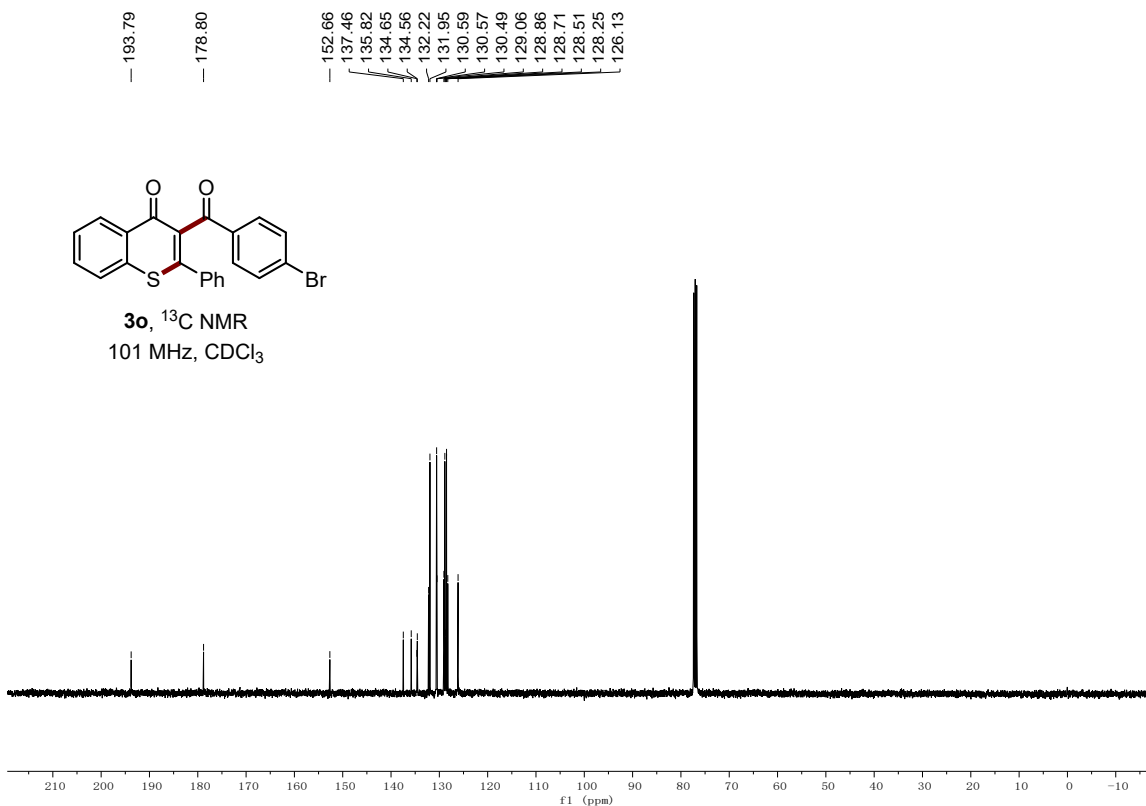

8.54  
8.52  
7.92  
7.90  
7.74  
7.74  
7.72  
7.72  
7.70  
7.70  
7.70  
7.68  
7.68  
7.63  
7.63  
7.62  
7.61  
7.61  
7.60  
7.59  
7.43  
7.42  
7.41  
7.41  
7.40  
7.40  
7.39  
7.39  
7.38  
7.37  
7.37  
7.36  
7.36  
7.35  
7.35  
7.34  
7.34  
7.34  
7.33  
7.33  
7.32  
7.32  
7.31  
7.31  
7.30

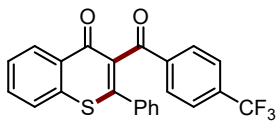

**3p**,  $^1\text{H}$  NMR  
400 MHz,  $\text{CDCl}_3$

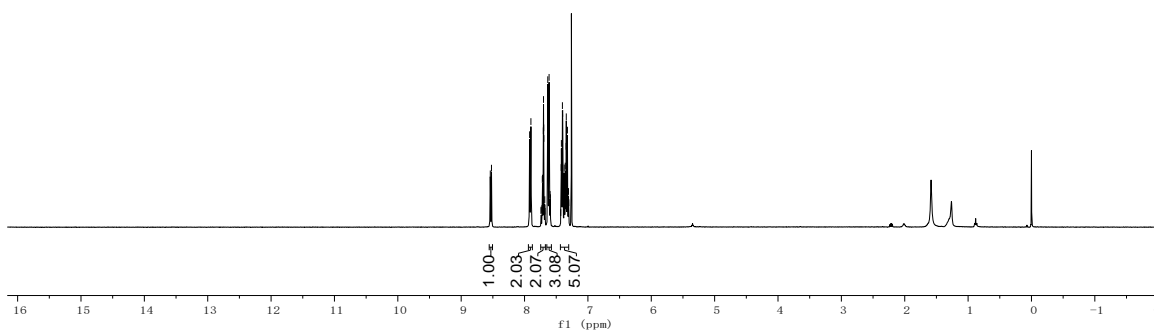

193.84  
178.87  
153.29  
139.67  
137.46  
134.78  
134.56  
134.35  
134.13  
132.32  
130.59  
130.57  
129.29  
129.04  
128.91  
128.51  
128.35  
126.25  
124.44  
122.63  
120.83

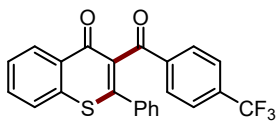

**3p**,  $^{13}\text{C}$  NMR  
151 MHz,  $\text{CDCl}_3$

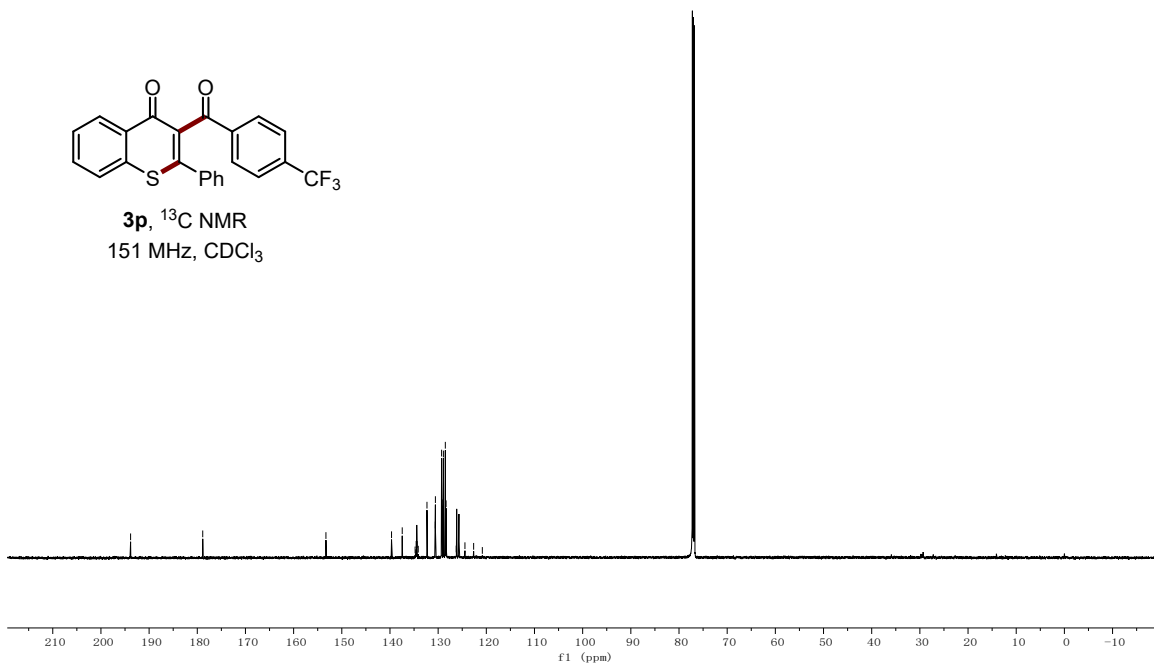

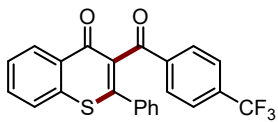

**3p**,  $^{13}\text{F}$  NMR  
376 MHz,  $\text{CDCl}_3$

—63.15

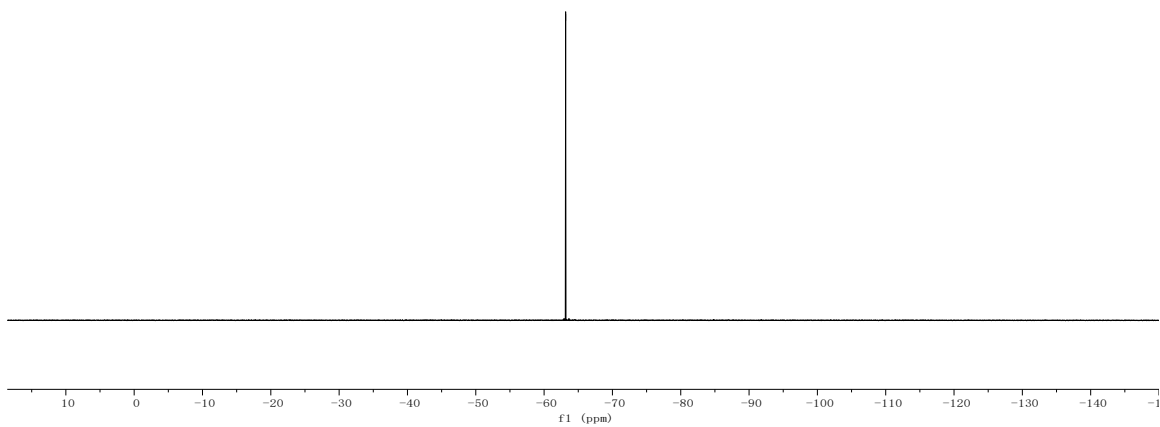

8.57  
8.55  
8.28  
7.93  
7.92  
7.91  
7.90  
7.86  
7.84  
7.82  
7.81  
7.80  
7.79  
7.71  
7.71  
7.70  
7.69  
7.69  
7.62  
7.61  
7.61  
7.60  
7.60  
7.59  
7.58  
7.57  
7.55  
7.55  
7.53  
7.53  
7.50  
7.48  
7.47  
7.47  
7.47  
7.46  
7.45  
7.45  
7.45  
7.30  
7.29  
7.28  
7.27  
7.26  
7.24  
7.23

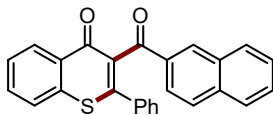

**3q**,  $^1\text{H}$  NMR  
400 MHz,  $\text{CDCl}_3$

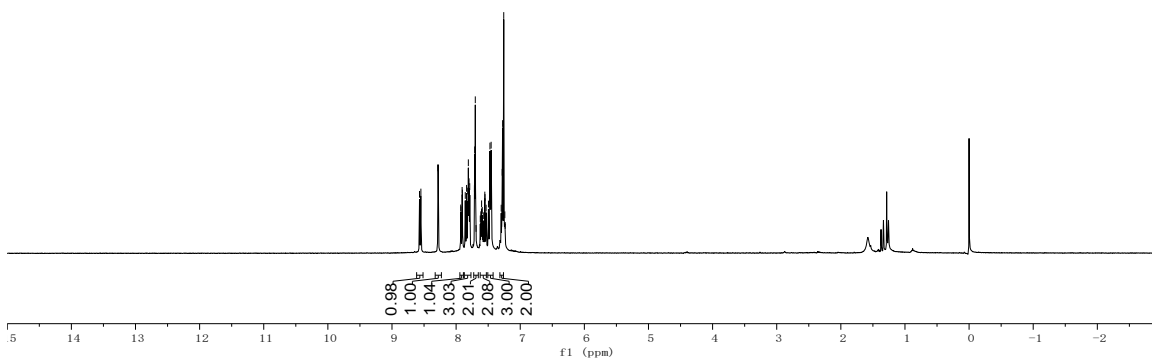

194.73  
178.95  
152.21  
137.58  
135.83  
135.35  
134.80  
134.53  
132.53  
132.11  
131.48  
130.74  
130.31  
129.73  
129.17  
128.78  
128.56  
128.54  
128.52  
128.15  
127.74  
126.57  
126.12  
124.31

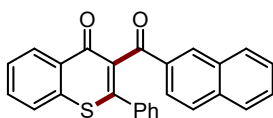

**3q**,  $^{13}\text{C}$  NMR  
151 MHz,  $\text{CDCl}_3$

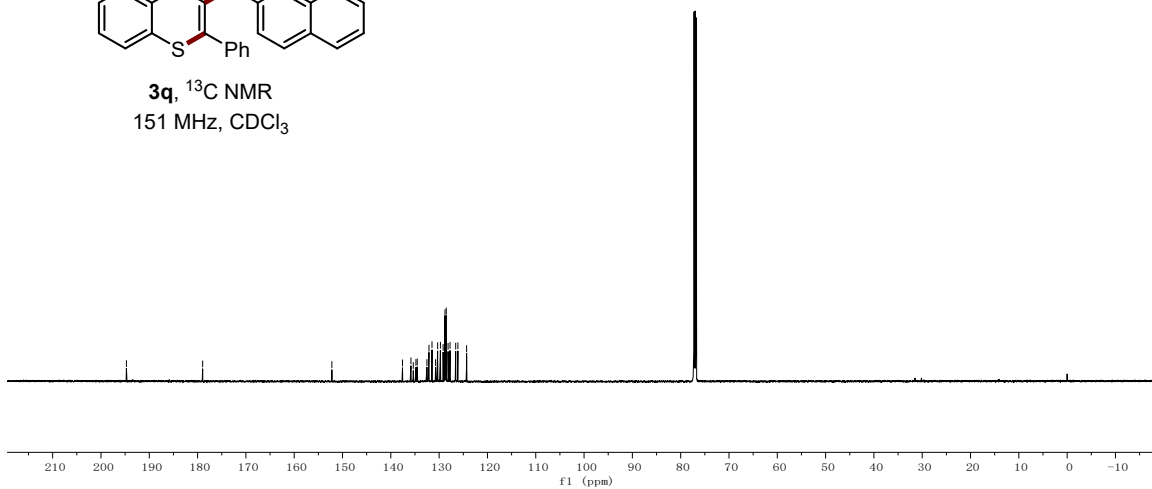

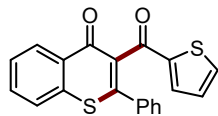

**3r**,  $^1\text{H}$  NMR  
400 MHz,  $\text{CDCl}_3$

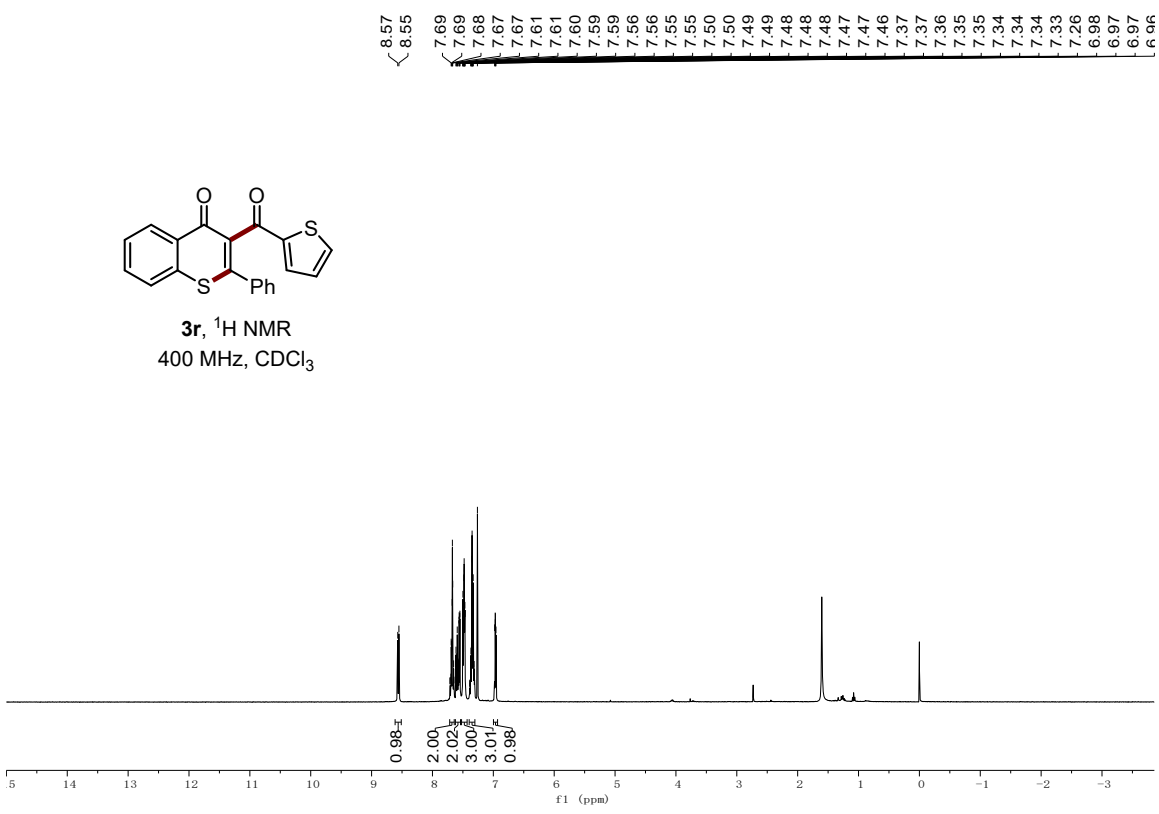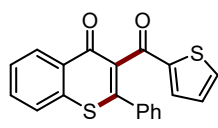

**3r**,  $^{13}\text{C}$  NMR  
101 MHz,  $\text{CDCl}_3$

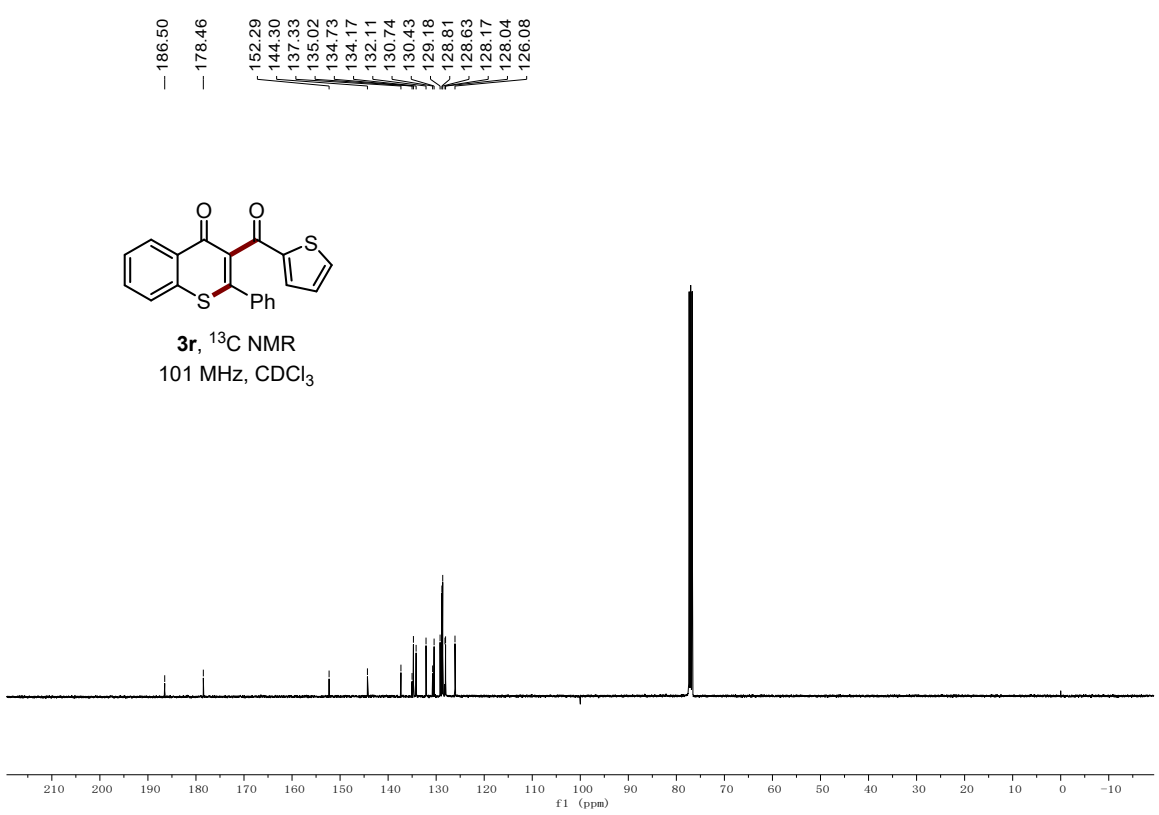

8.57  
8.56  
8.55  
8.55  
8.54  
8.54  
8.36  
8.35  
8.34  
8.33  
8.33  
7.88  
7.87  
7.86  
7.84  
7.84  
7.55  
7.54  
7.53  
7.52  
7.47  
7.46  
7.45  
7.44  
7.44  
7.43  
7.43  
7.41  
7.40  
7.39  
7.38  
7.35  
7.35  
7.34  
7.34  
7.33  
7.33  
7.32  
7.31  
7.26  
4.32  
4.28  
4.17  
4.12

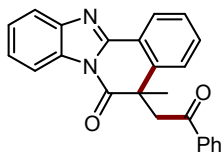

**5a**, <sup>1</sup>H NMR  
400 MHz, CDCl<sub>3</sub>

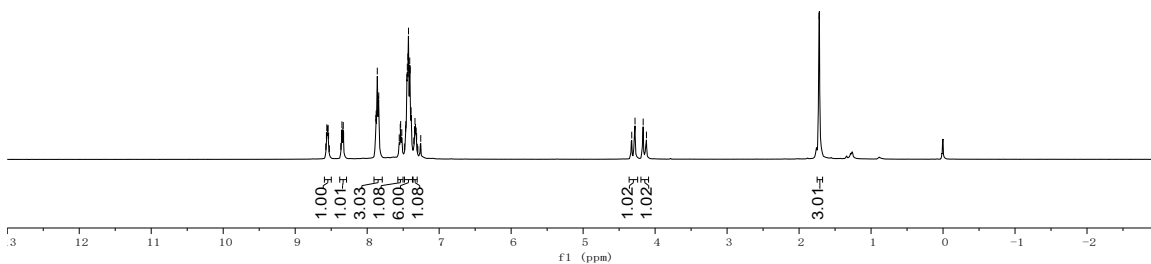

196.08  
173.28  
150.09  
144.14  
141.96  
135.69  
133.64  
131.71  
131.61  
128.66  
128.07  
127.57  
126.40  
125.63  
125.34  
124.39  
123.10  
119.79  
115.65  
49.31  
46.18  
30.24

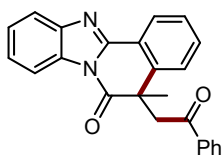

**5a**, <sup>13</sup>C NMR  
101 MHz, CDCl<sub>3</sub>

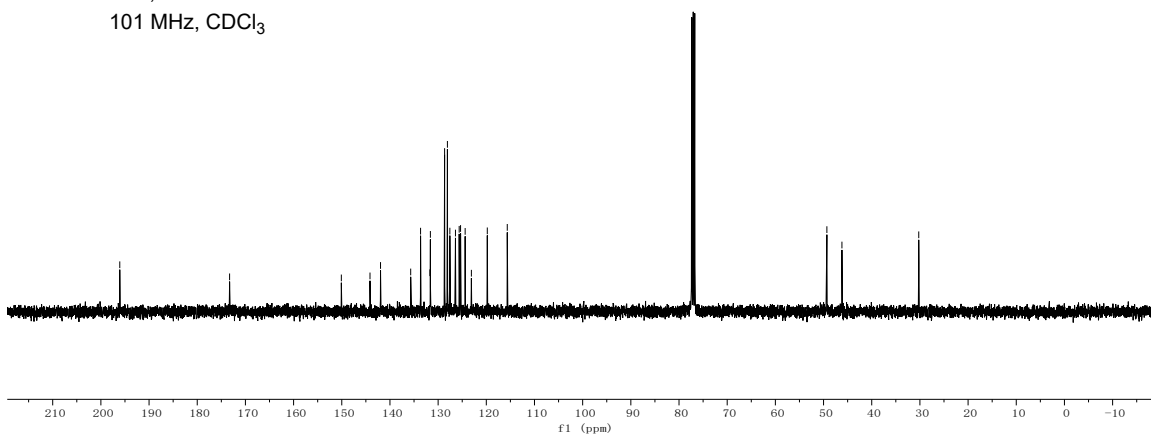

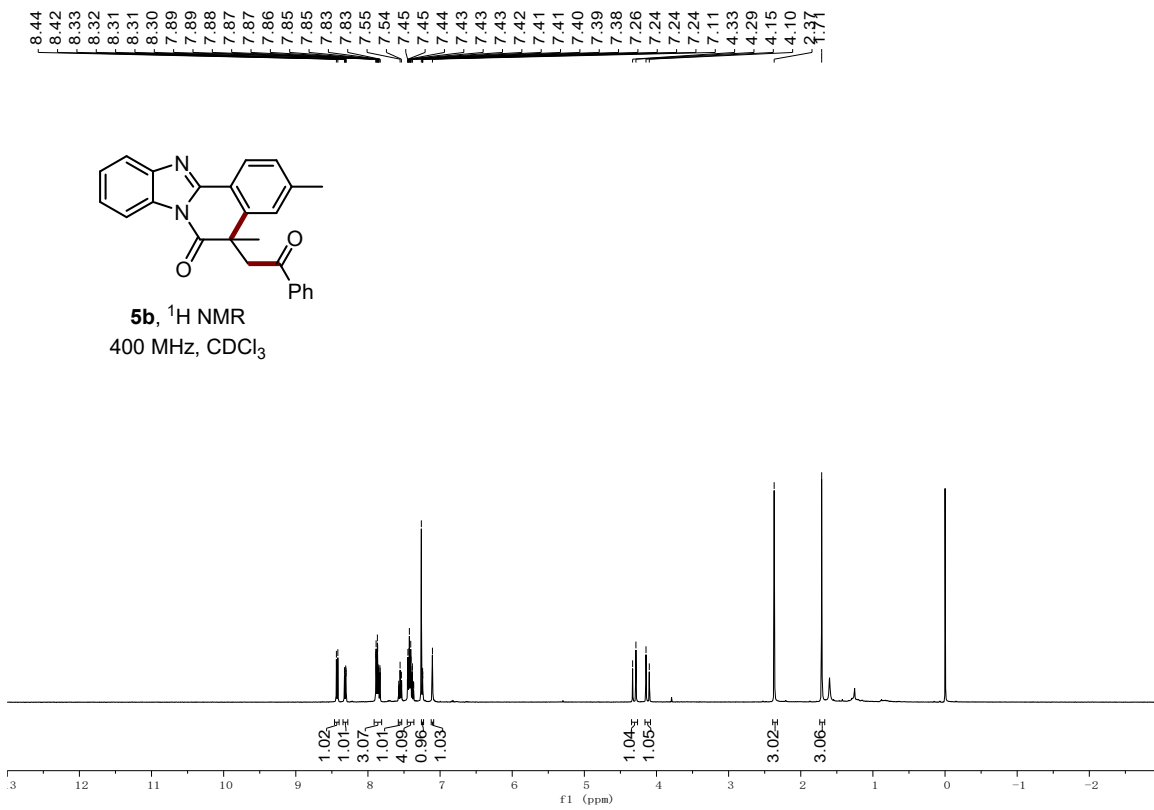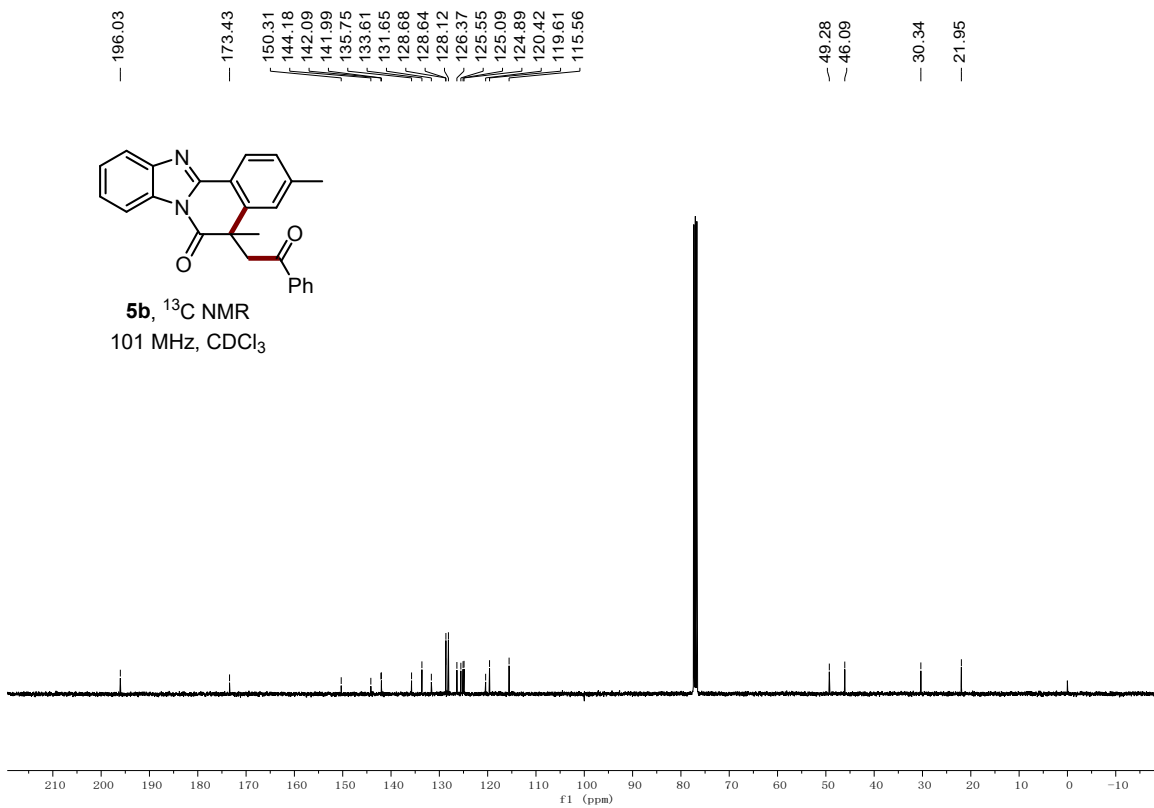



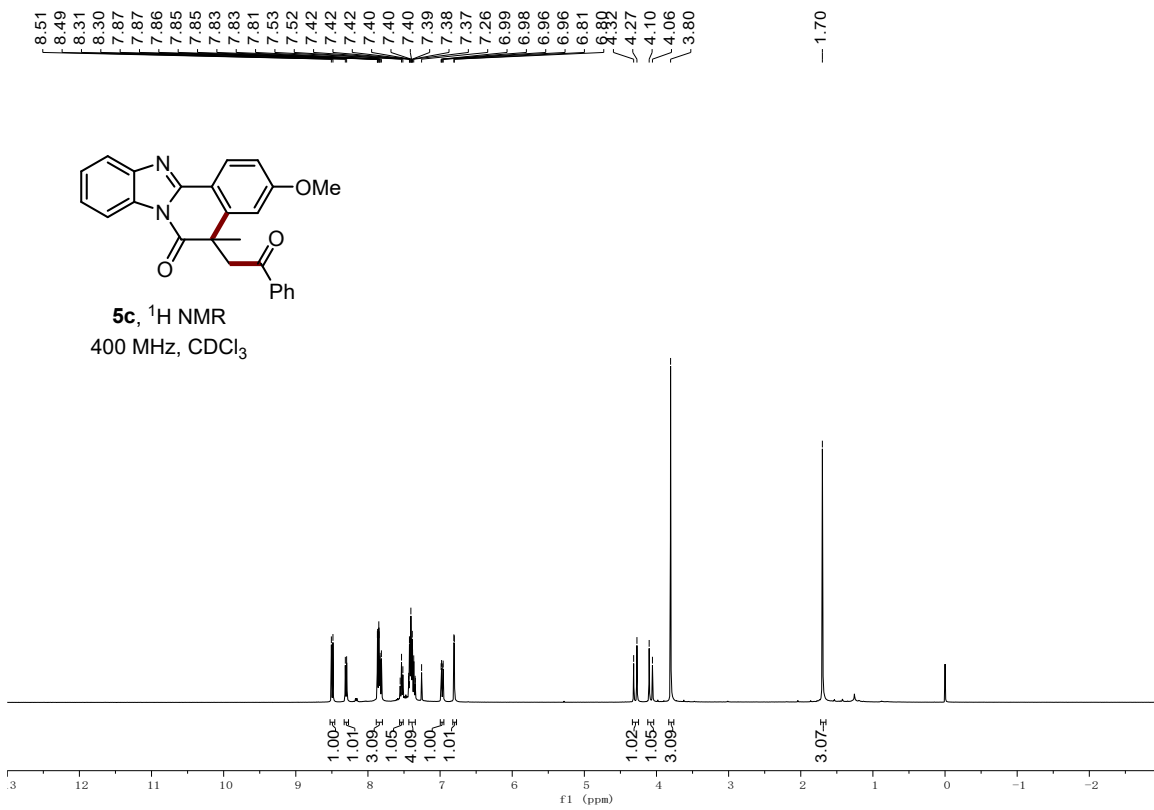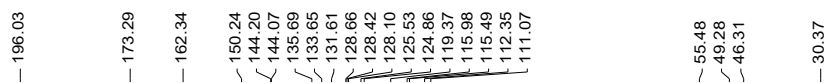

8.46  
8.44  
8.34  
8.34  
8.32  
8.32  
7.87  
7.87  
7.86  
7.86  
7.85  
7.84  
7.84  
7.84  
7.84  
7.57  
7.56  
7.55  
7.55  
7.53  
7.53  
7.52  
7.46  
7.44  
7.44  
7.43  
7.42  
7.41  
7.41  
7.40  
7.40  
7.39  
7.39  
7.37  
7.37  
7.32  
7.32  
7.30  
7.30  
7.26  
7.14  
7.13  
4.30  
4.26  
4.17  
4.13  
2.93  
2.91  
2.89  
2.87  
2.86  
2.84  
1.72  
1.21  
1.21  
1.19  
1.19

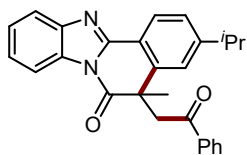

**5d**,  $^1\text{H}$  NMR  
400 MHz,  $\text{CDCl}_3$

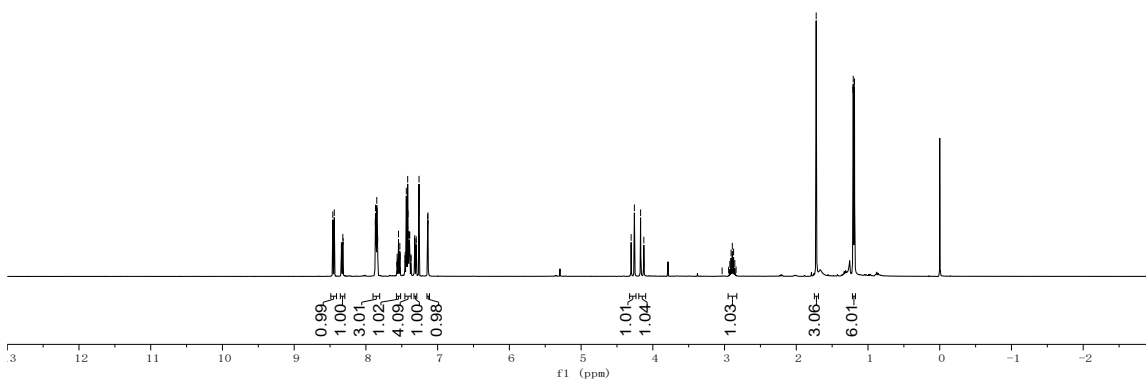

196.27  
173.48  
152.88  
150.28  
144.20  
141.94  
135.88  
133.57  
131.66  
128.65  
128.04  
126.50  
125.82  
125.54  
125.09  
122.49  
120.75  
119.63  
115.59  
49.23  
46.32  
34.40  
30.38  
23.76  
23.66

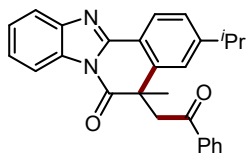

**5d**,  $^{13}\text{C}$  NMR  
101 MHz,  $\text{CDCl}_3$

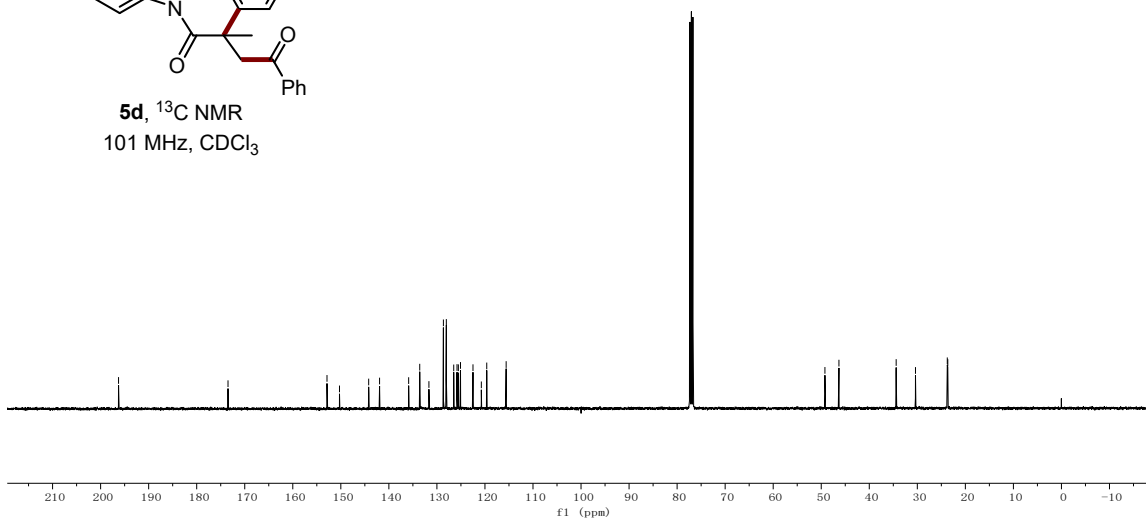

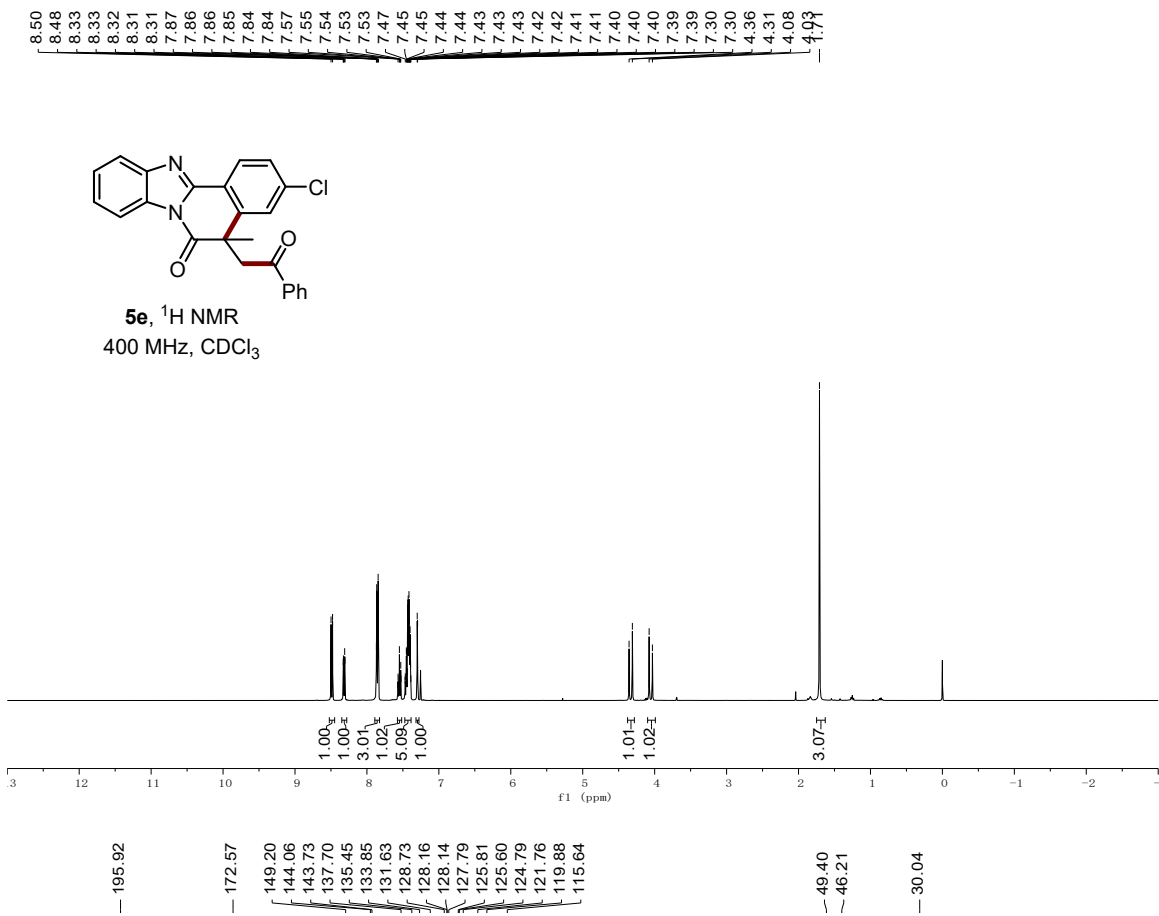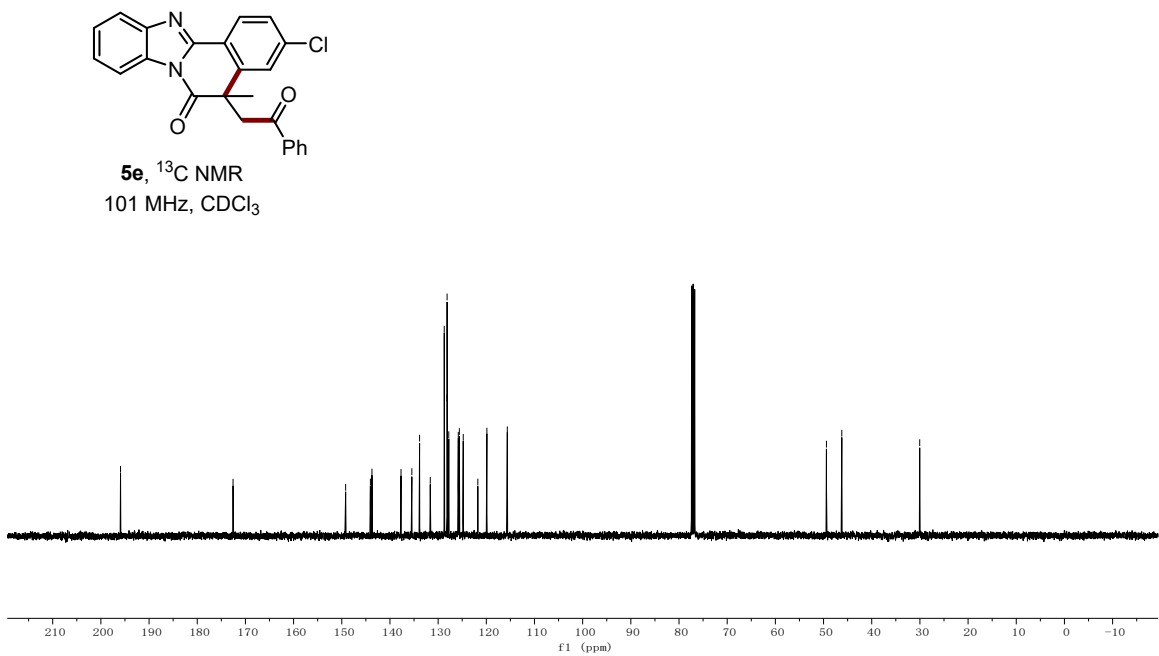

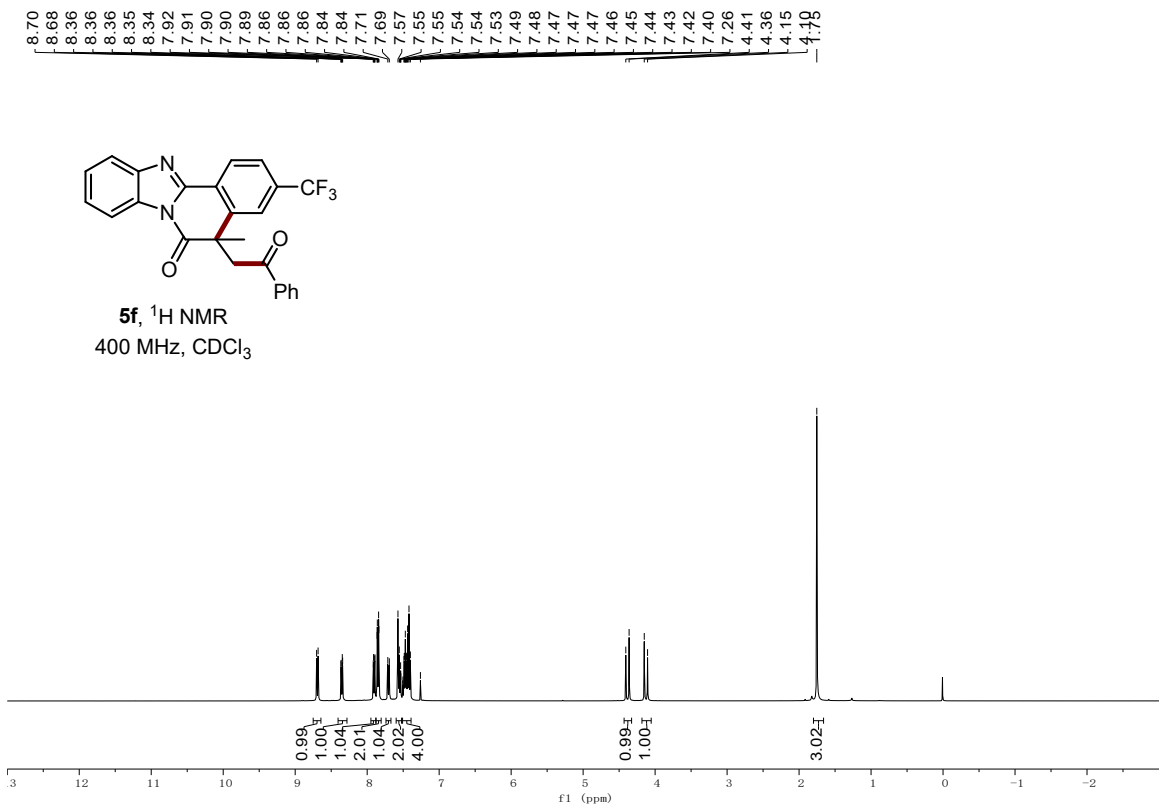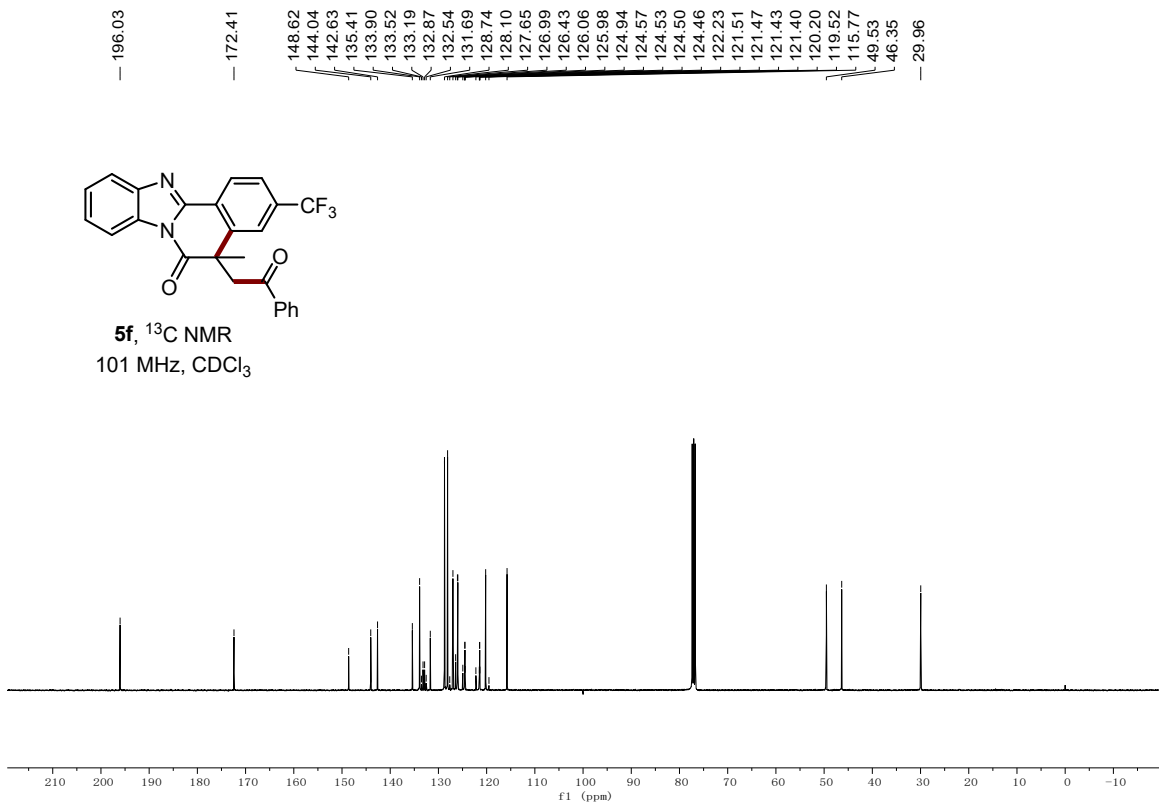

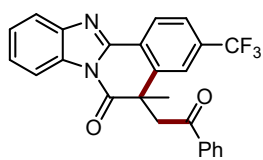

**5f**,  $^{19}\text{F}$  NMR  
376 MHz,  $\text{CDCl}_3$

--62.75

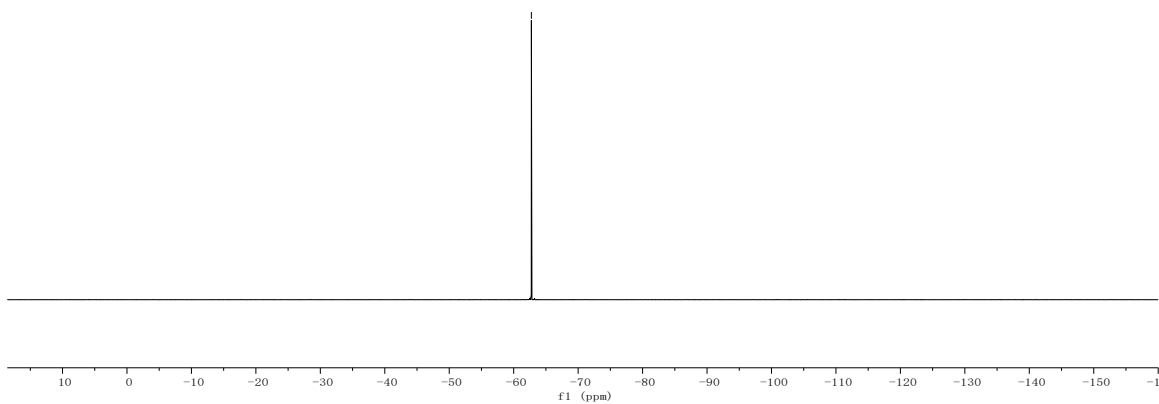

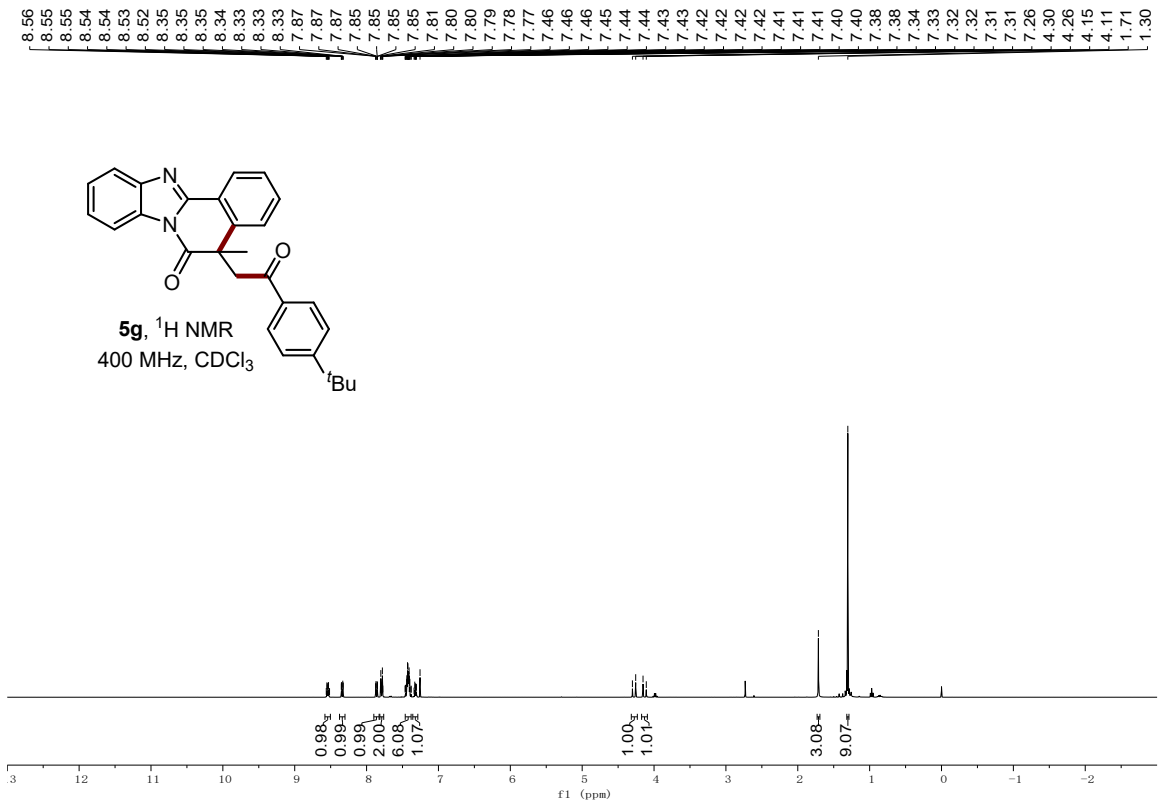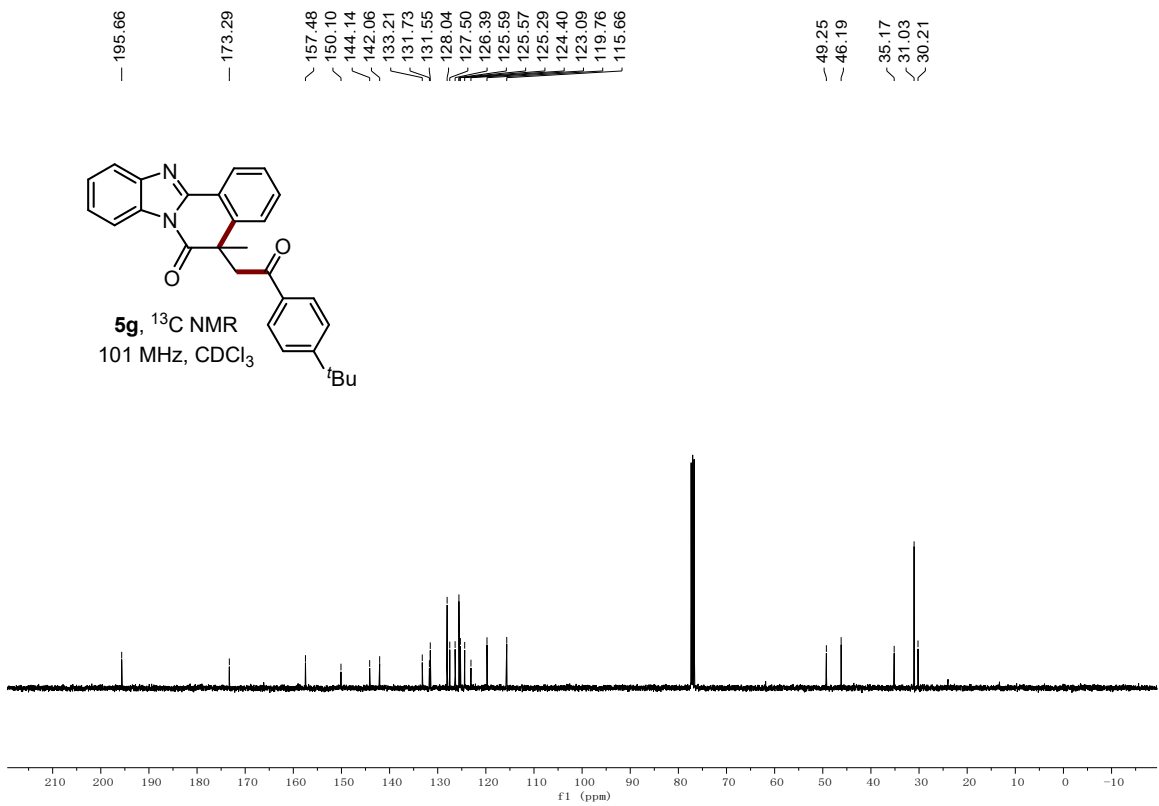

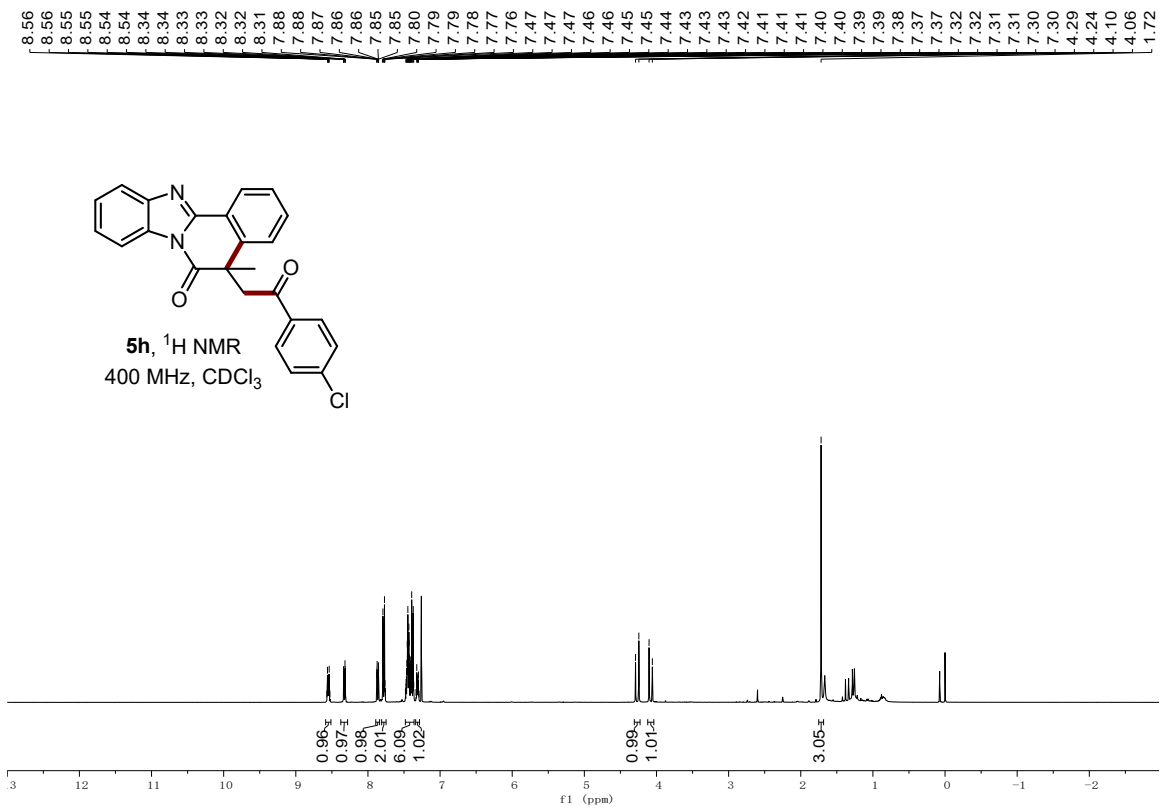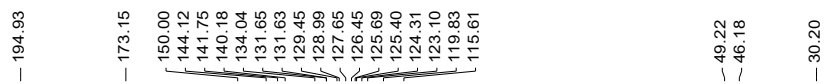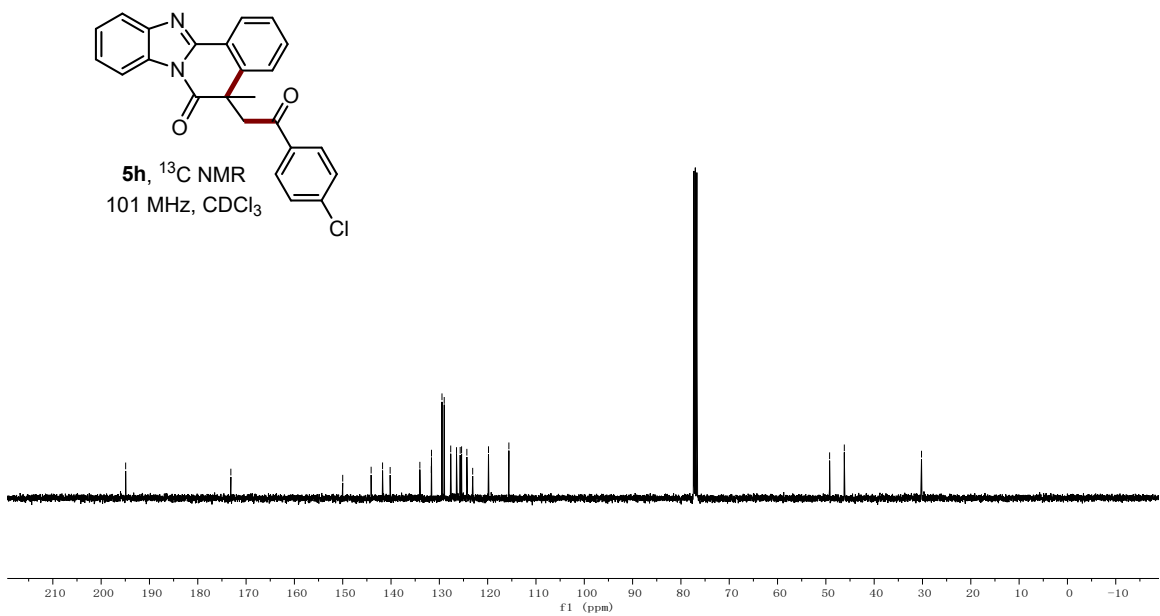

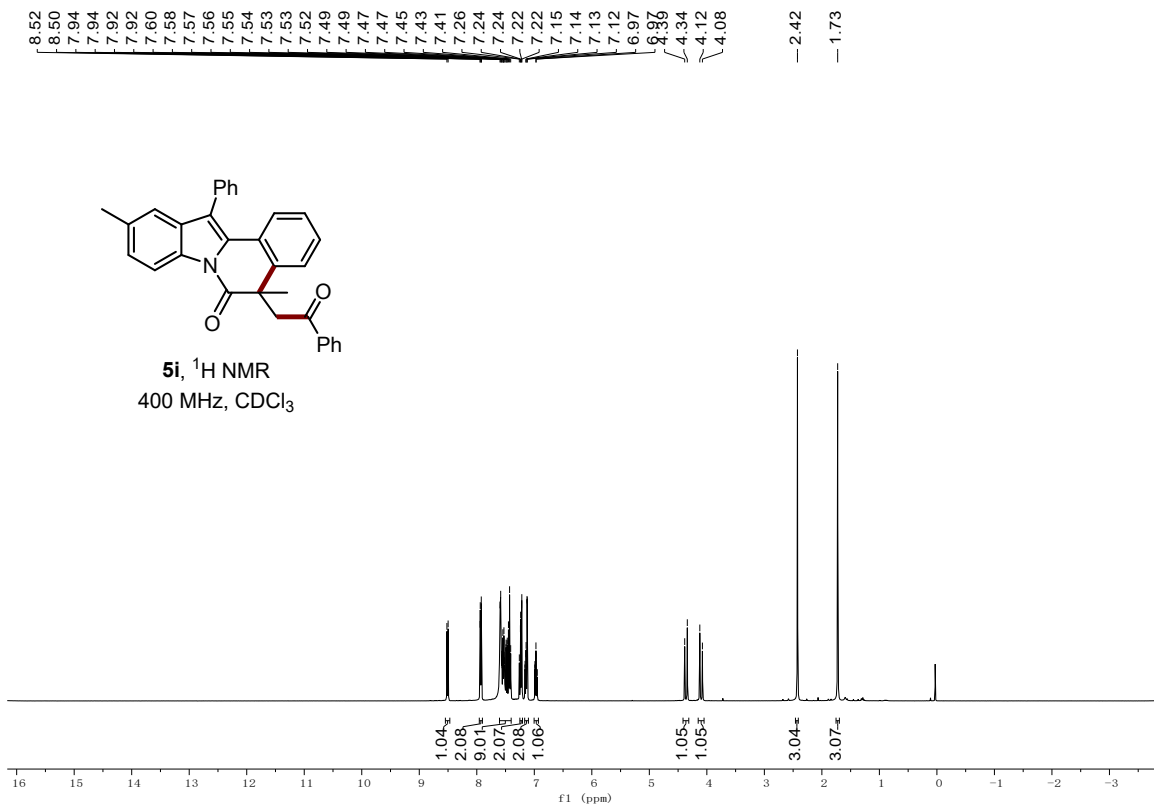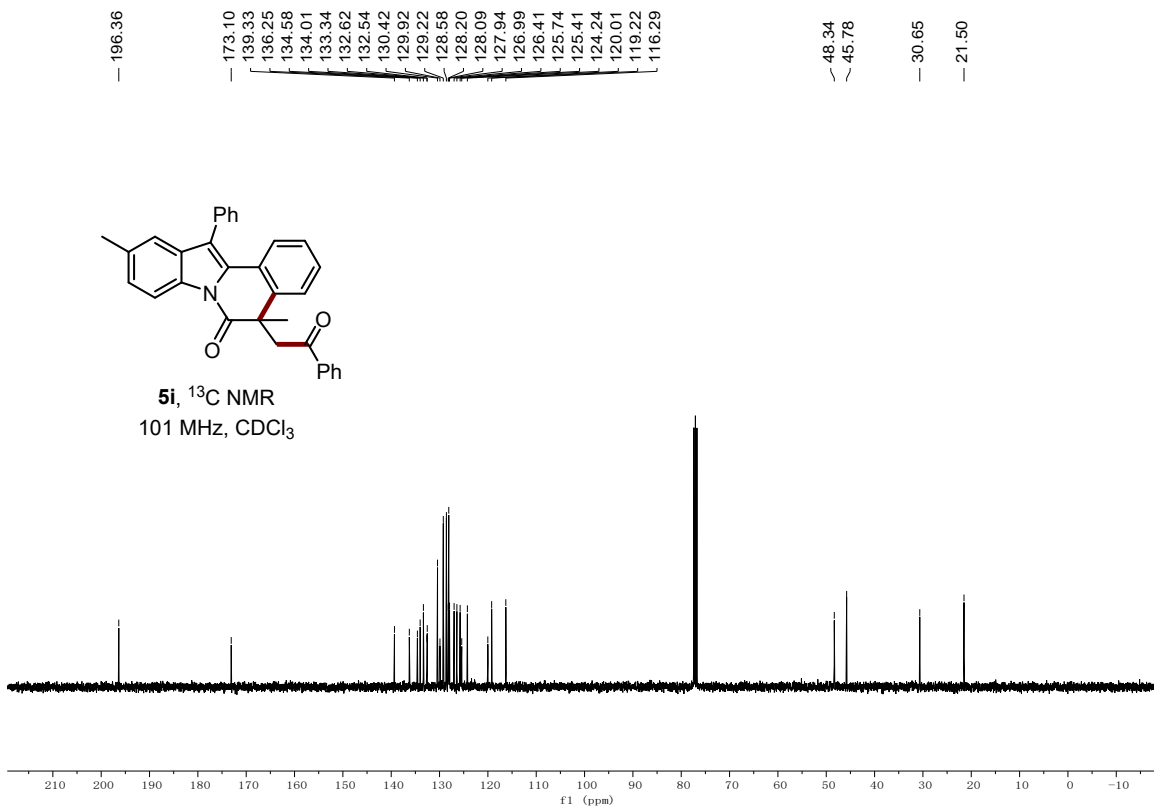



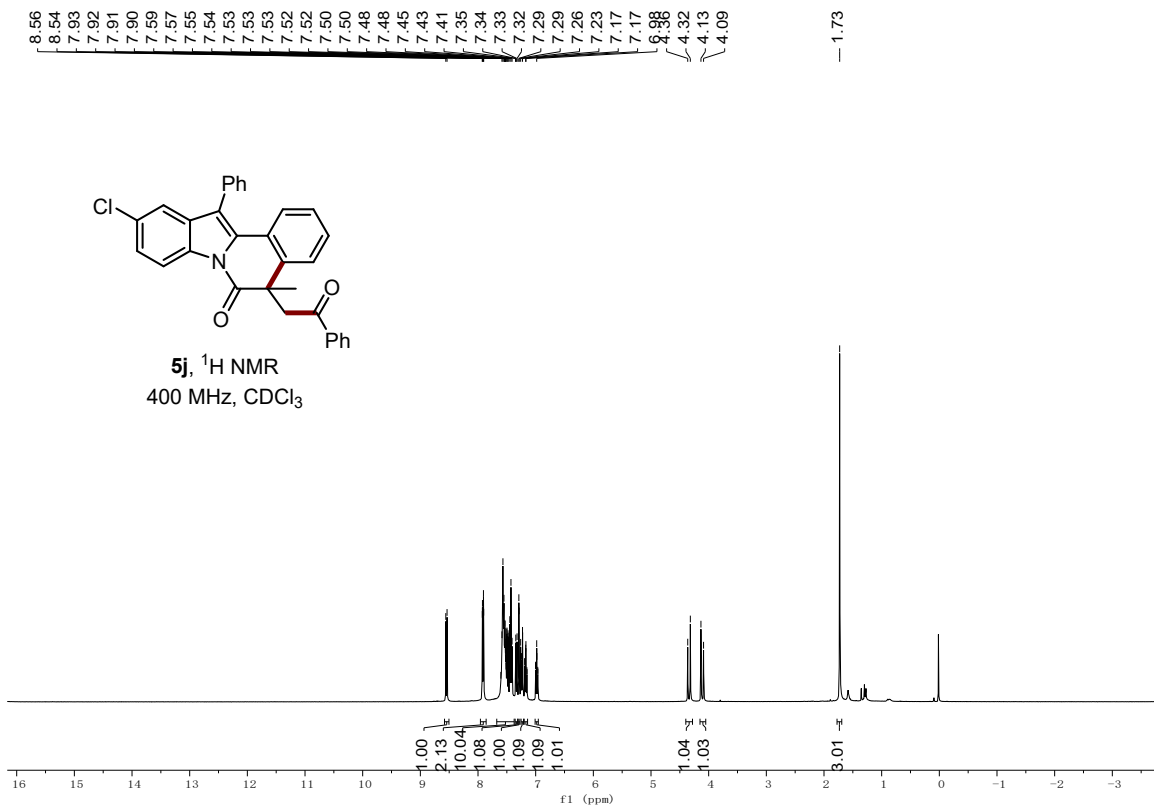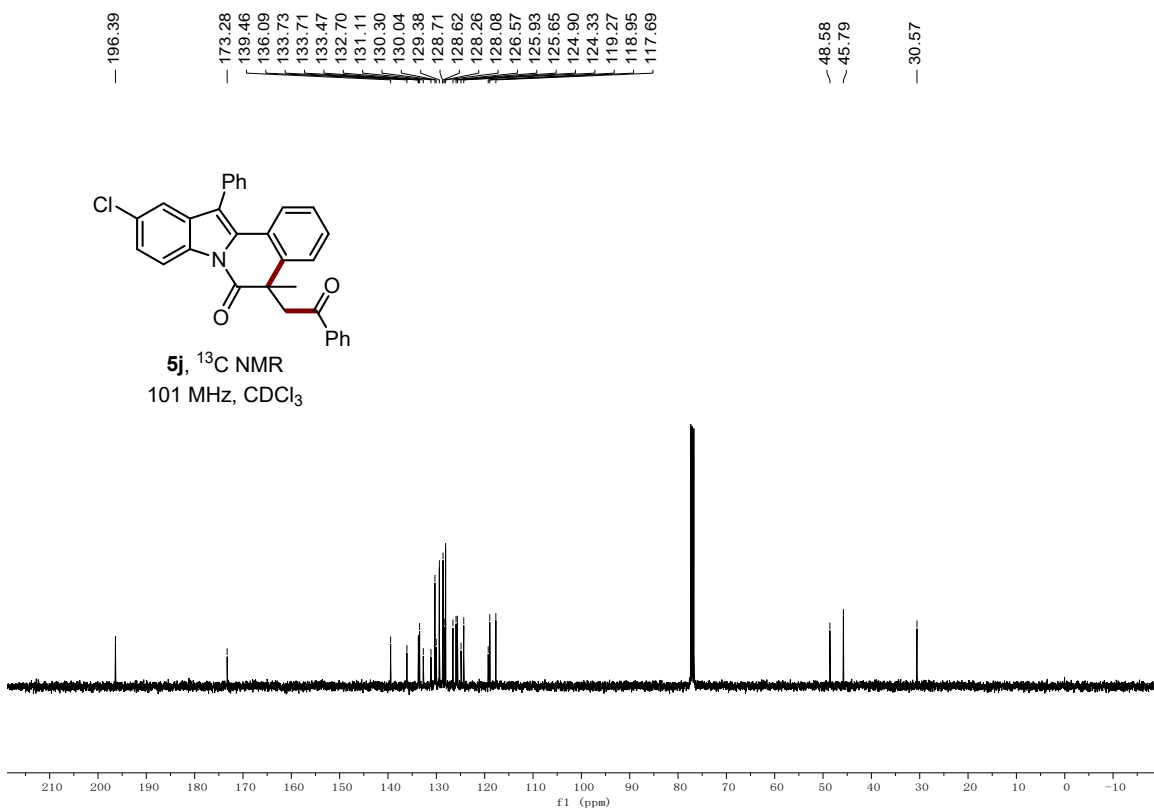

8.72  
8.70  
7.92  
7.92  
7.90  
7.89  
7.65  
7.64  
7.64  
7.63  
7.62  
7.61  
7.61  
7.60  
7.59  
7.58  
7.58  
7.57  
7.56  
7.56  
7.55  
7.54  
7.54  
7.54  
7.53  
7.53  
7.52  
7.51  
7.45  
7.45  
7.43  
7.41  
7.27  
7.27  
7.26  
7.25  
7.25  
7.23  
7.22  
7.21  
7.21  
7.19  
7.19  
7.03  
7.02  
7.01  
7.01  
7.00  
6.99  
6.99  
4.36  
4.32  
4.17  
4.13  
1.74

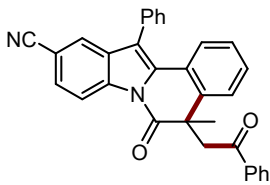

**5k, <sup>1</sup>H NMR**  
400 MHz, CDCl<sub>3</sub>

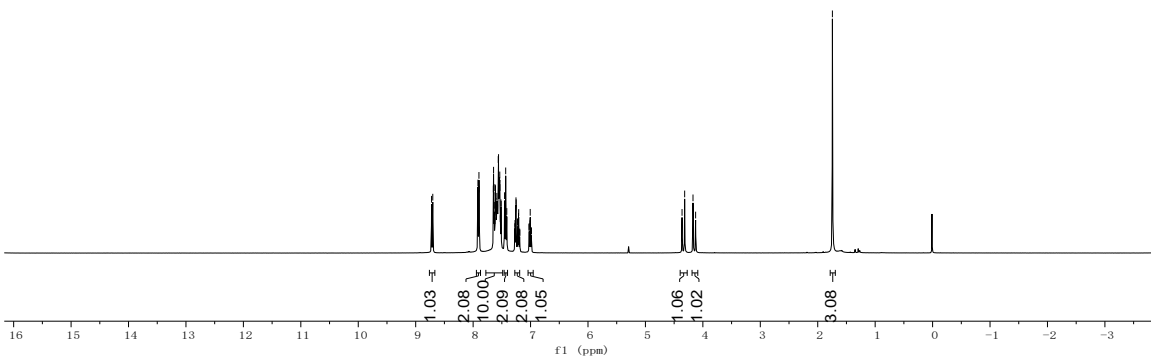

196.42  
173.67  
139.42  
136.16  
135.93  
133.61  
133.06  
132.54  
132.02  
130.21  
129.54  
129.22  
128.67  
128.59  
128.09  
126.75  
126.12  
124.45  
124.08  
119.65  
119.21  
117.41  
107.66

48.84  
45.95  
30.49

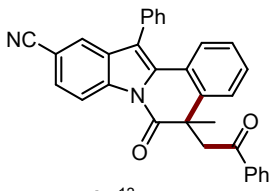

**5k, <sup>13</sup>C NMR**  
101 MHz, CDCl<sub>3</sub>

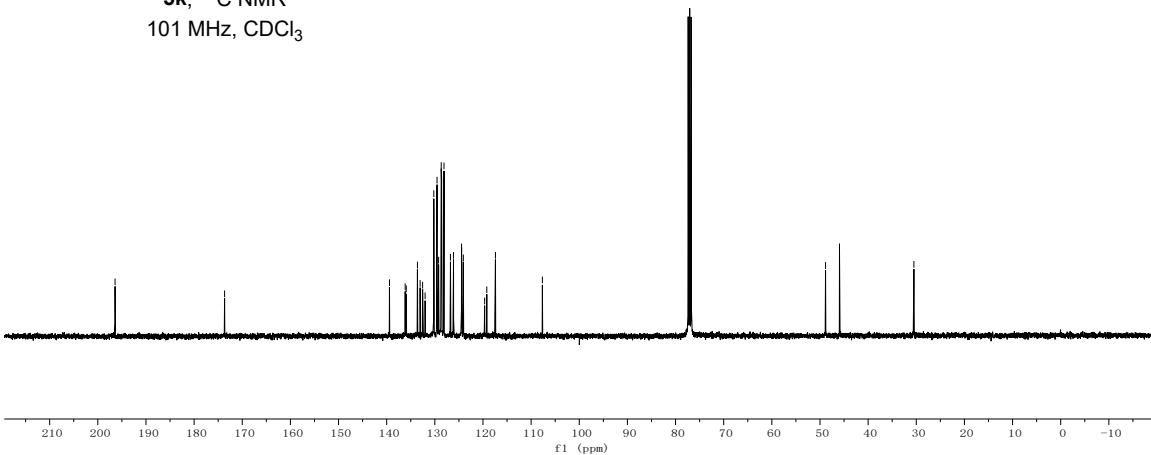

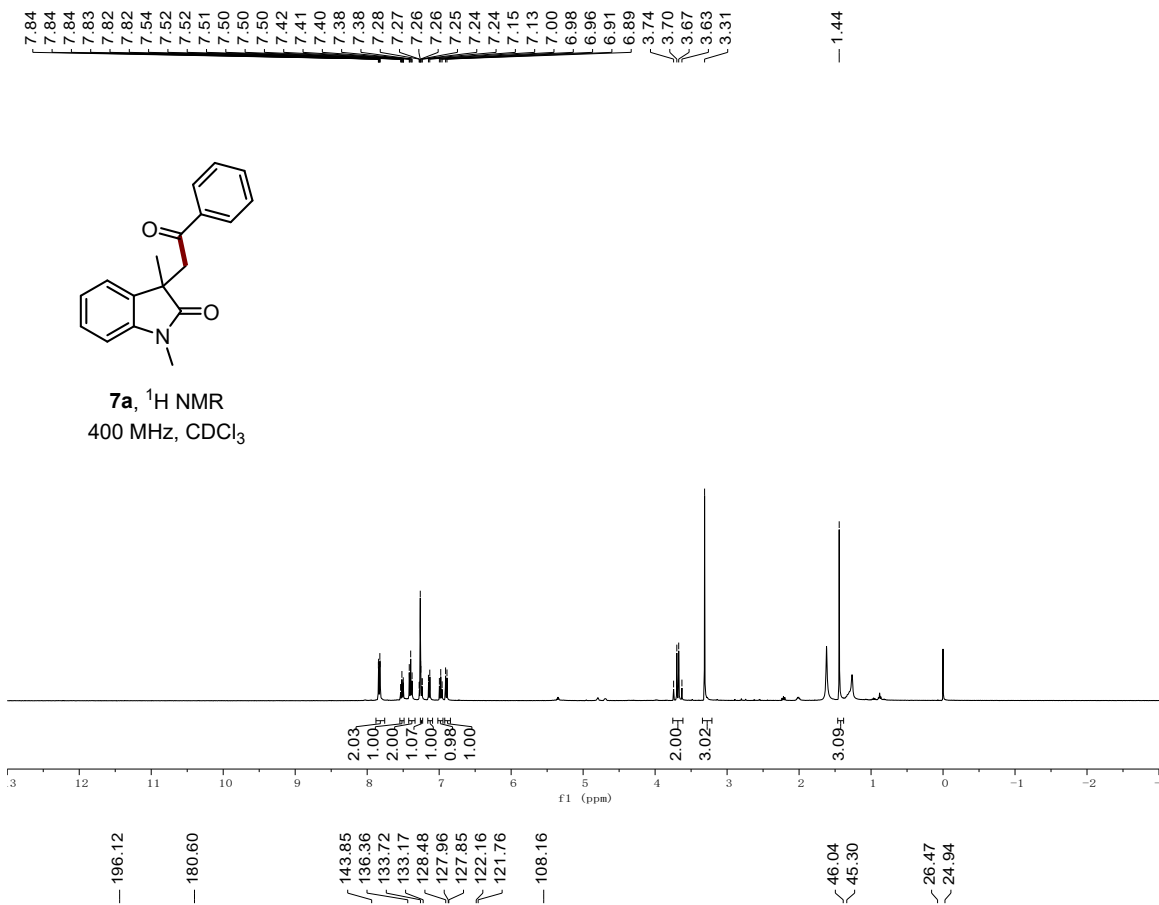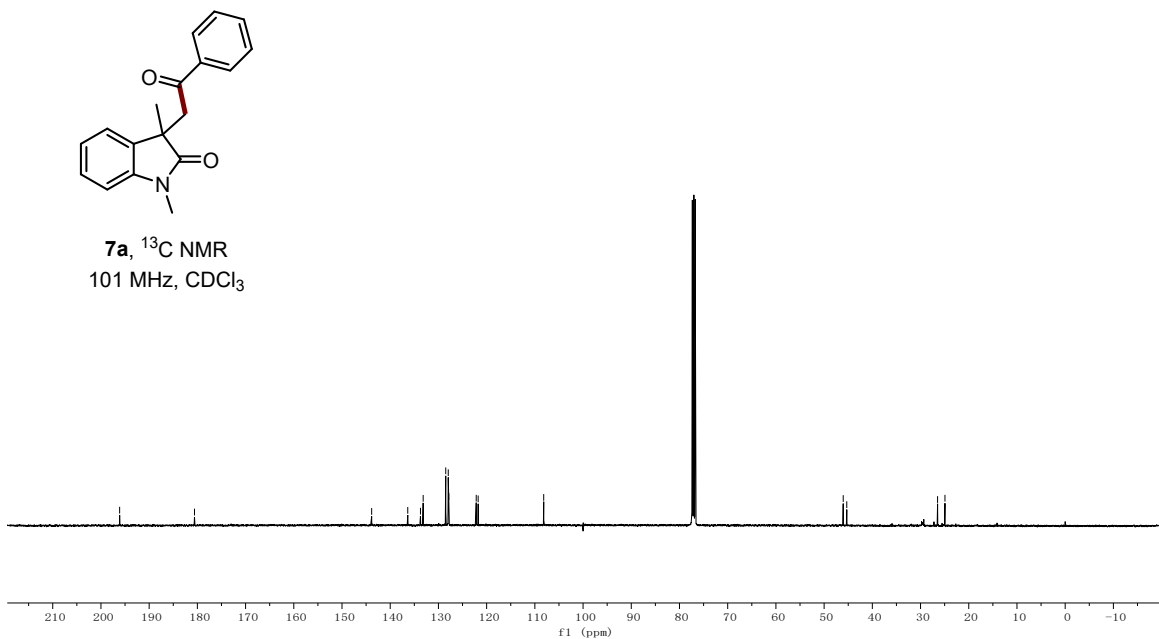

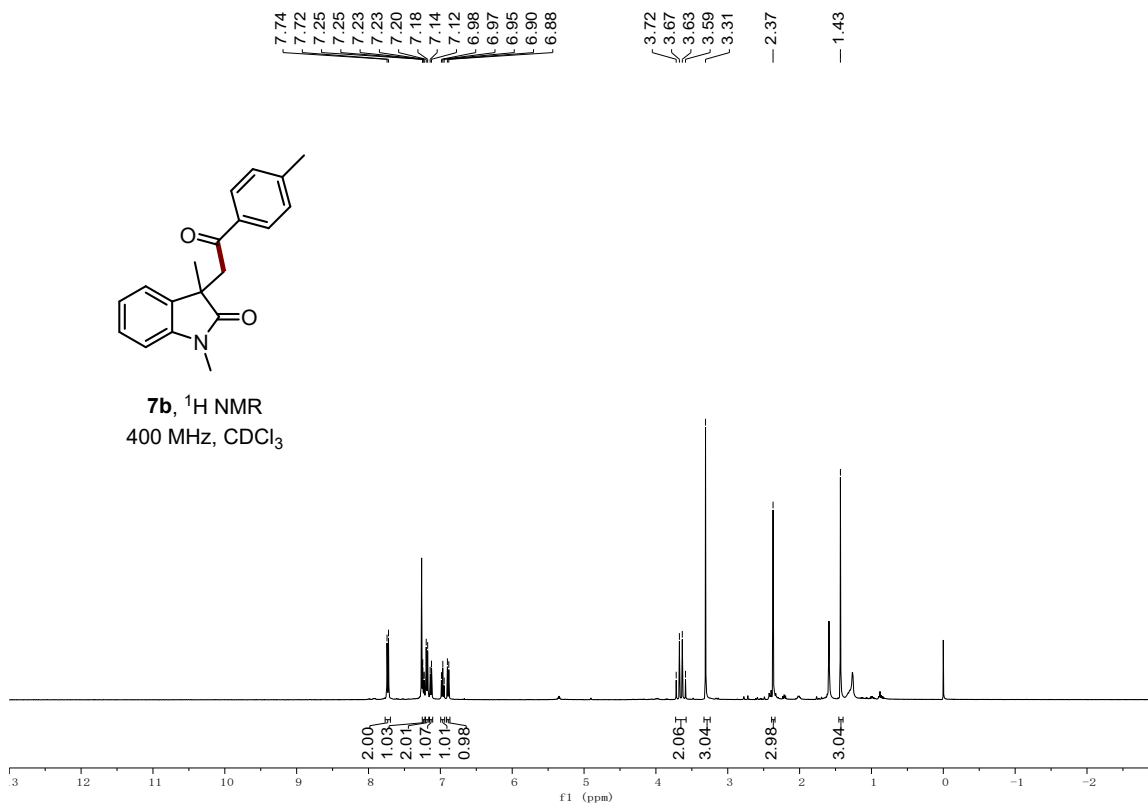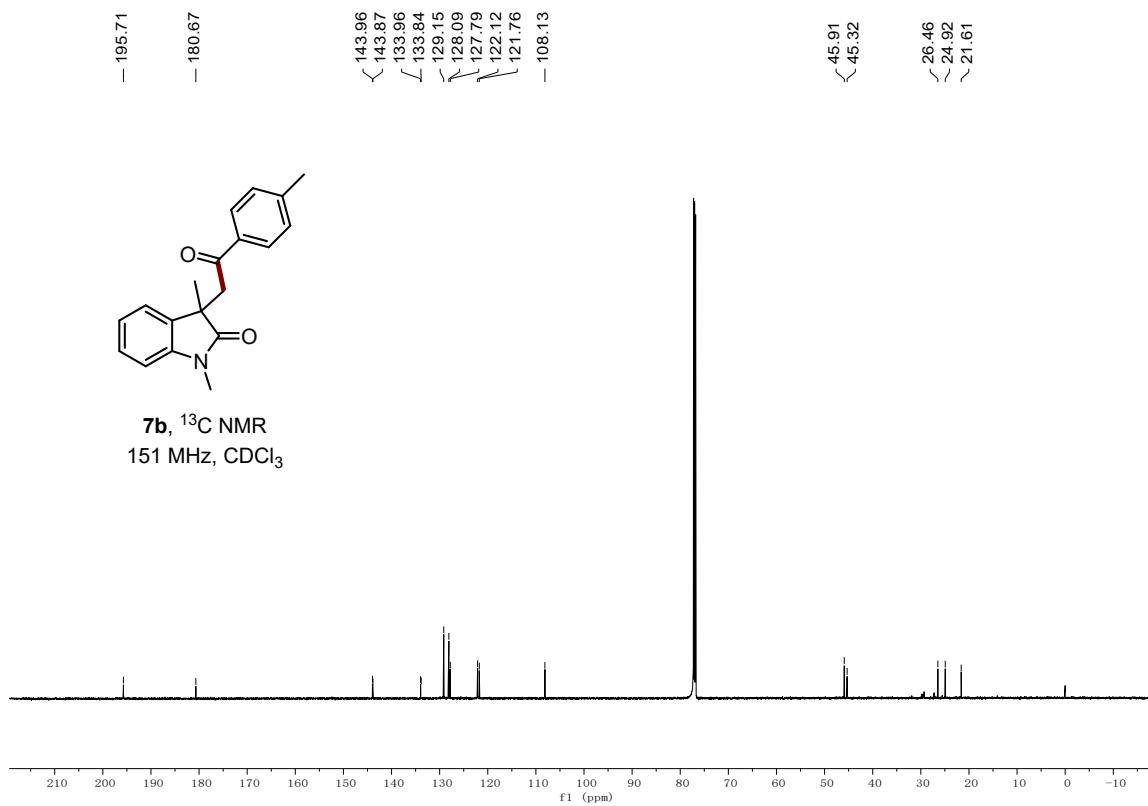

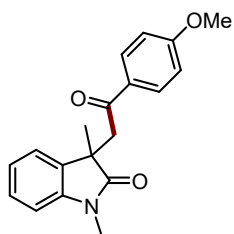

**7c**,  $^1\text{H}$  NMR  
400 MHz,  $\text{CDCl}_3$

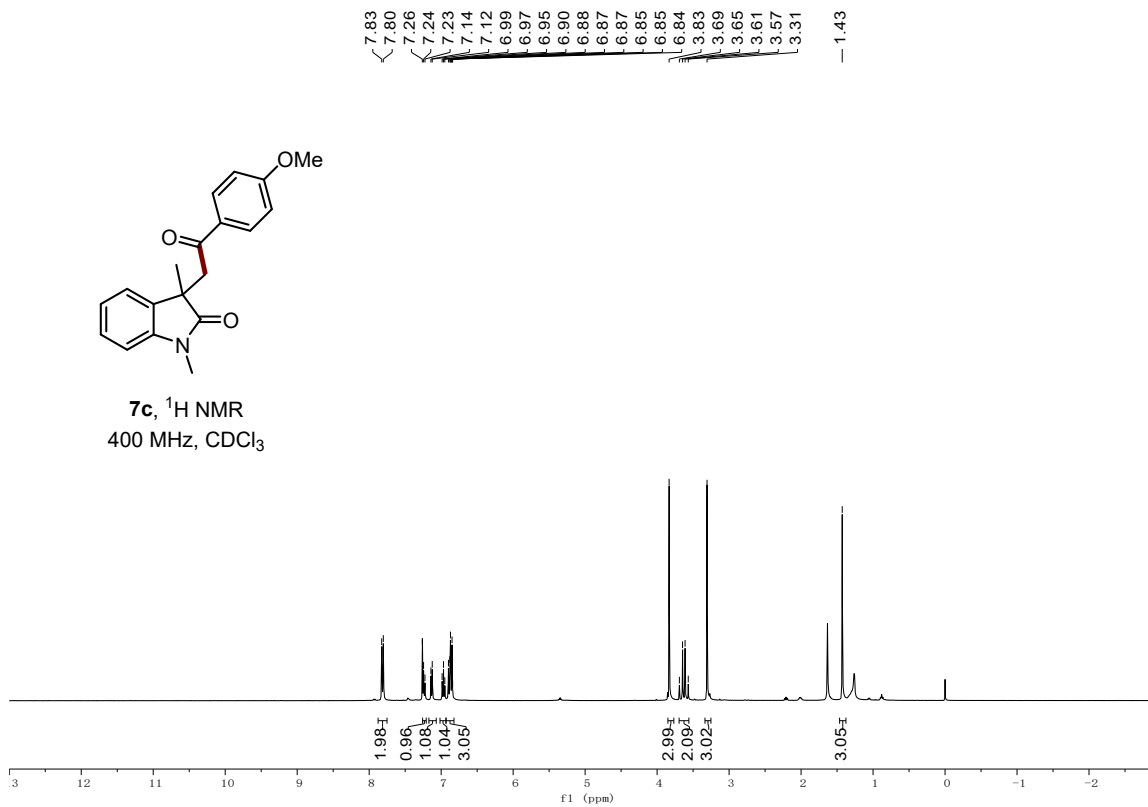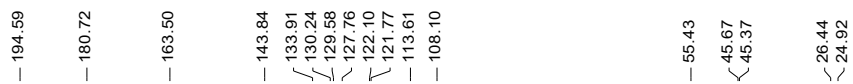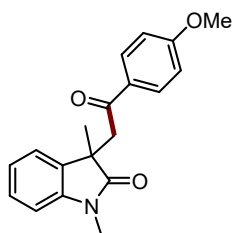

**7c**,  $^{13}\text{C}$  NMR  
101 MHz,  $\text{CDCl}_3$

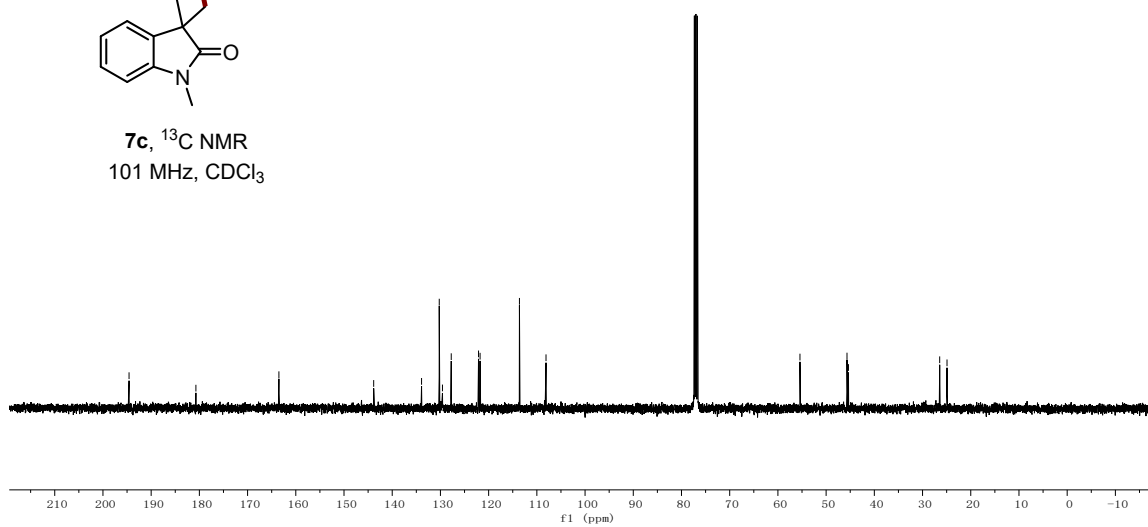

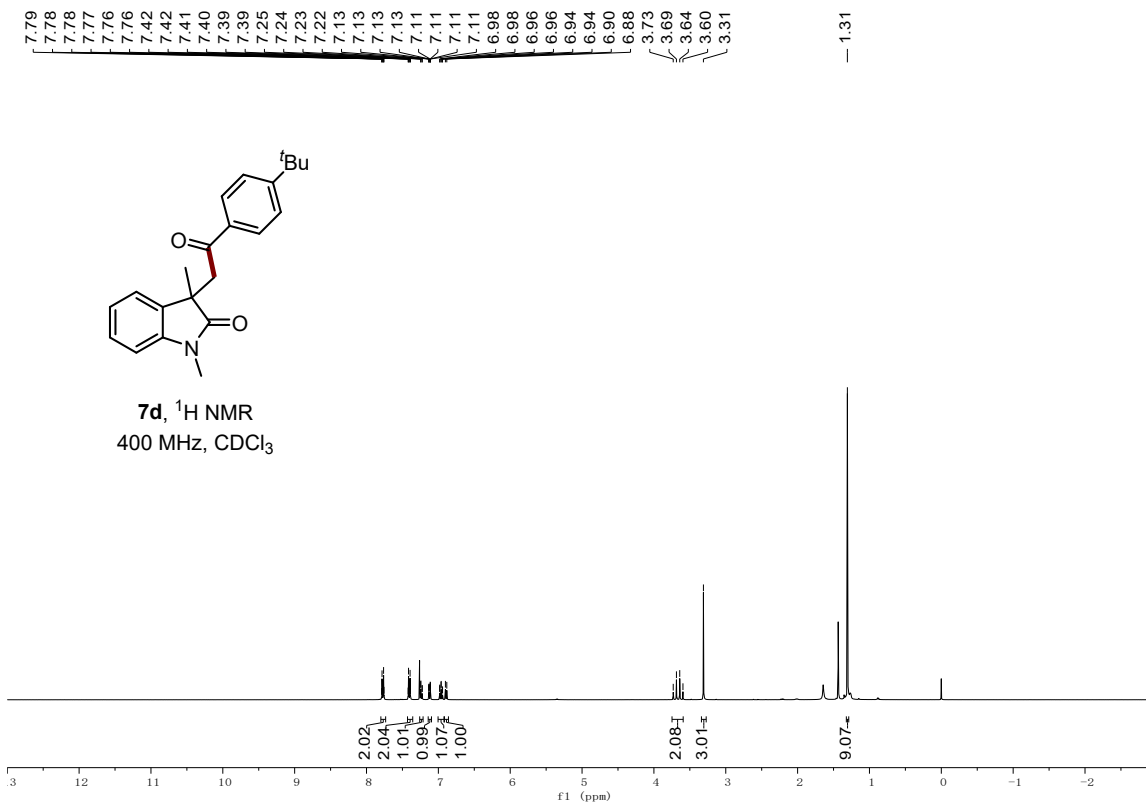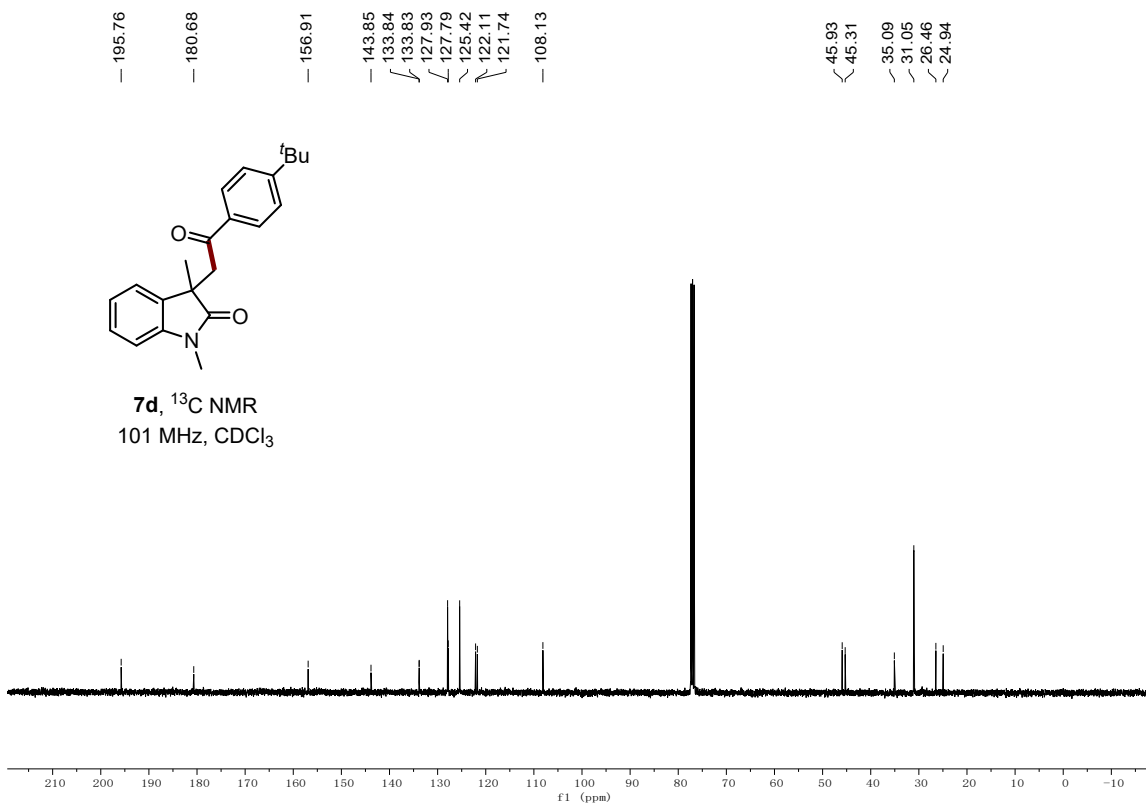

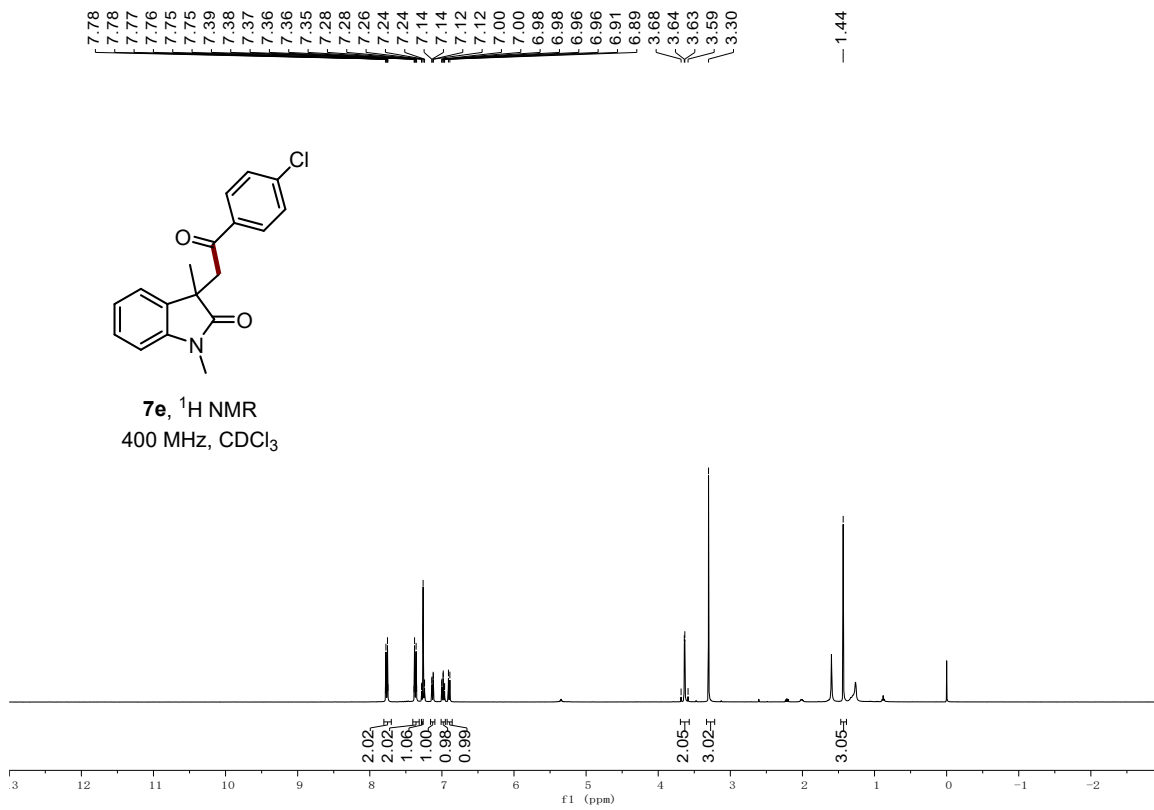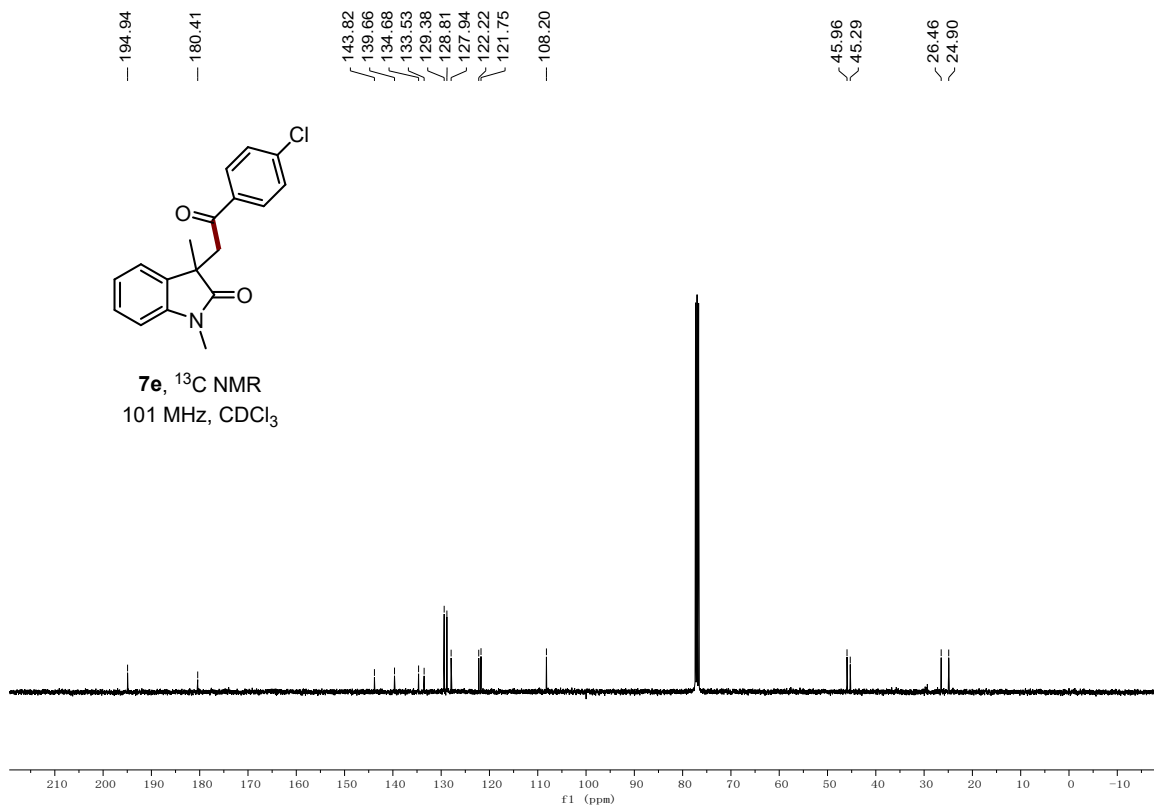

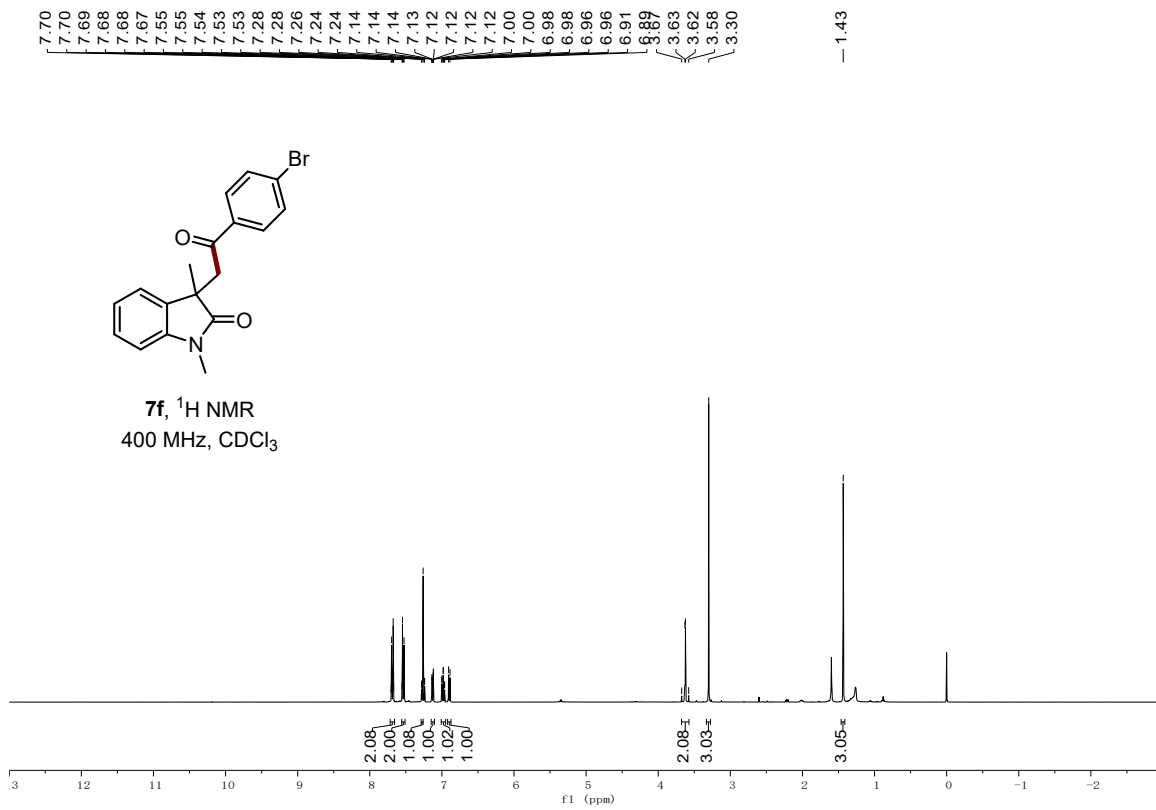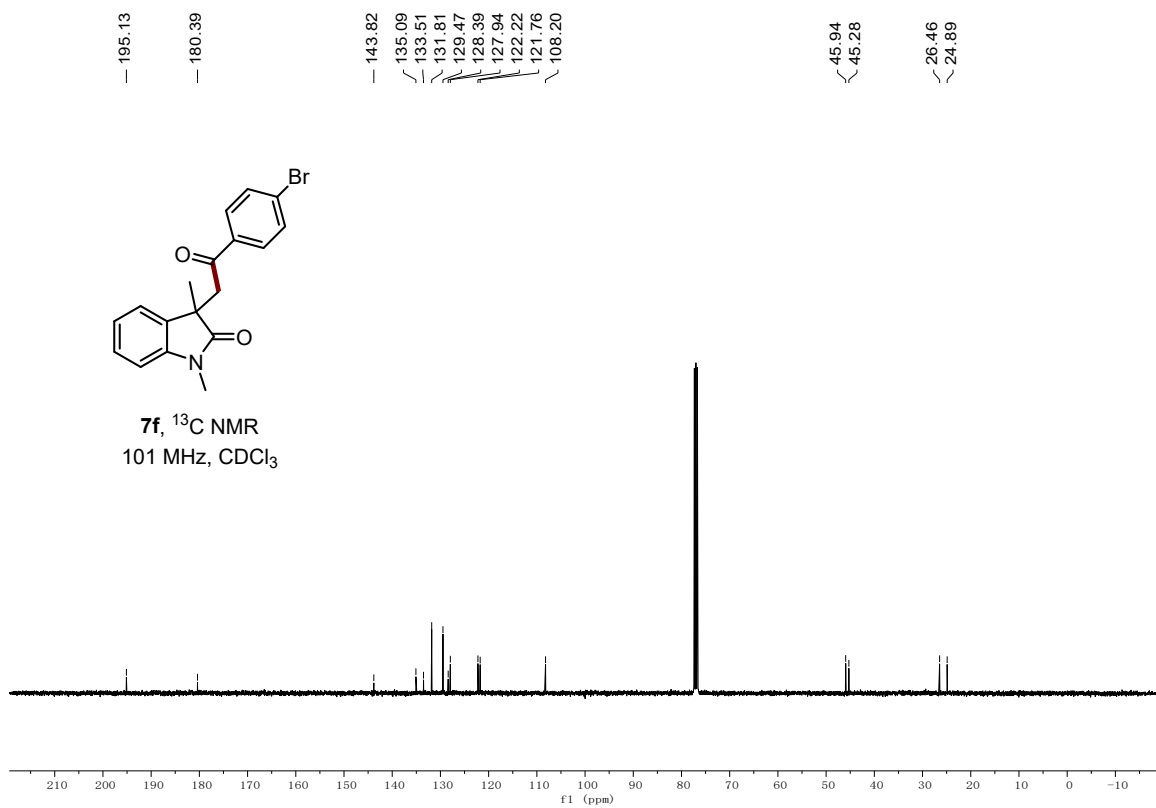



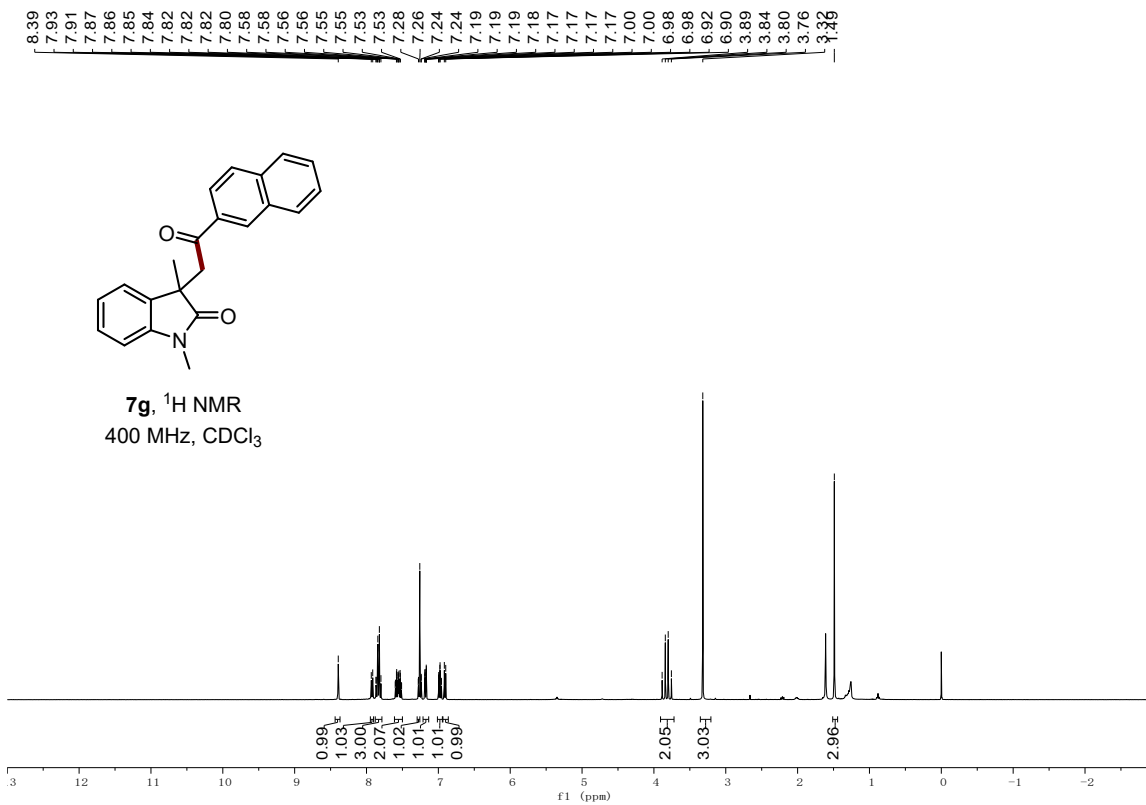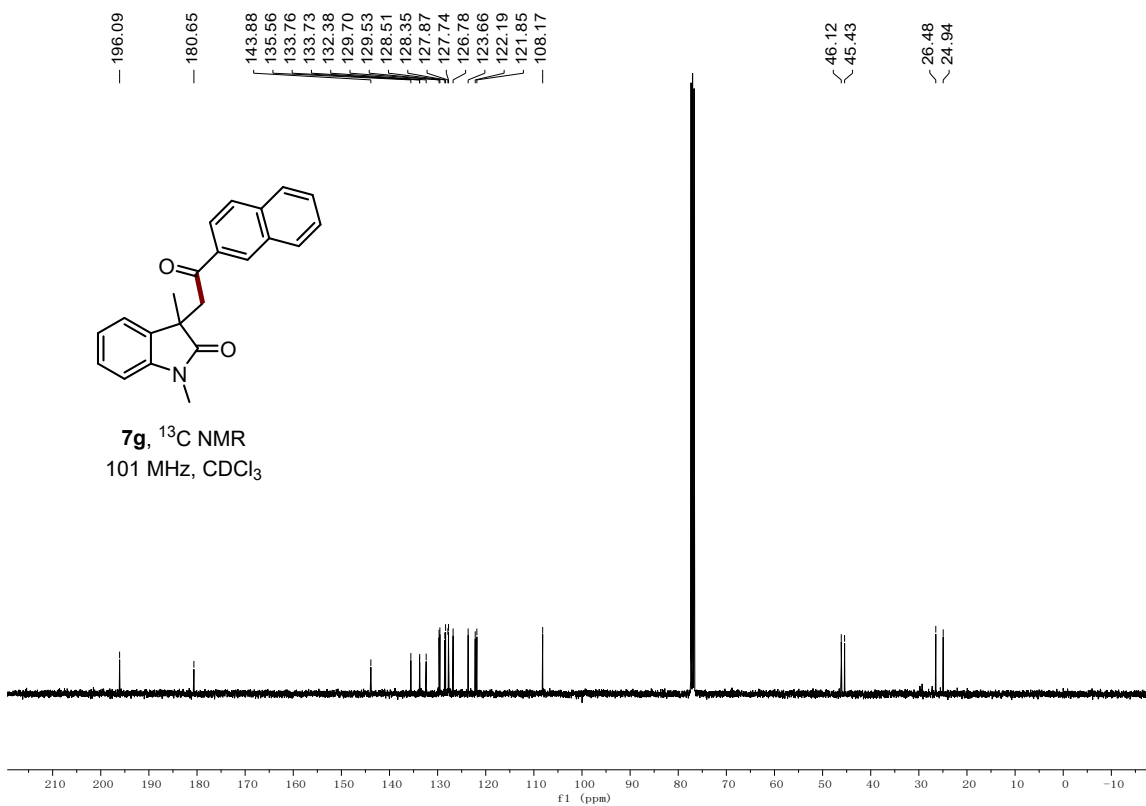

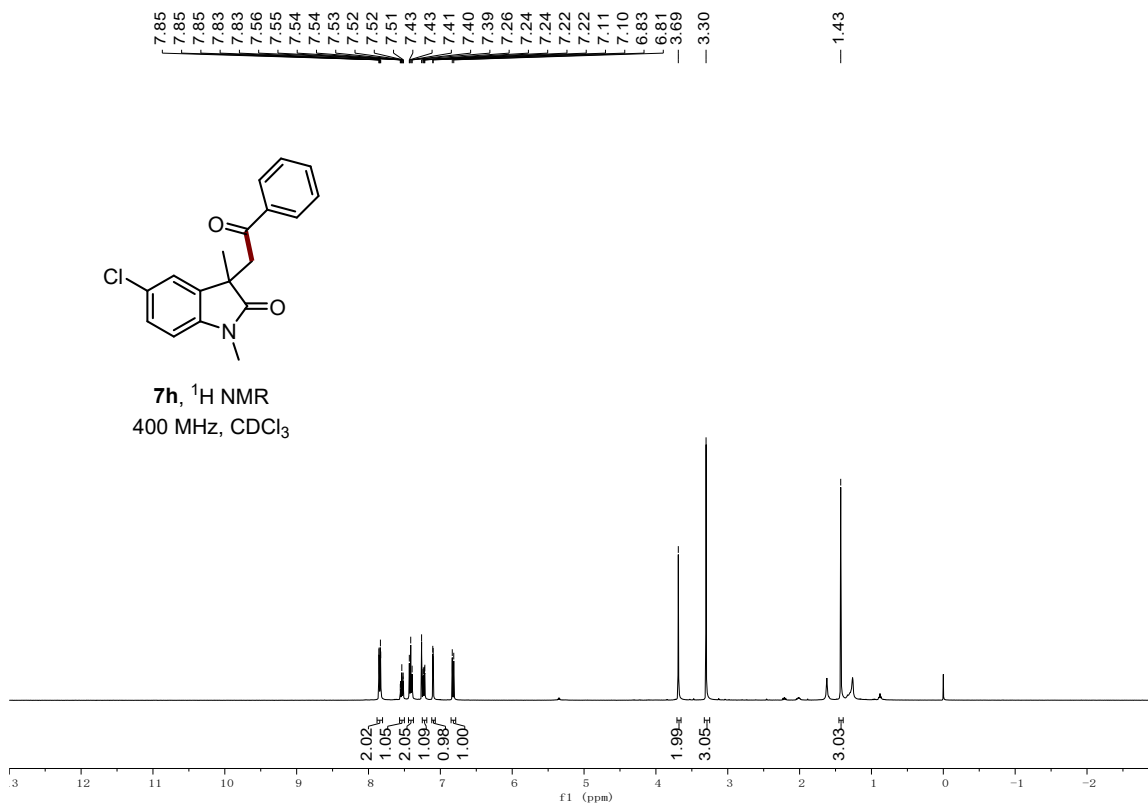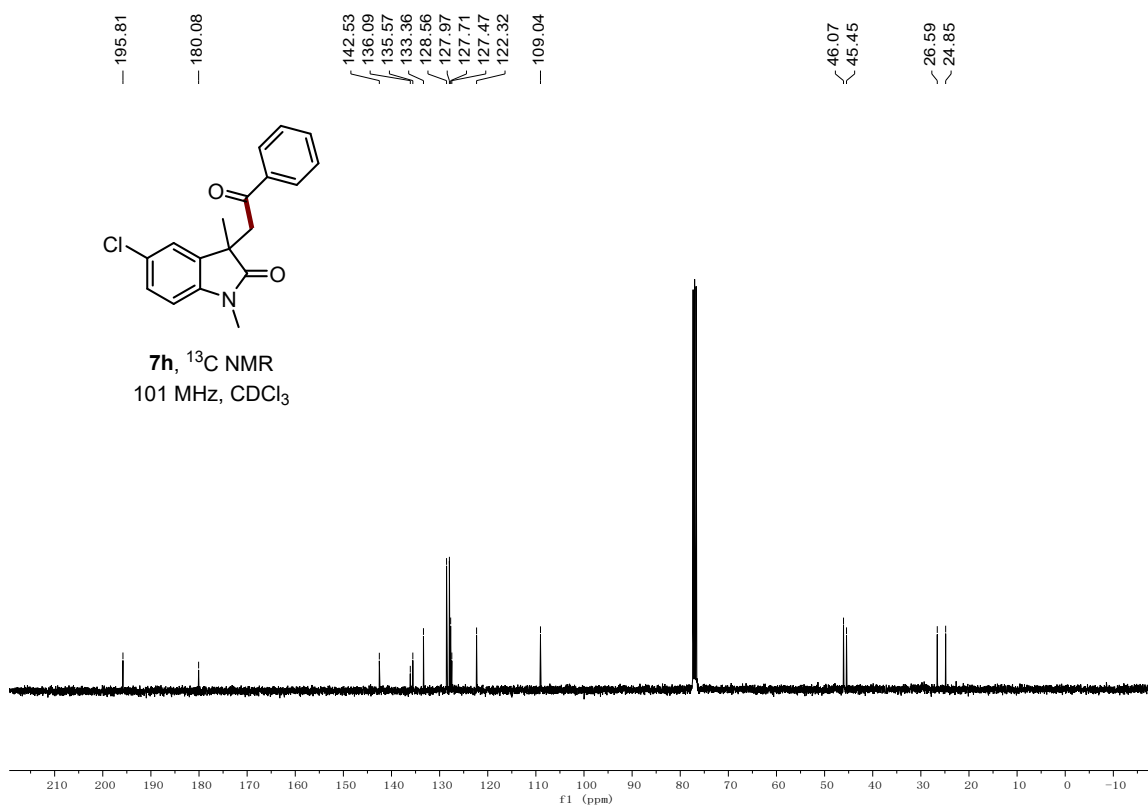

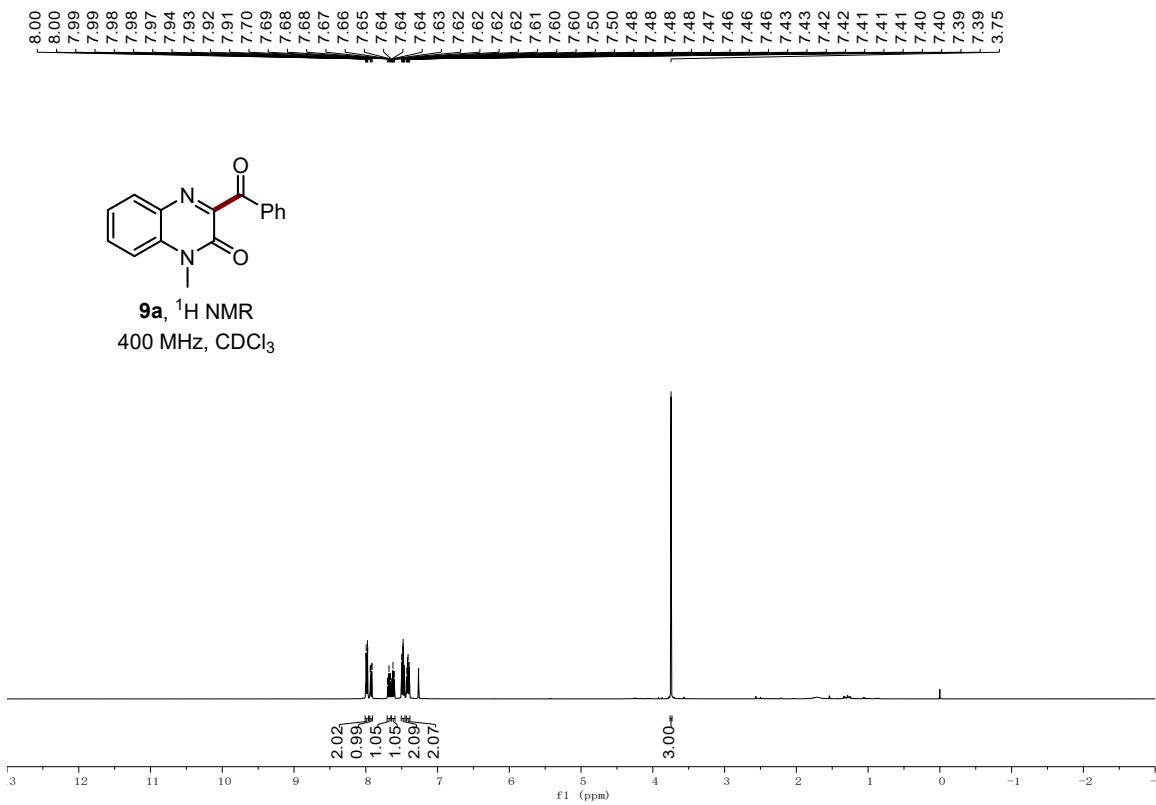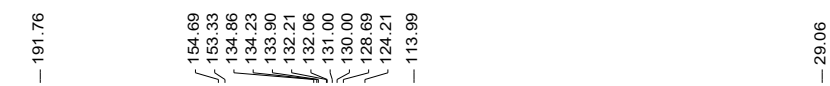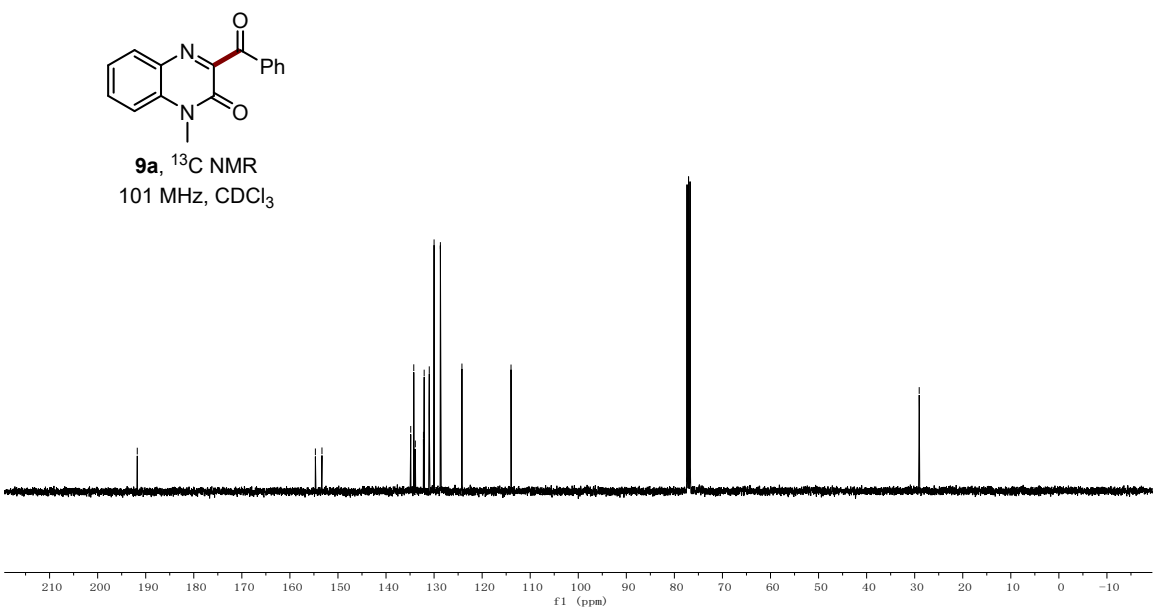

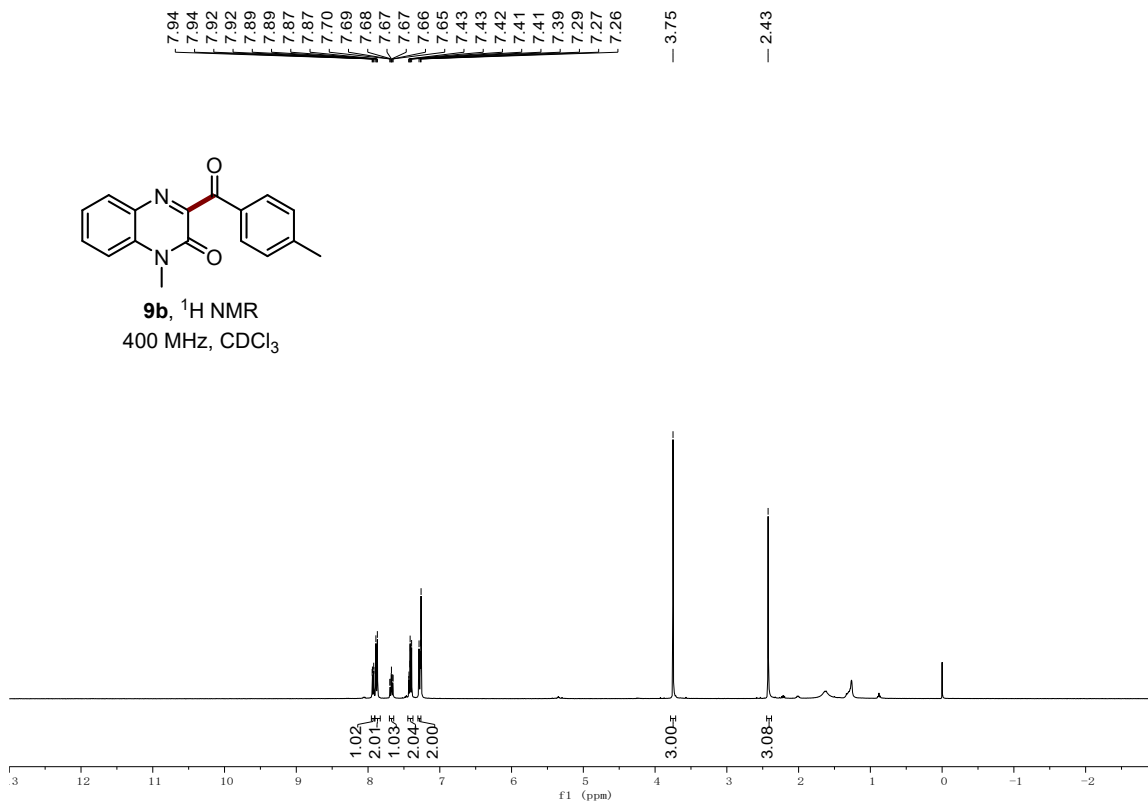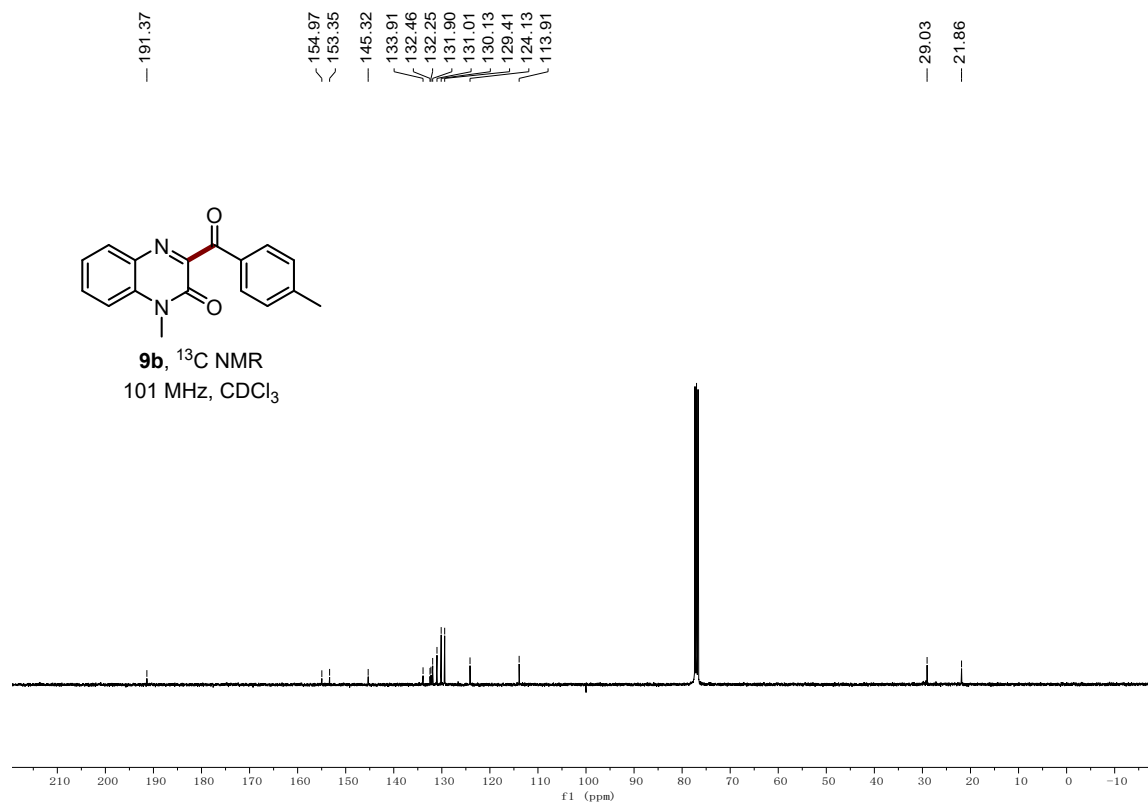

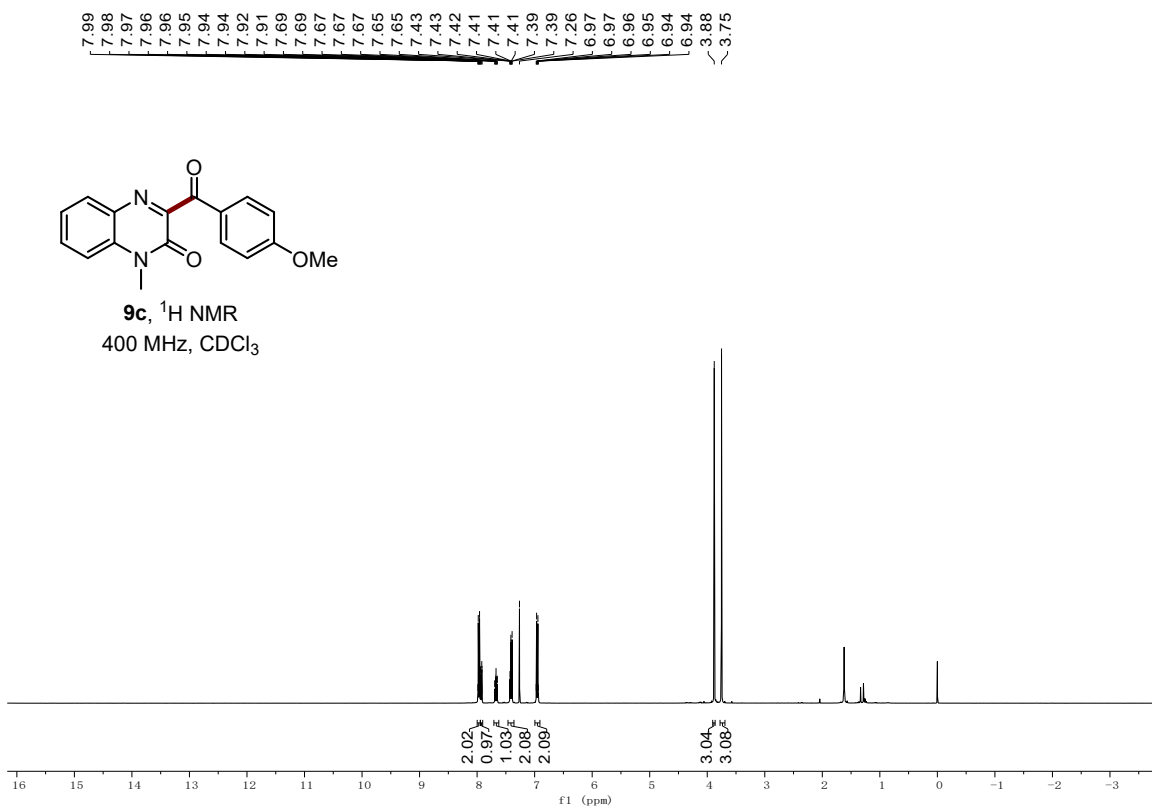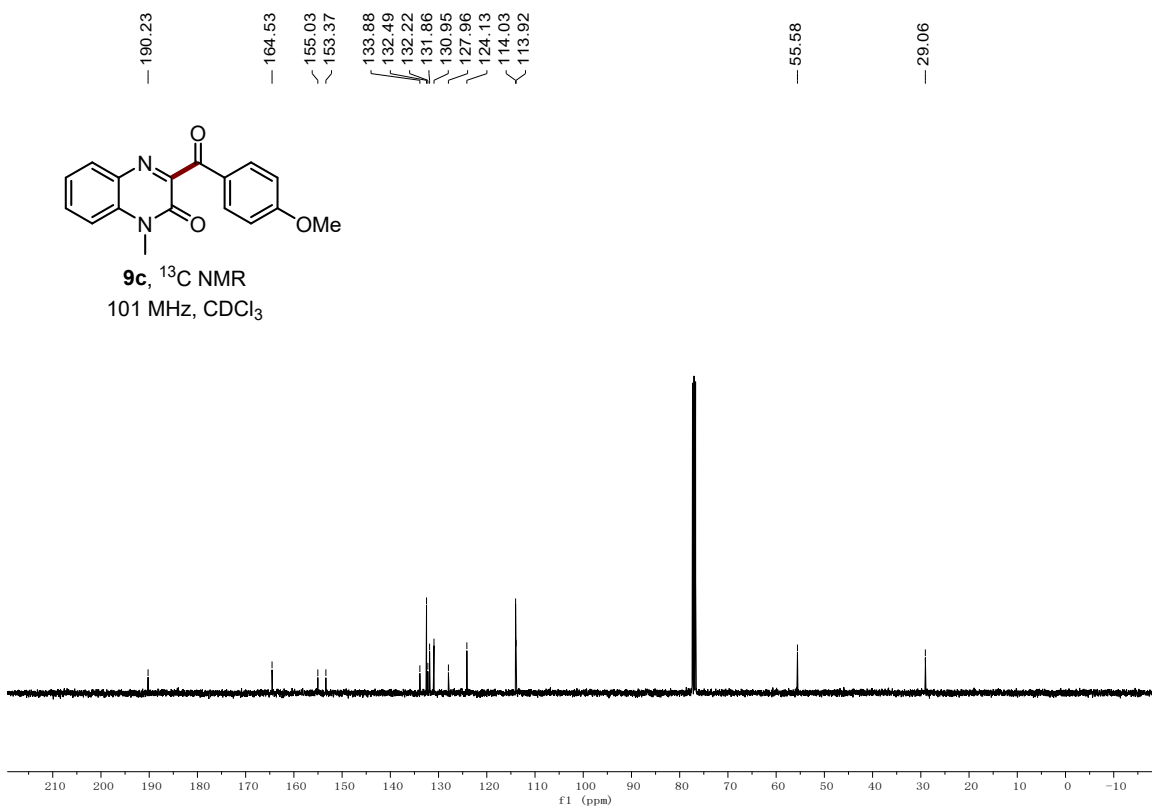

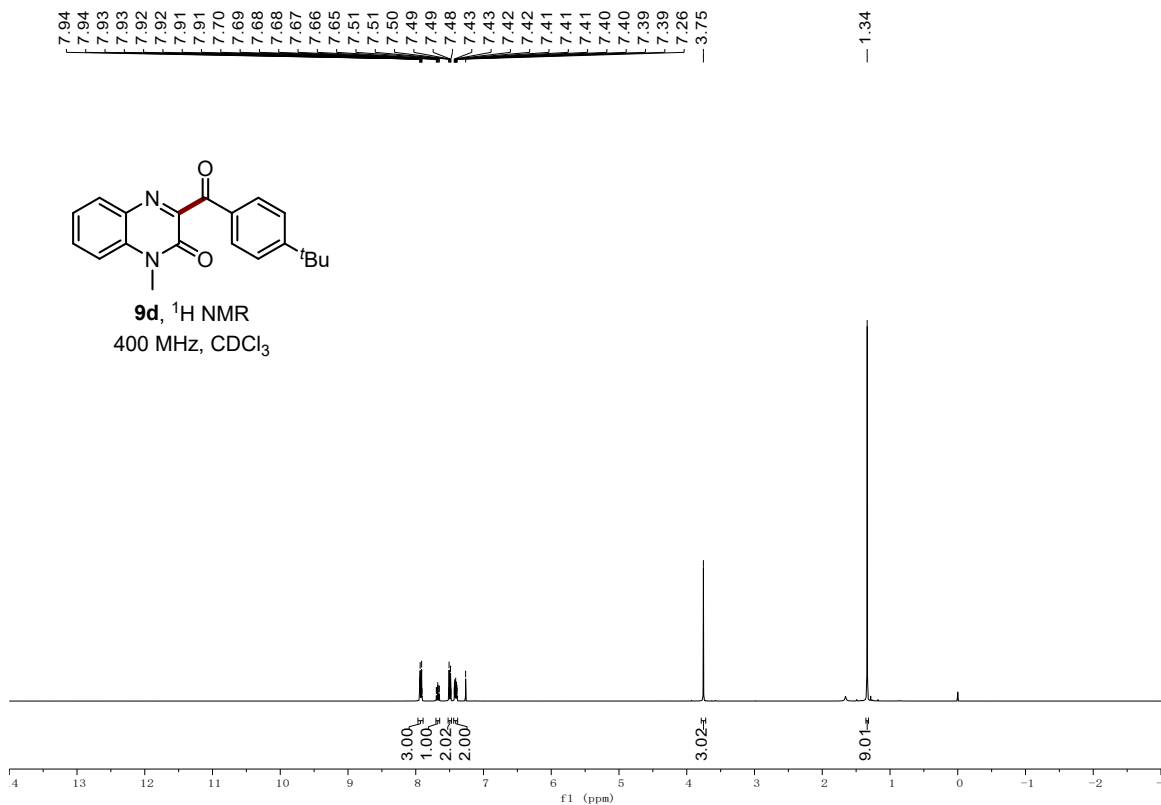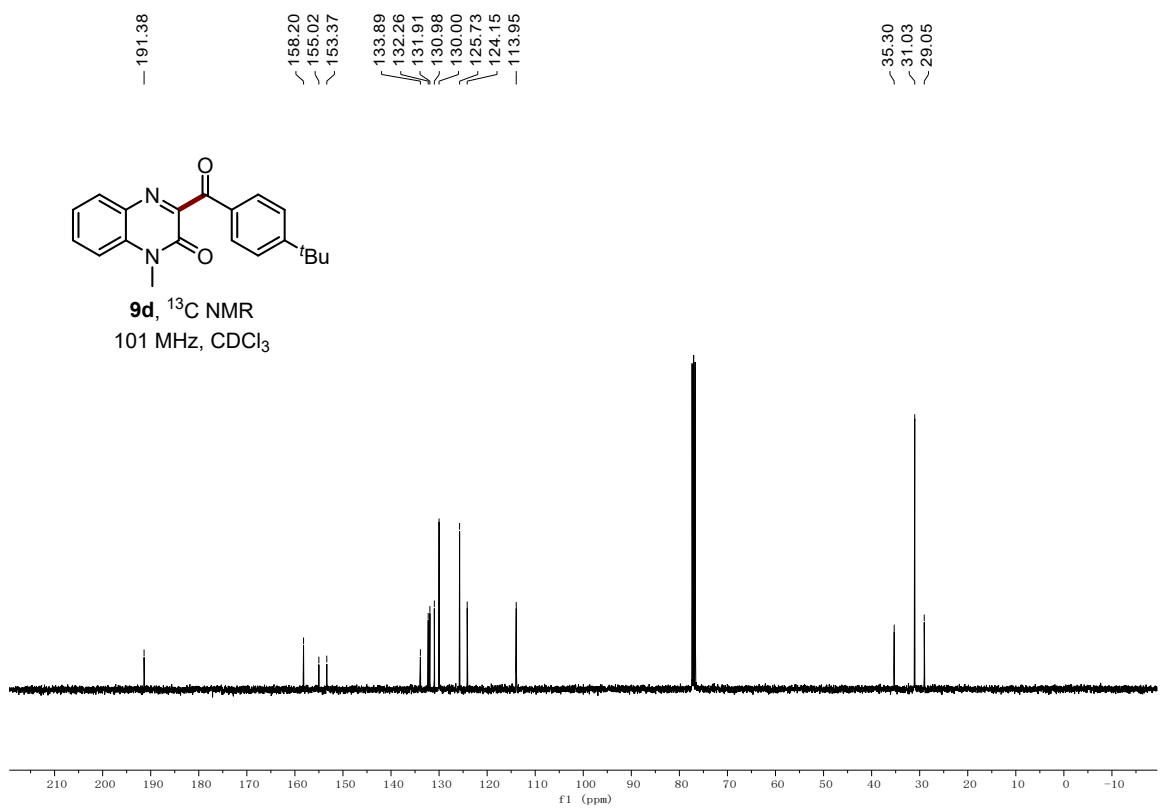

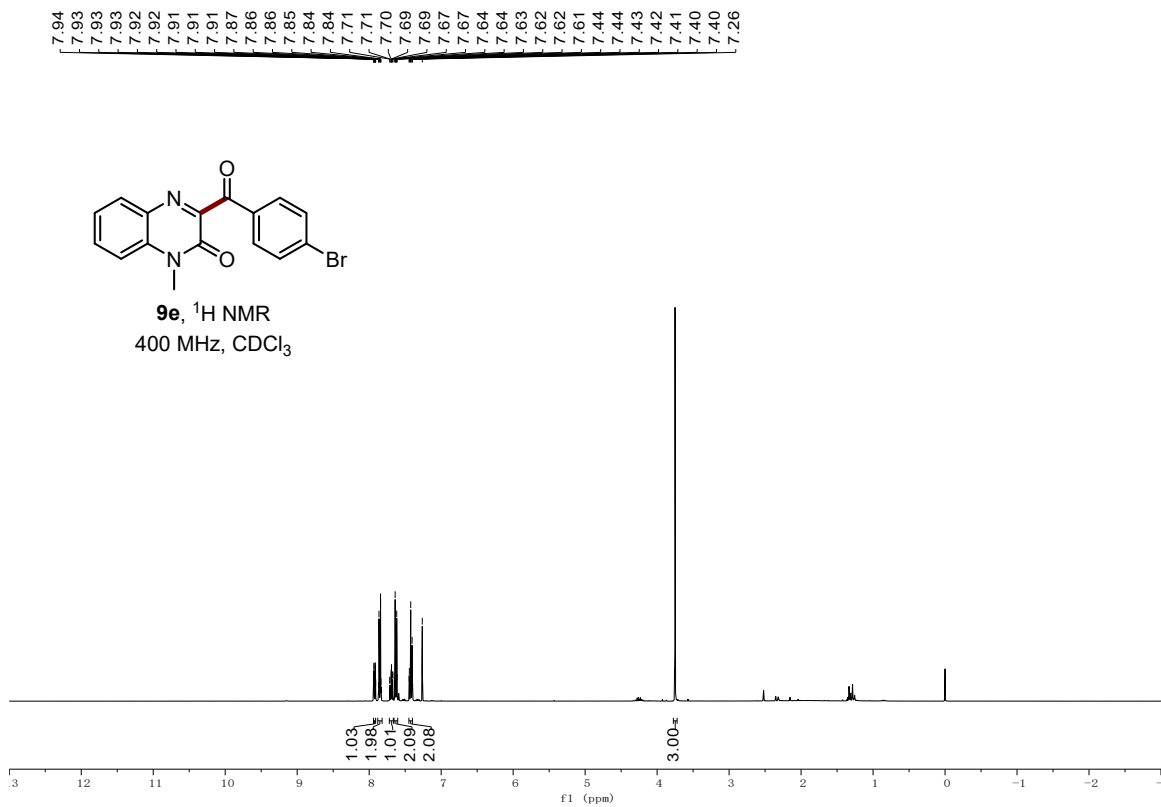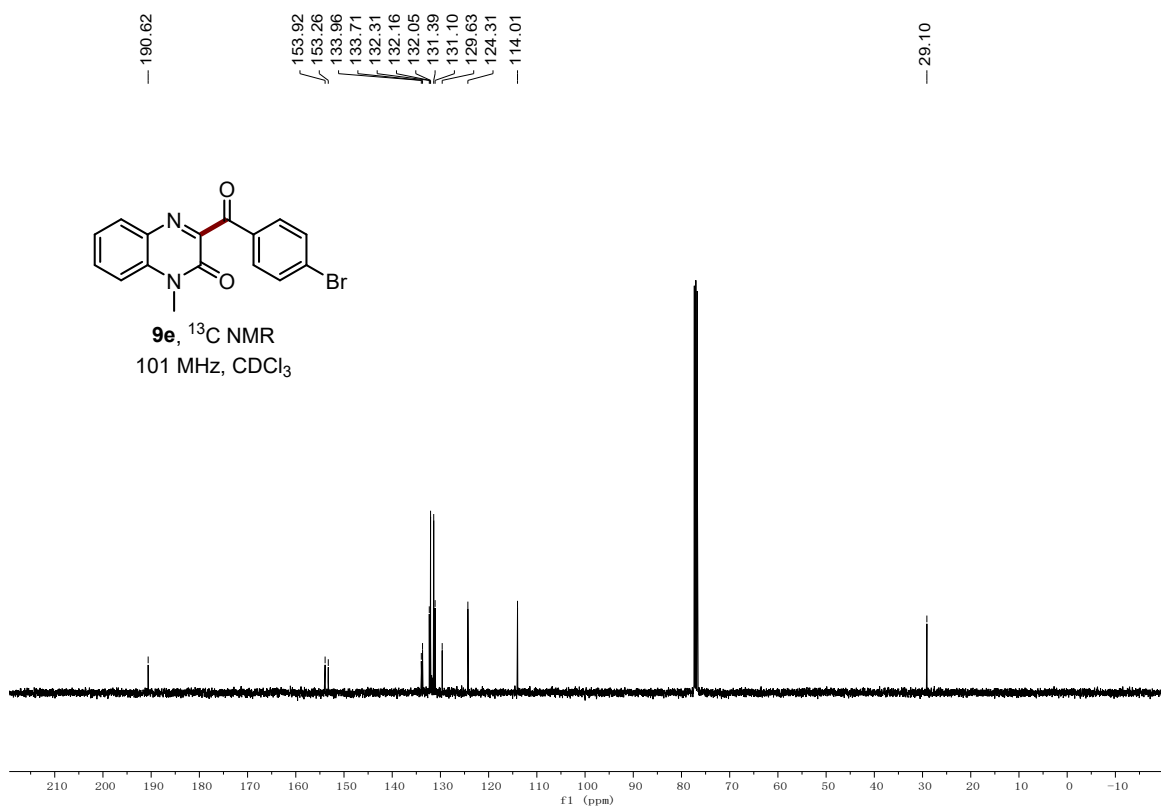

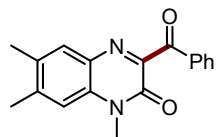

**9f**,  $^1\text{H}$  NMR  
400 MHz,  $\text{CDCl}_3$

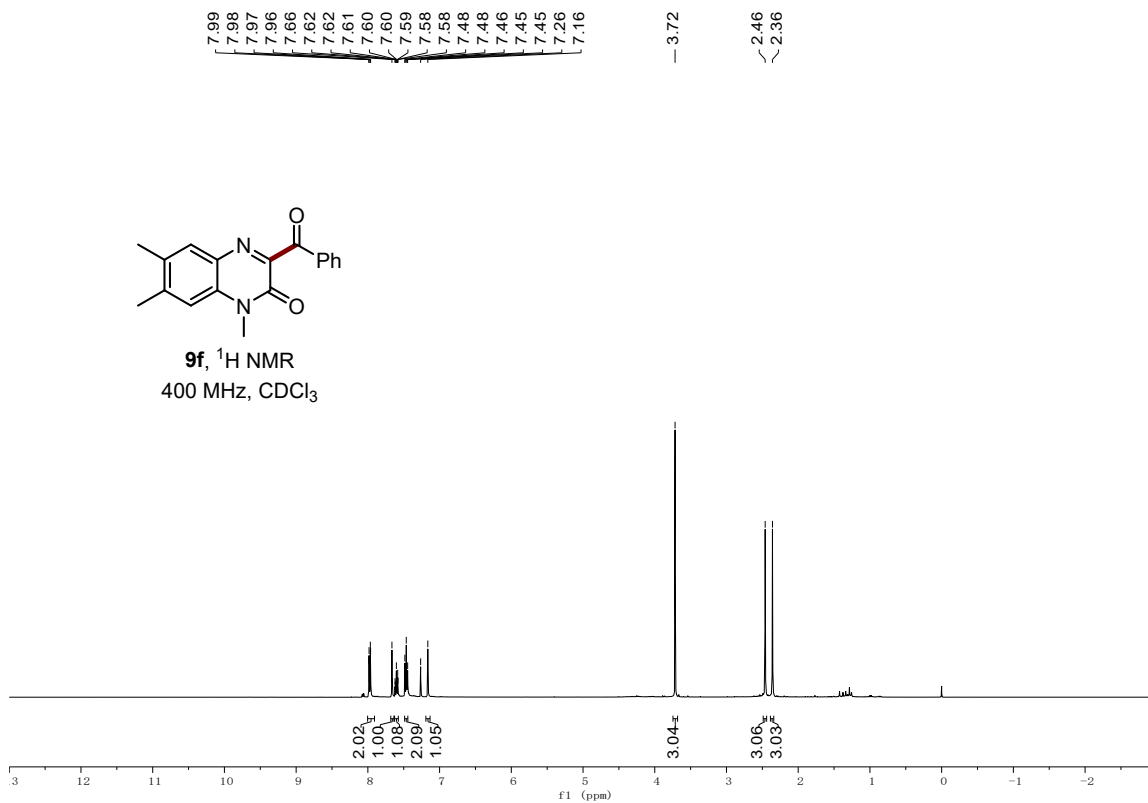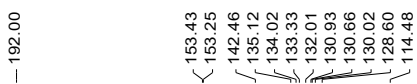

**9f**,  $^{13}\text{C}$  NMR  
101 MHz,  $\text{CDCl}_3$

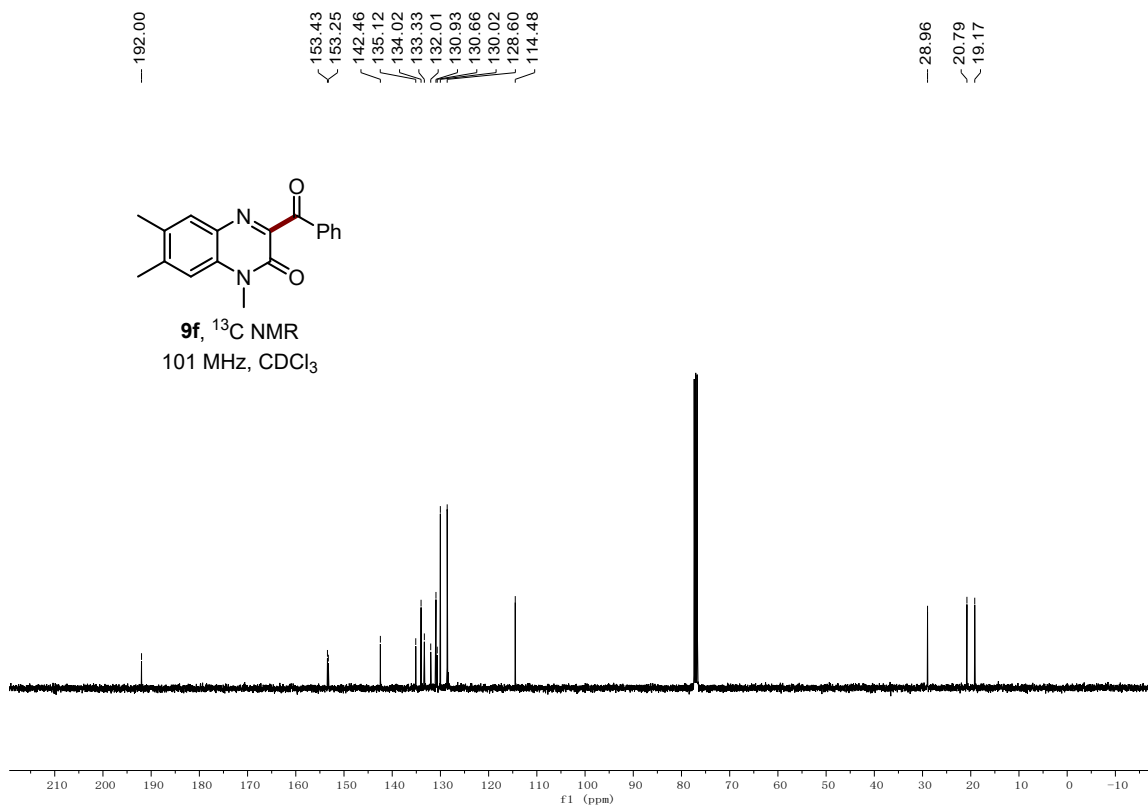



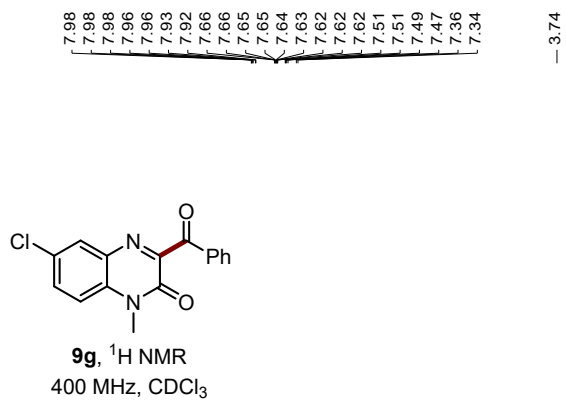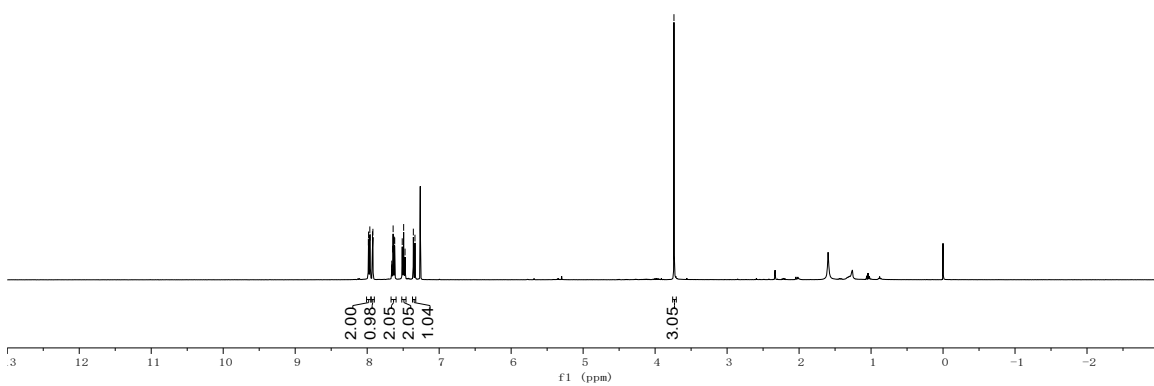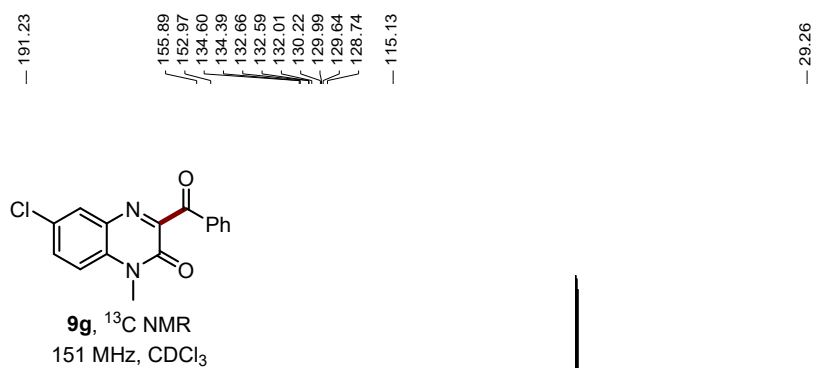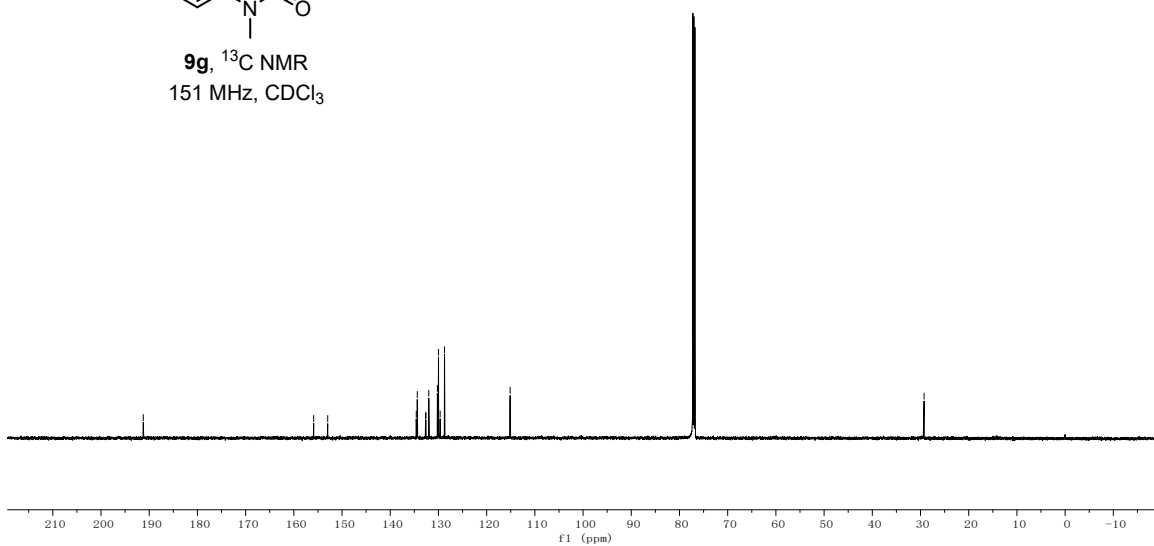

8.00  
7.99  
7.98  
7.98  
7.98  
7.95  
7.93  
7.93  
7.89  
7.89  
7.67  
7.67  
7.65  
7.65  
7.64  
7.62  
7.60  
7.60  
7.50  
7.50  
7.48  
7.48  
7.47  
7.46  
7.44  
7.44  
7.42  
7.42  
7.40  
7.40  
7.38  
7.38  
7.26  
4.40  
4.38  
4.36  
4.34  
4.34  
1.43  
1.41

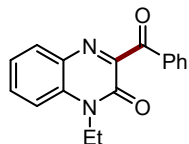

**9h**,  $^1\text{H NMR}$   
400 MHz,  $\text{CDCl}_3$

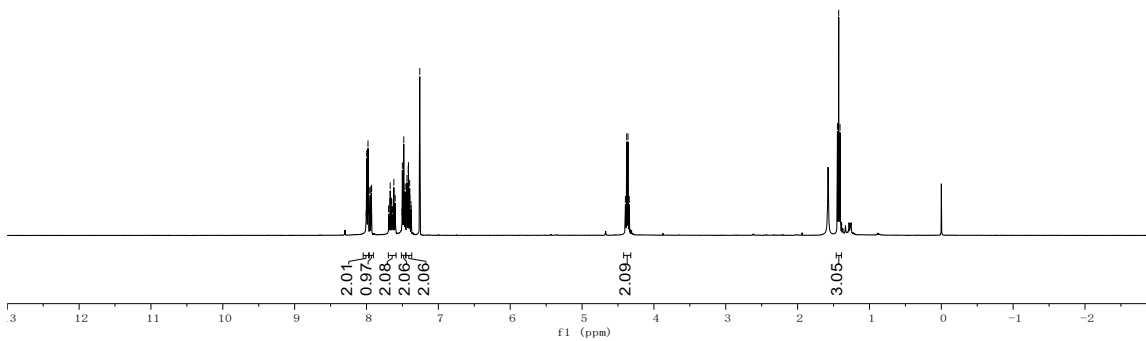

191.84  
154.73  
152.84  
134.94  
134.17  
132.92  
132.53  
131.96  
131.30  
130.00  
128.66  
123.96  
113.78  
37.41  
12.46

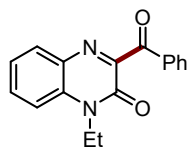

**9h**,  $^{13}\text{C NMR}$   
101 MHz,  $\text{CDCl}_3$

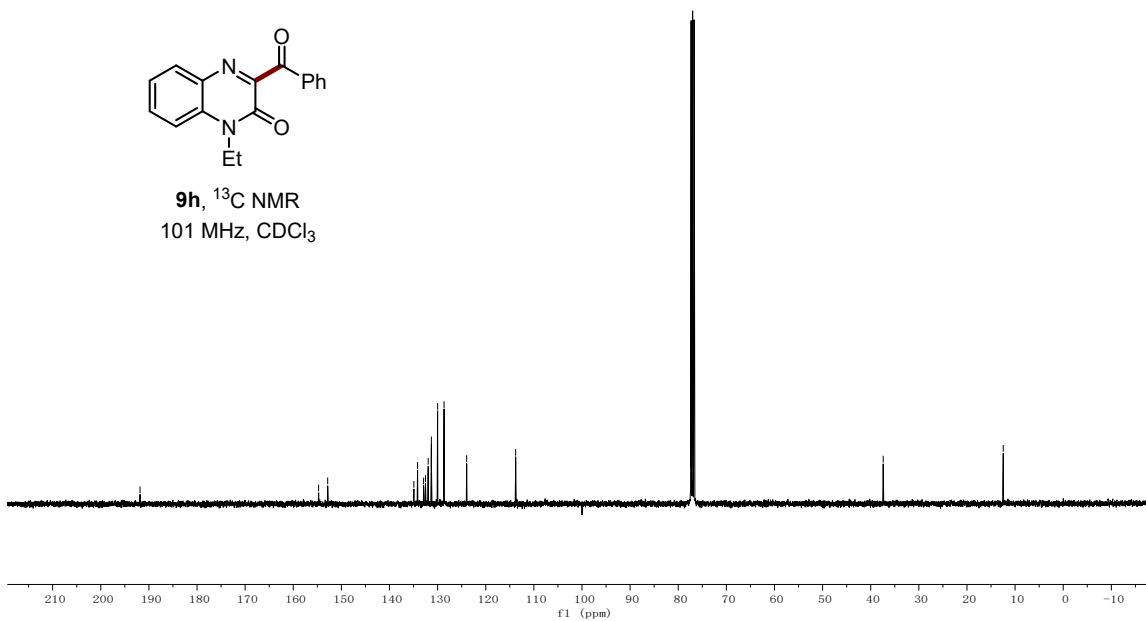

8.03  
8.03  
8.01  
8.01  
7.94  
7.94  
7.93  
7.92  
7.92  
7.66  
7.66  
7.65  
7.65  
7.64  
7.64  
7.63  
7.62  
7.62  
7.61  
7.57  
7.56  
7.56  
7.55  
7.55  
7.54  
7.54  
7.53  
7.52  
7.52  
7.52  
7.50  
7.50  
7.50  
7.49  
7.49  
7.48  
7.48  
7.38  
7.38  
7.36  
7.36  
7.36  
7.35  
7.34  
7.34  
7.34  
7.34  
7.33  
7.33  
7.32  
7.32  
7.31  
7.31  
7.30  
7.30  
7.29  
7.29  
7.29  
7.28  
7.28  
7.27  
7.27  
7.26  
7.26  
5.53

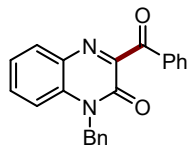

**9i**,  $^1\text{H}$  NMR  
400 MHz,  $\text{CDCl}_3$

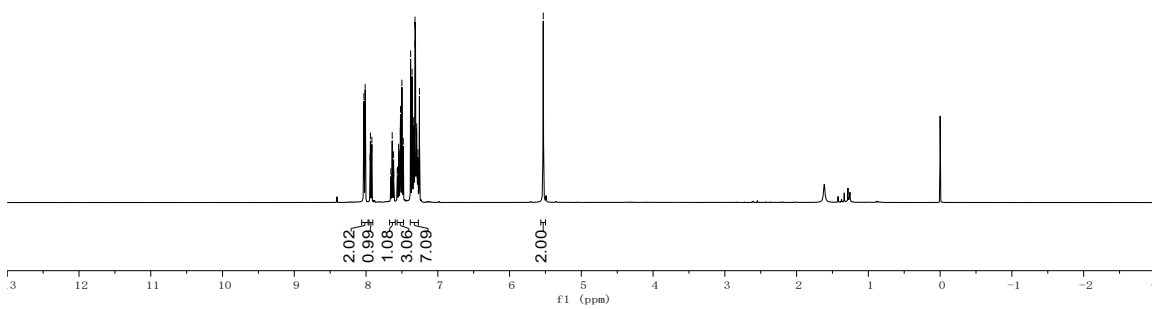

191.67  
154.80  
153.46  
134.90  
134.85  
134.25  
133.27  
132.50  
131.99  
131.15  
130.02  
129.04  
128.73  
127.94  
127.13  
124.23  
114.79  
-45.91

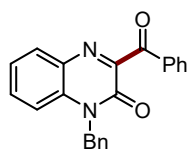

**9i**,  $^{13}\text{C}$  NMR  
101 MHz,  $\text{CDCl}_3$

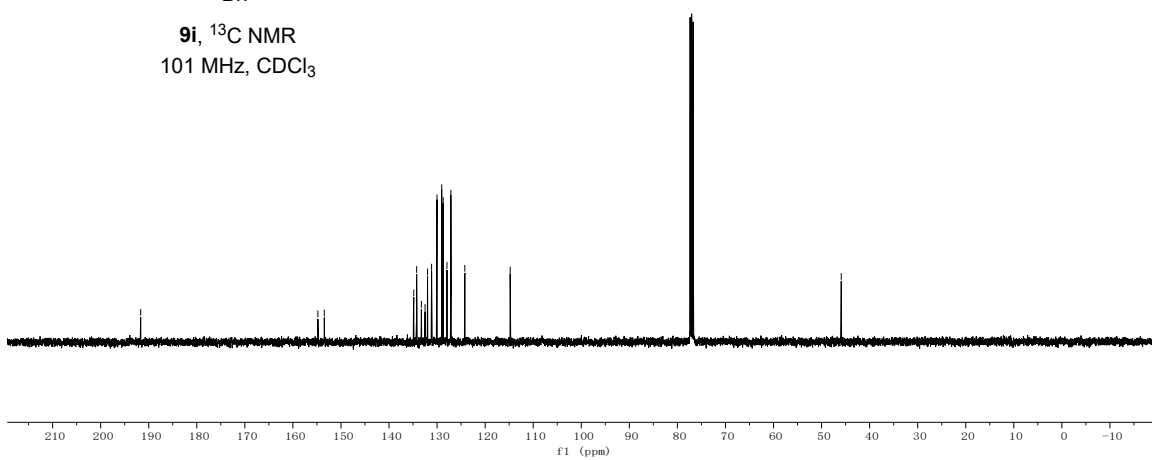

8.00  
7.99  
7.99  
7.98  
7.95  
7.94  
7.93  
7.92  
7.66  
7.64  
7.63  
7.62  
7.62  
7.61  
7.60  
7.50  
7.50  
7.48  
7.48  
7.47  
7.47  
7.42  
7.42  
7.41  
7.41  
7.40  
7.40  
7.39  
7.39  
7.38  
7.38  
7.38  
7.26  
5.96  
5.95  
5.93  
5.92  
5.34  
5.33  
5.31  
5.31  
5.29  
5.28  
5.24  
5.24  
4.96  
4.95  
4.94  
4.94

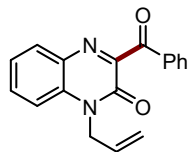

**9j**,  $^1\text{H}$  NMR  
400 MHz,  $\text{CDCl}_3$

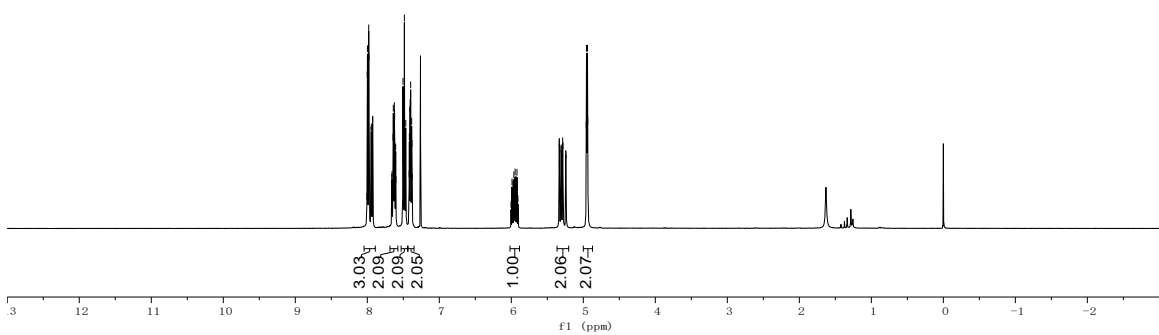

— 191.67

~ 154.72  
152.90  
134.89  
134.21  
133.18  
132.38  
131.92  
131.11  
130.31  
129.99  
128.69  
124.16  
118.80  
114.54

— 44.51

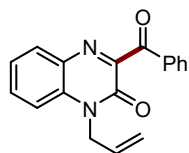

**9j**,  $^{13}\text{C}$  NMR  
101 MHz,  $\text{CDCl}_3$

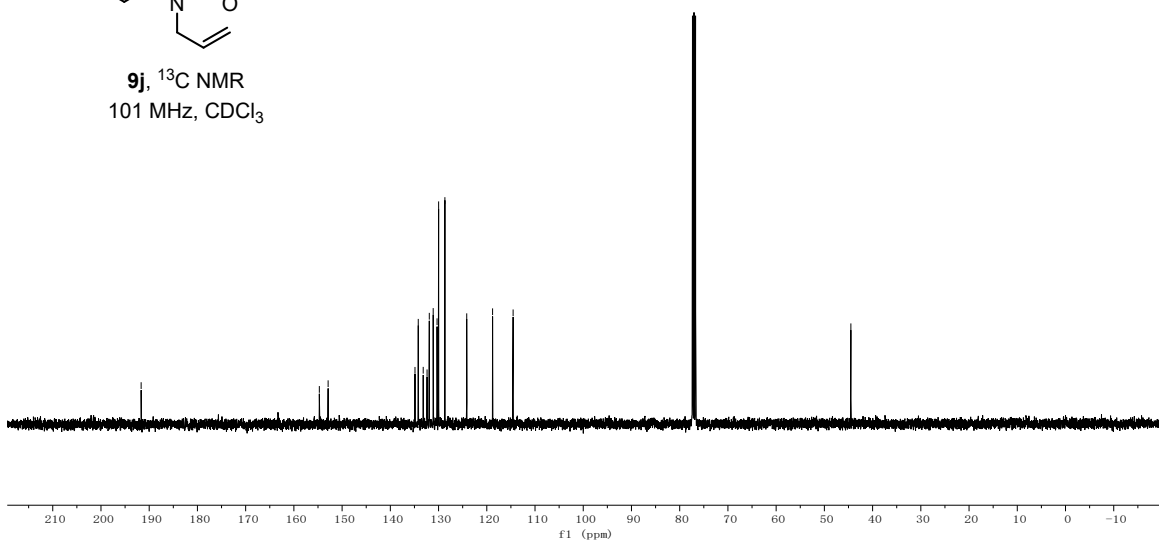

8.06  
8.04  
8.04  
8.04  
7.81  
7.81  
7.79  
7.79  
7.77  
7.77  
7.76  
7.75  
7.74  
7.74  
7.72  
7.72  
7.72  
7.62  
7.61  
7.60  
7.59  
7.59  
7.57  
7.55  
7.41  
7.38  
7.36  
7.34  
7.26

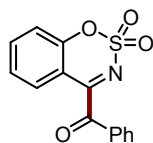

**9k**,  $^1\text{H}$  NMR  
400 MHz,  $\text{CDCl}_3$

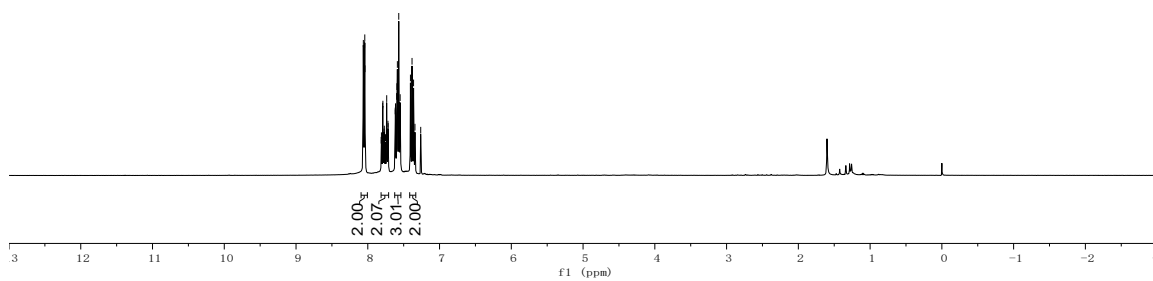

187.75  
171.64  
154.97  
138.12  
135.85  
133.07  
130.52  
129.95  
129.31  
126.28  
119.40  
114.12

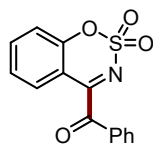

**9k**,  $^{13}\text{C}$  NMR  
101 MHz,  $\text{CDCl}_3$

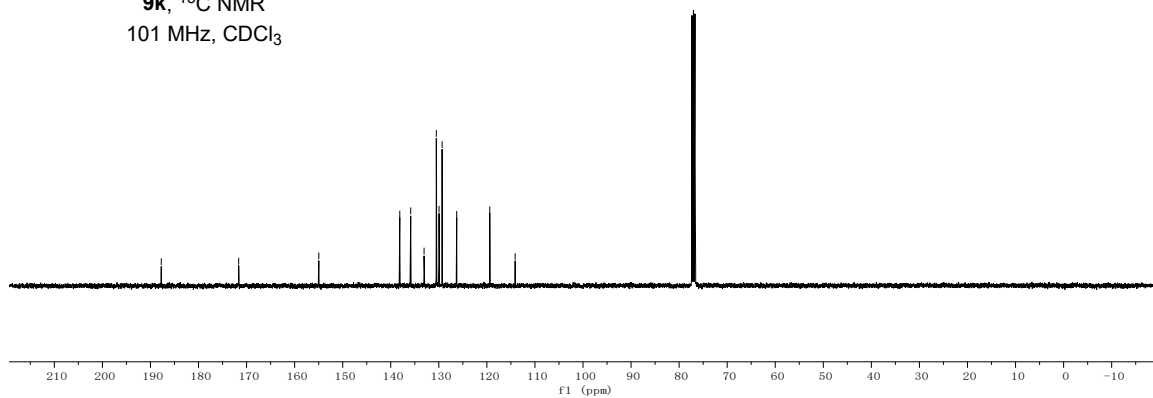

8.06  
8.05  
8.04  
8.03  
7.74  
7.74  
7.73  
7.72  
7.72  
7.71  
7.71  
7.70  
7.58  
7.56  
7.54  
7.48  
7.46  
7.26  
7.20  
7.16  
7.14

-2.51

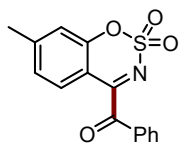

**9i**, <sup>1</sup>H NMR  
400 MHz, CDCl<sub>3</sub>

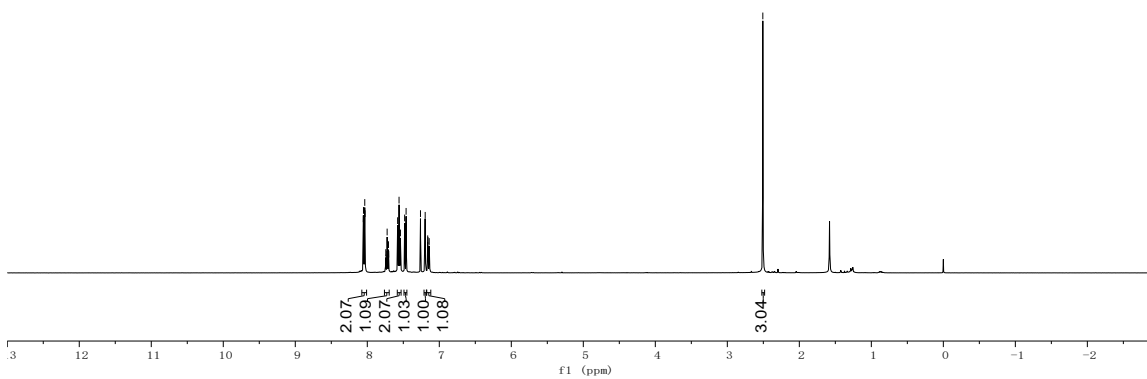

187.92  
171.54  
155.12  
151.07  
135.72  
133.16  
130.49  
129.67  
129.26  
127.27  
119.53  
111.80  
22.41

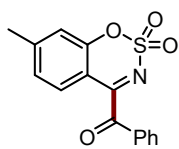

**9i**, <sup>13</sup>C NMR  
101 MHz, CDCl<sub>3</sub>

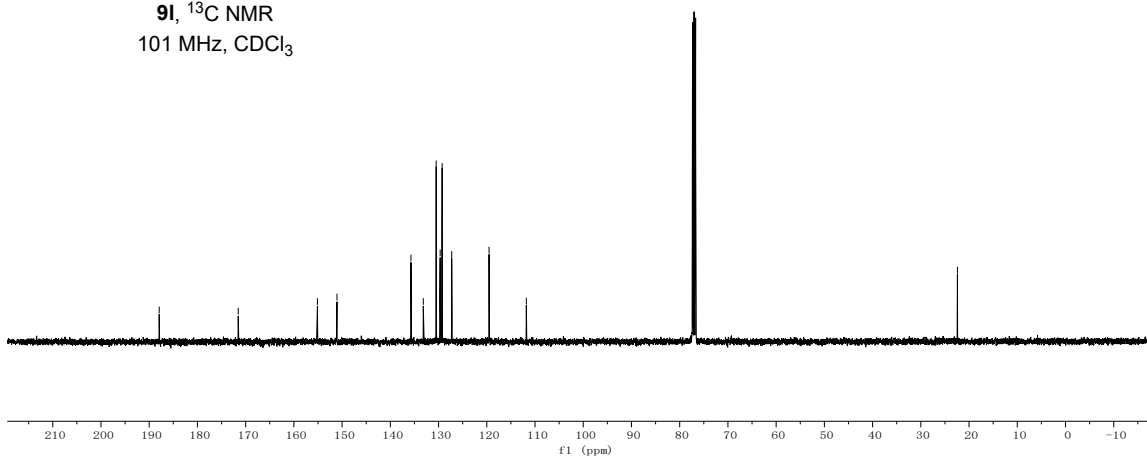

8.08  
8.07  
8.06  
8.05  
7.78  
7.77  
7.76  
7.75  
7.74  
7.74  
7.74  
7.61  
7.60  
7.59  
7.59  
7.58  
7.57  
7.57  
7.53  
7.53  
7.52  
7.51  
7.51  
7.50  
7.49  
7.49  
7.43  
7.42  
7.40  
7.39  
7.36  
7.36  
7.35  
7.34  
7.26

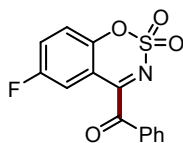

**9m**,  $^1\text{H}$  NMR  
400 MHz,  $\text{CDCl}_3$

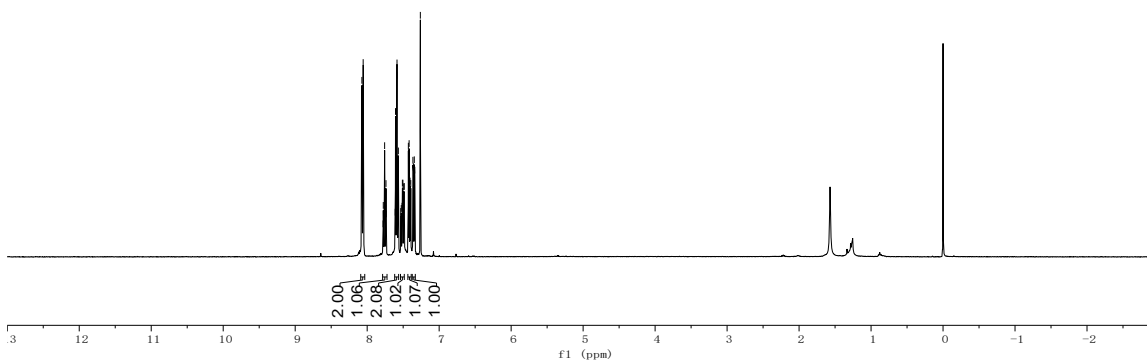

187.27  
170.14  
160.26  
157.78  
136.04  
136.01  
132.79  
130.62  
130.60  
129.36  
125.51  
125.27  
121.26  
121.18  
116.04  
115.79  
114.66  
114.57

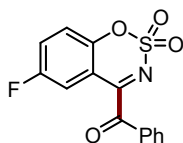

**9m**,  $^{13}\text{C}$  NMR  
101 MHz,  $\text{CDCl}_3$

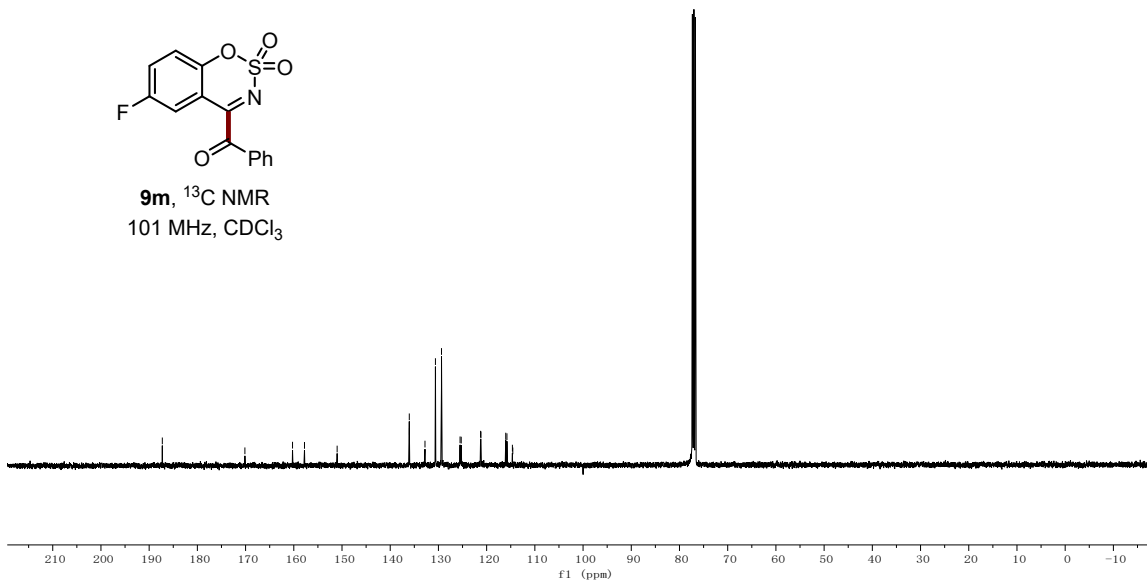

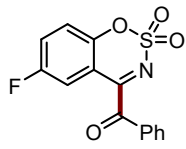

**9m**,  $^{19}\text{F}$  NMR  
376 MHz,  $\text{CDCl}_3$

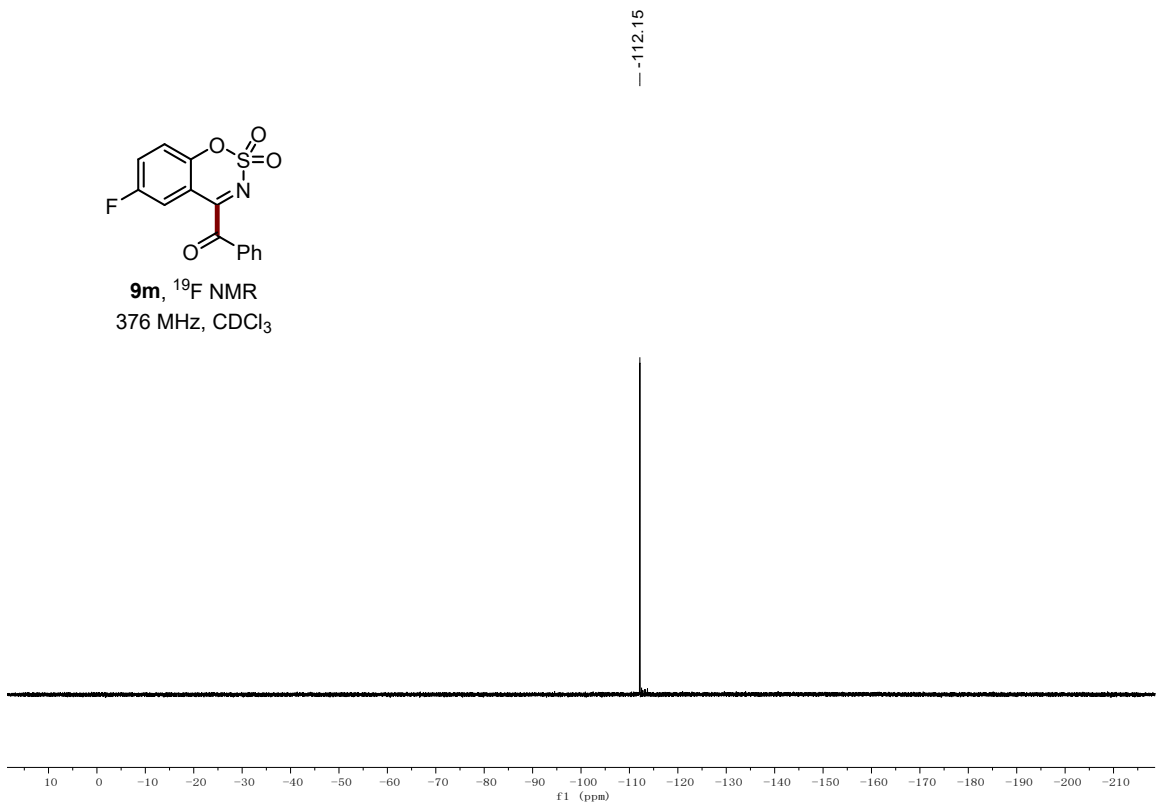



7.99  
7.98  
7.98  
7.97  
7.97  
7.96  
7.93  
7.93  
7.91  
7.91  
7.63  
7.61  
7.60  
7.59  
7.59  
7.58  
7.57  
7.56  
7.56  
7.50  
7.48  
7.48  
7.47  
7.47  
7.46  
7.46  
7.45  
7.45  
7.41  
7.41  
7.40  
7.40  
7.39  
7.39  
7.38  
7.26  
7.09  
7.09  
7.08  
7.07  
7.07  
7.05  
7.05  
7.03  
7.03  
4.54  
4.50  
4.49  
4.49  
4.48  
4.48  
4.47  
4.47  
4.44  
4.44  
3.59  
3.59  
2.44  
2.44  
1.83  
1.83  
1.41  
1.41  
0.89  
0.89

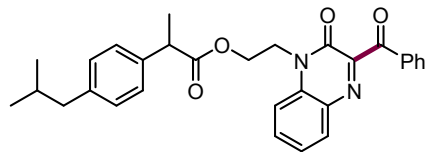

**9n**,  $^1\text{H}$  NMR  
400 MHz,  $\text{CDCl}_3$

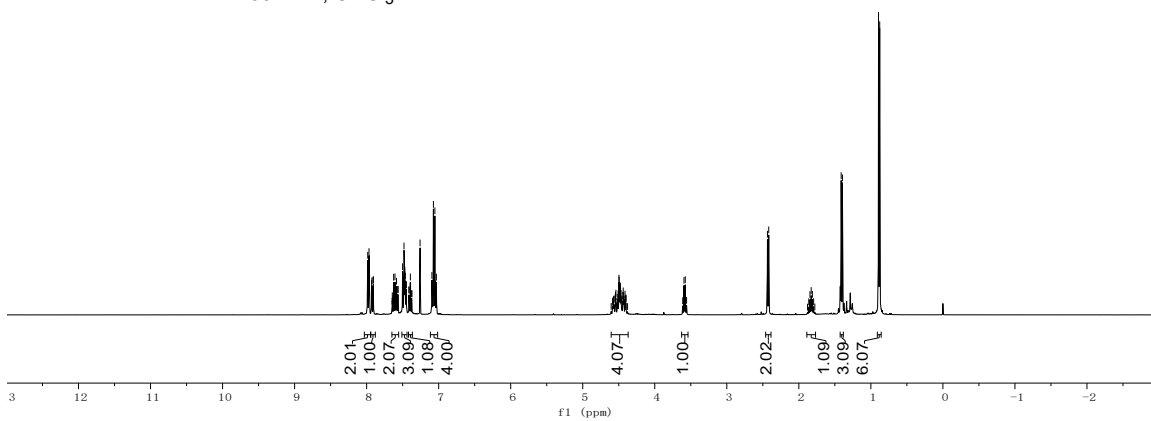

191.55  
174.73  
154.43  
153.18  
140.73  
137.13  
134.82  
134.27  
133.48  
132.33  
132.05  
131.21  
130.04  
129.40  
128.70  
127.08  
124.24  
114.17  
60.96  
45.03  
44.97  
41.04  
30.16  
22.41  
18.36

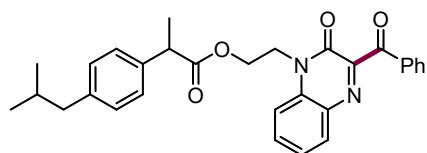

**9n**,  $^{13}\text{C}$  NMR  
101 MHz,  $\text{CDCl}_3$

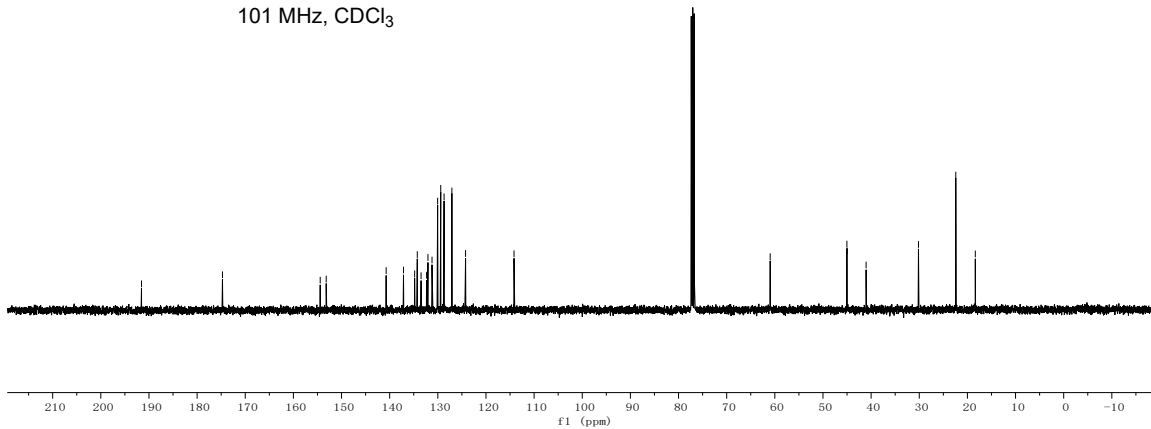

7.99  
7.99  
7.97  
7.97  
7.92  
7.92  
7.90  
7.62  
7.62  
7.60  
7.60  
7.60  
7.53  
7.53  
7.52  
7.51  
7.51  
7.51  
7.50  
7.49  
7.49  
7.47  
7.46  
7.46  
7.46  
7.45  
7.44  
7.44  
7.43  
7.42  
7.42  
7.40  
7.39  
7.38  
7.38  
7.36  
7.36  
7.35  
7.35  
7.33  
7.31  
7.26  
7.03  
7.02  
7.01  
7.00  
6.99  
6.99  
6.96  
6.96  
4.55  
4.53  
4.52  
4.50  
3.65  
3.63  
1.46  
1.44

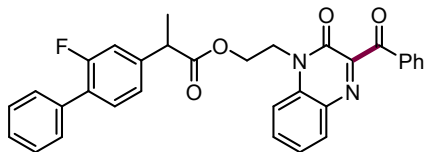

**9o**,  $^1\text{H}$  NMR  
400 MHz,  $\text{CDCl}_3$

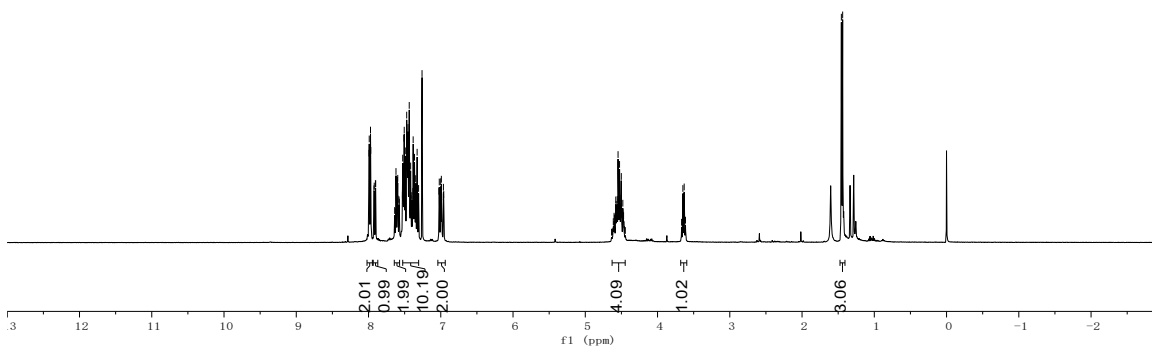

— 191.51  
— 173.95  
154.41  
153.20  
141.18  
141.11  
135.33  
134.79  
134.29  
133.43  
132.32  
132.01  
131.30  
130.88  
130.84  
130.04  
128.94  
128.91  
128.71  
128.47  
128.02  
127.88  
127.73  
124.30  
123.48  
123.45  
115.30  
115.07  
113.97  
61.26  
44.85  
41.03  
— 18.21

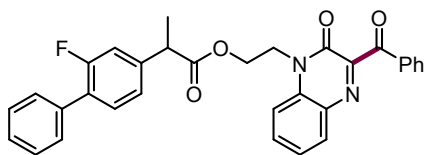

**9o**,  $^{13}\text{C}$  NMR  
101 MHz,  $\text{CDCl}_3$

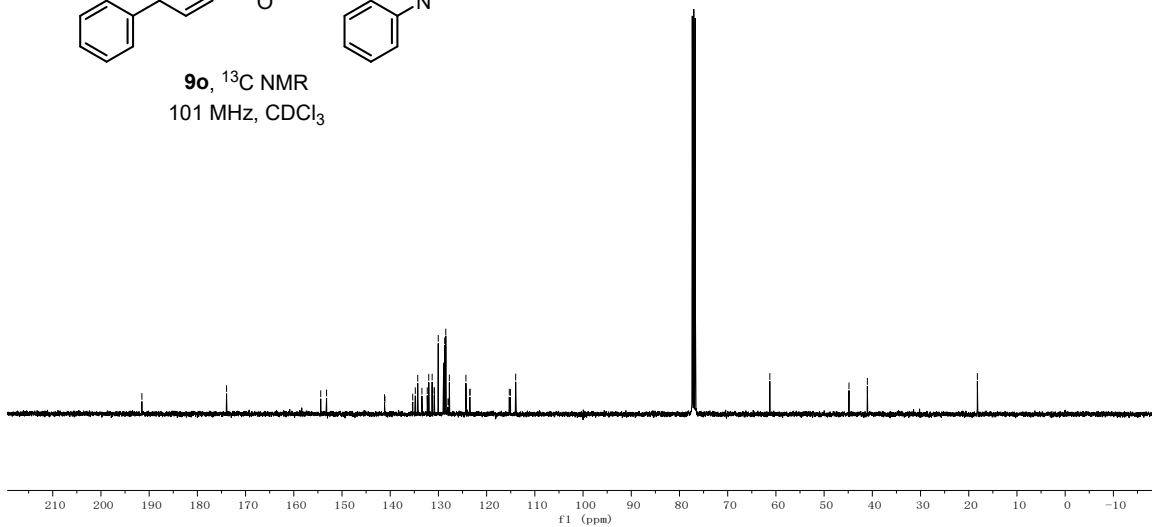

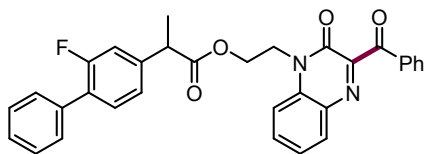

**9o**,  $^{19}\text{F}$  NMR  
376 MHz,  $\text{CDCl}_3$

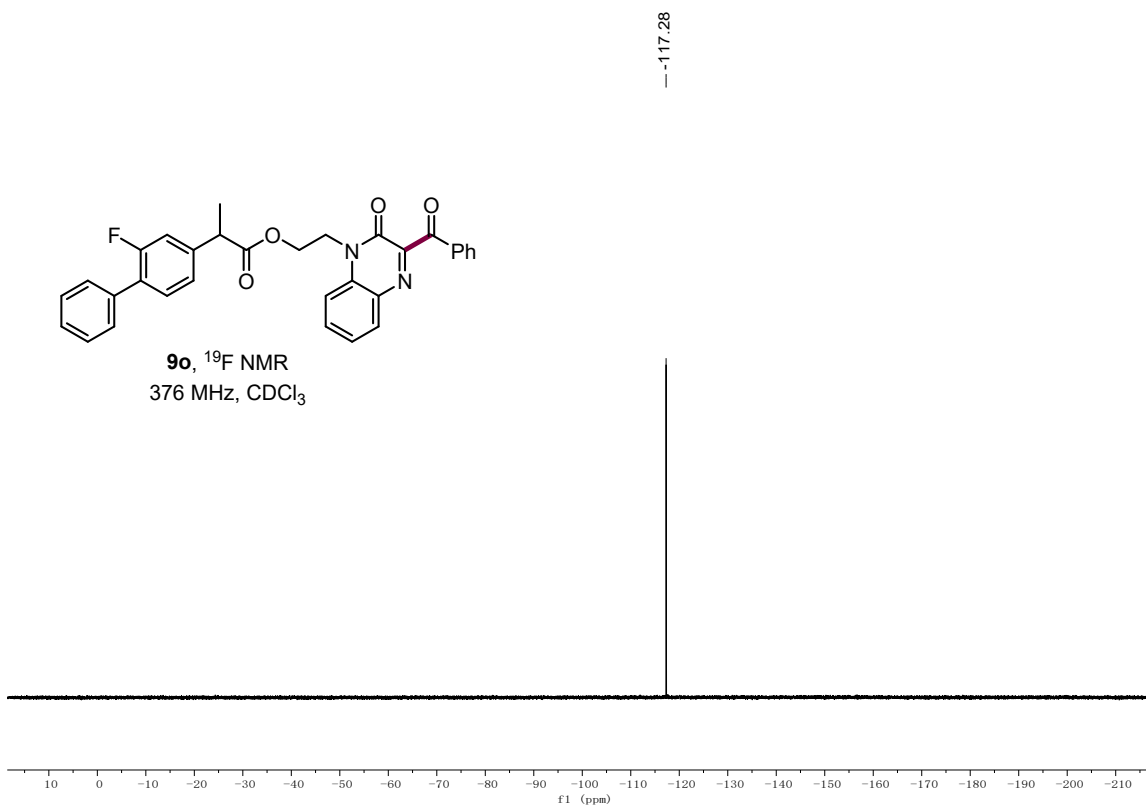

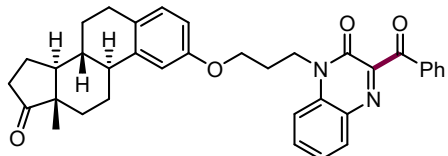

**9p**,  $^1\text{H}$  NMR  
400 MHz,  $\text{CDCl}_3$

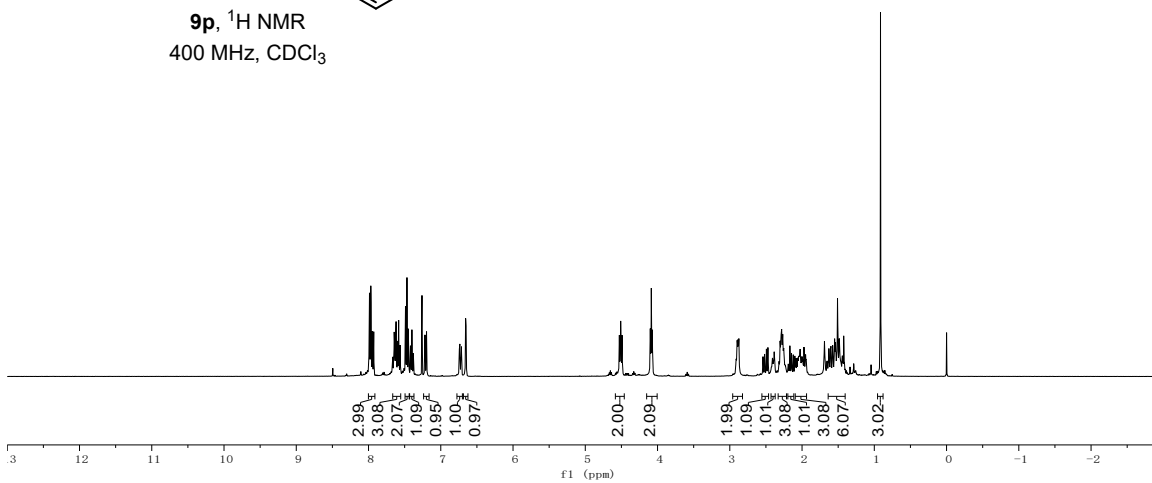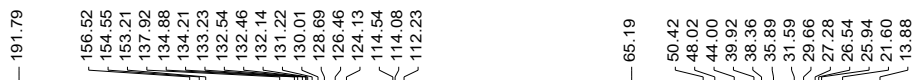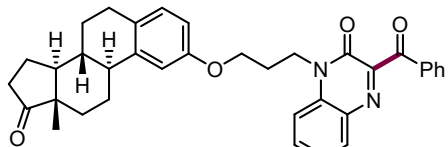

**9p**,  $^{13}\text{C}$  NMR  
101 MHz,  $\text{CDCl}_3$

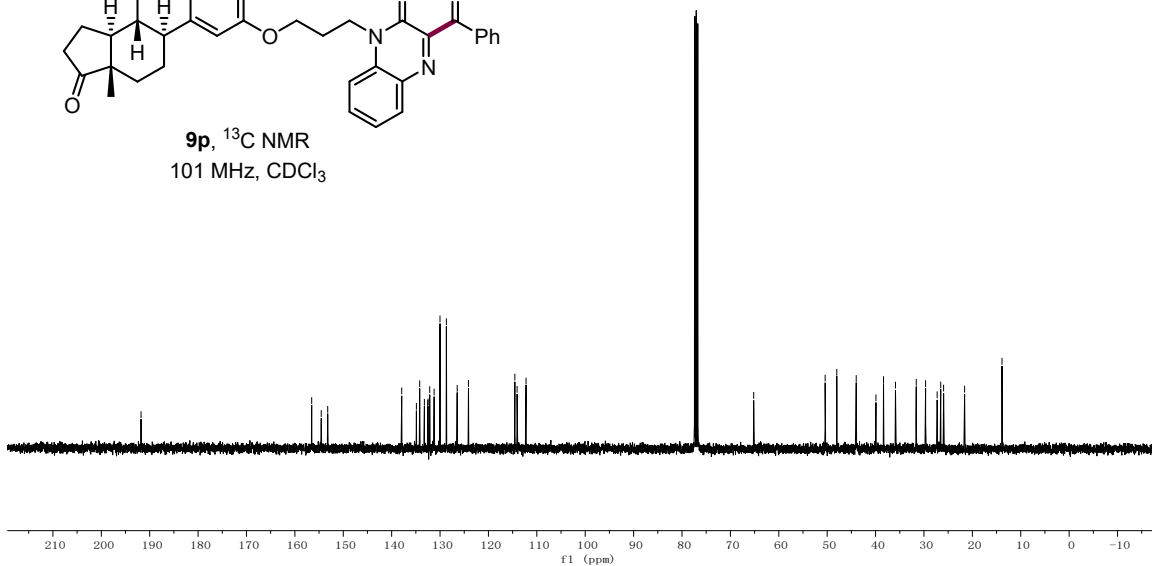

8.03  
8.01  
8.01  
7.93  
7.91  
7.91  
7.64  
7.62  
7.54  
7.54  
7.53  
7.52  
7.52  
7.50  
7.50  
7.48  
7.37  
7.37  
7.36  
7.35  
7.33  
7.31  
7.29  
7.27  
7.26  
5.52  
4.63  
4.60  
4.37  
4.34  
4.34  
3.15  
3.14  
1.63  
1.63  
1.62  
1.60  
1.59  
1.29  
1.29  
1.28  
1.27  
1.27  
1.26  
1.26  
1.26  
0.97  
0.94  
0.93  
0.91  
0.90  
0.88  
0.87  
0.86  
0.82  
0.69  
0.67

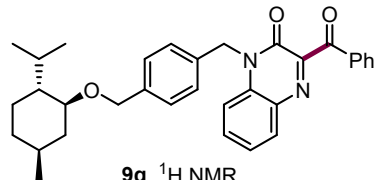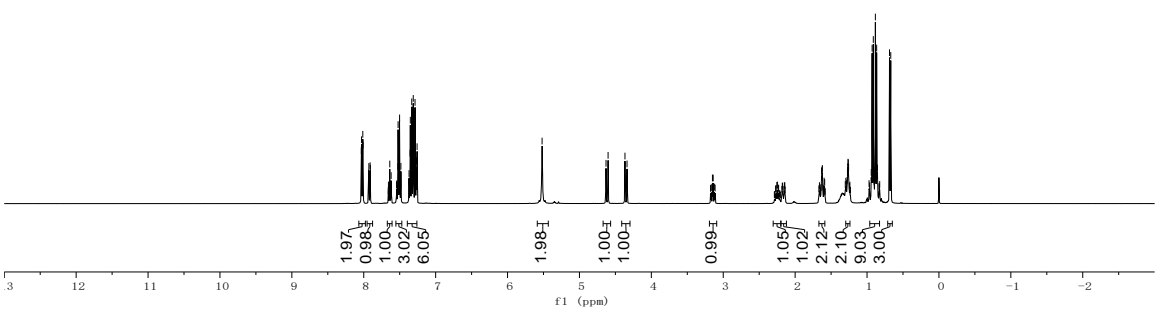

191.70  
154.78  
153.46  
139.02  
134.88  
134.26  
133.98  
133.18  
132.48  
131.96  
131.10  
130.03  
128.73  
128.51  
127.14  
124.22  
114.89  
78.95  
69.99  
48.29  
45.72  
40.30  
34.54  
31.56  
25.53  
23.22  
22.37  
21.02  
16.06

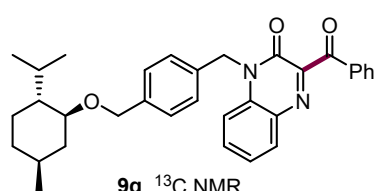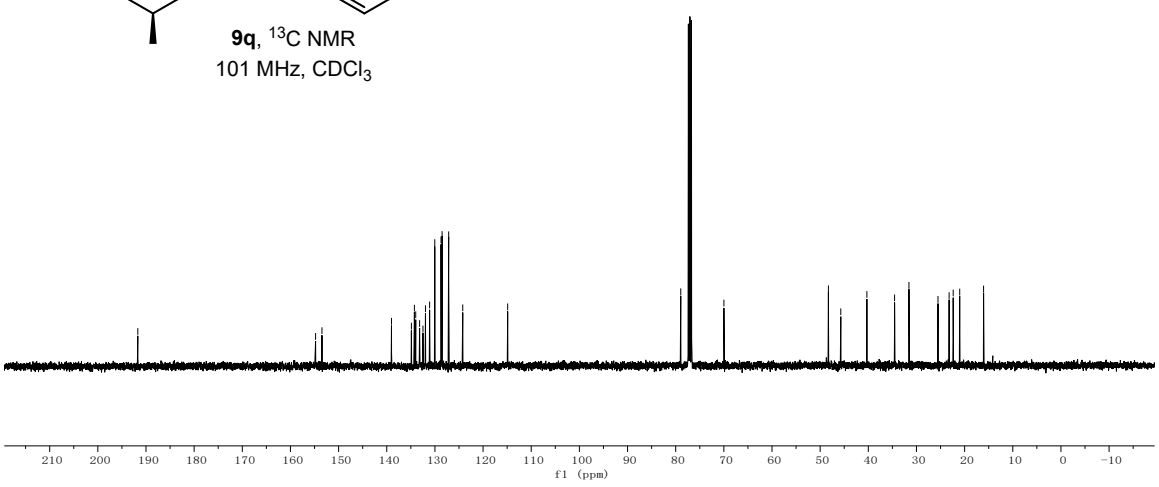

8.02  
8.01  
8.00  
7.99  
7.98  
7.92  
7.92  
7.90  
7.88  
7.88  
7.66  
7.65  
7.65  
7.64  
7.64  
7.63  
7.62  
7.62  
7.61  
7.60  
7.60  
7.60  
7.57  
7.57  
7.55  
7.55  
7.50  
7.50  
7.48  
7.48  
7.46  
7.39  
7.39  
7.38  
7.38  
7.37  
7.36  
7.36  
7.36  
7.35  
7.35  
7.31  
7.31  
7.29  
7.28  
7.28  
6.99  
6.97  
5.18  
4.59  
4.58  
4.58  
4.56  
4.54  
4.52  
4.52  
4.51  
4.51  
3.56

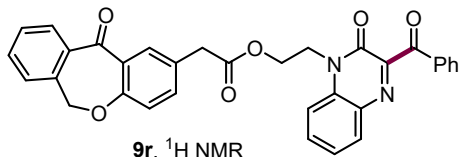

**9r**,  $^1\text{H}$  NMR  
400 MHz,  $\text{CDCl}_3$

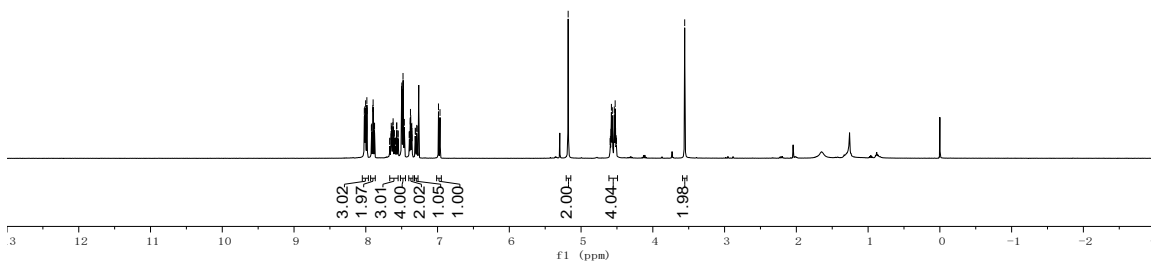

191.57  
190.76  
171.44  
160.56  
154.44  
153.26  
140.40  
136.33  
135.54  
134.83  
134.30  
133.44  
132.86  
132.44  
132.36  
132.16  
131.32  
130.07  
129.50  
129.31  
128.72  
127.86  
127.09  
125.12  
124.34  
121.19  
113.91  
73.64  
61.12  
41.05  
39.92

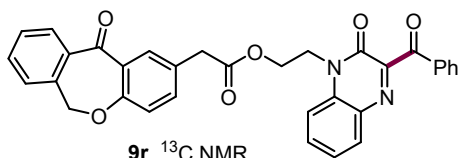

**9r**,  $^{13}\text{C}$  NMR  
101 MHz,  $\text{CDCl}_3$

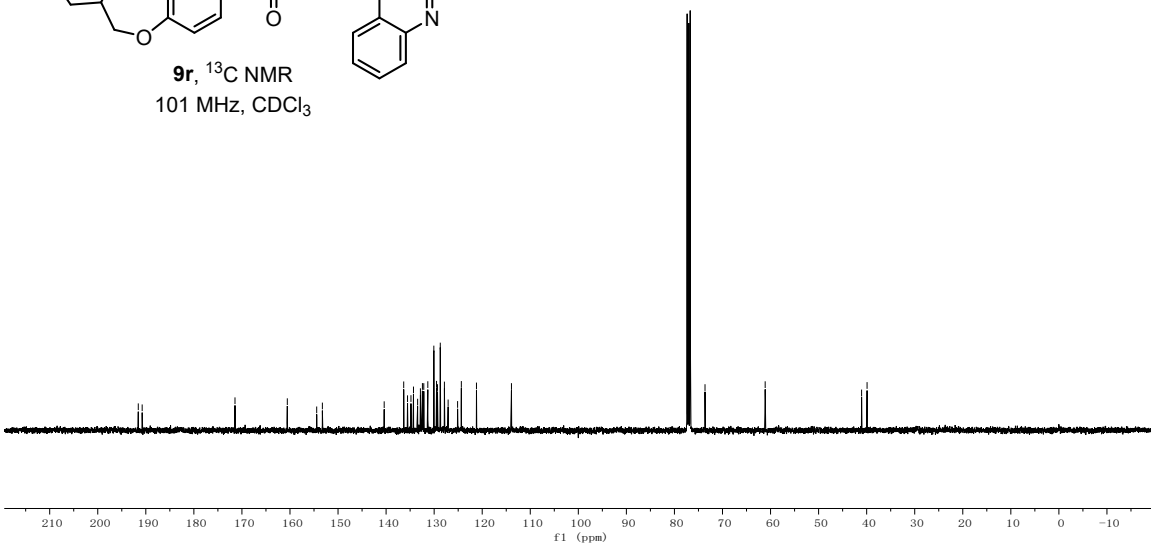

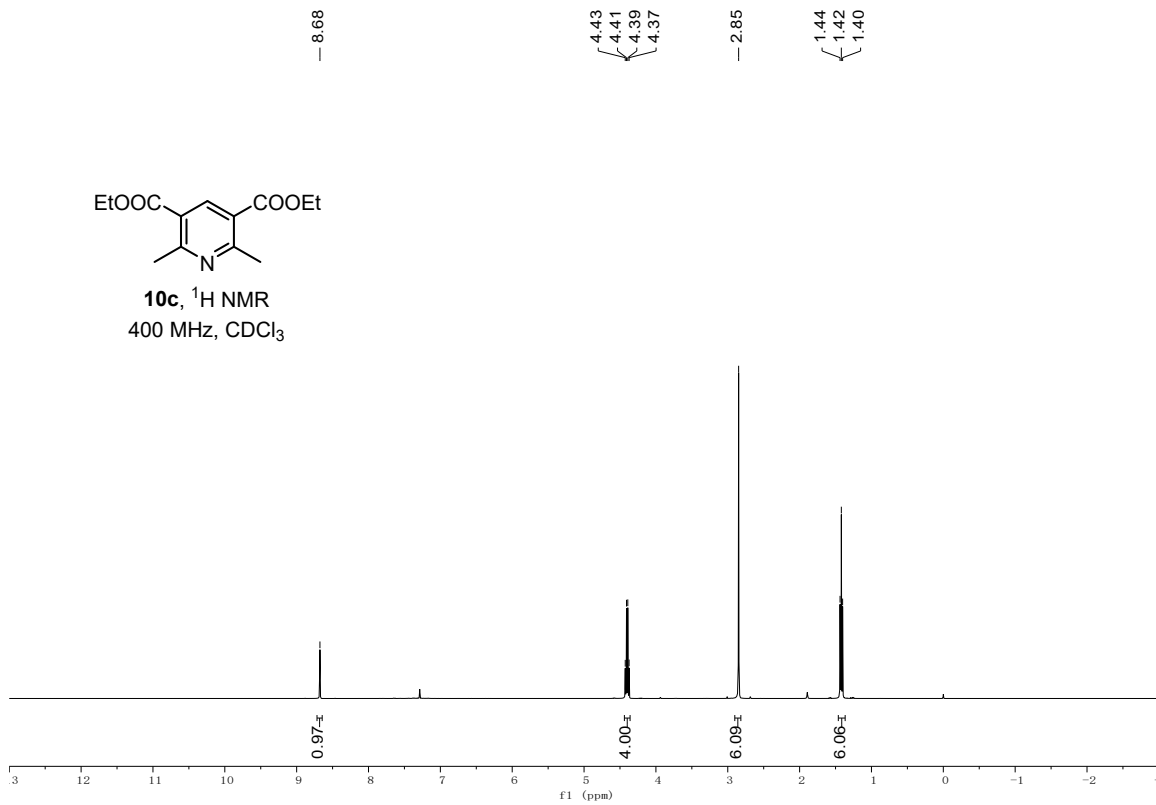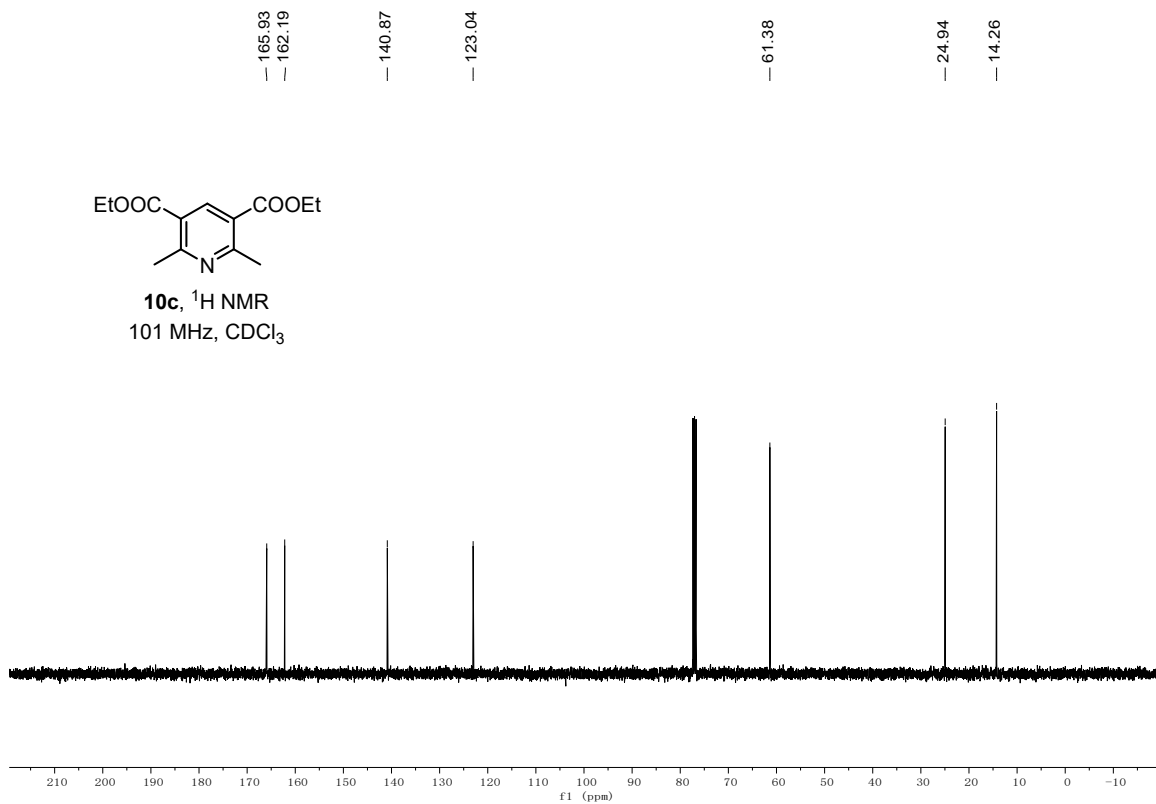

## 5. Reference

1. J. Xu, F. Zhang, S. Zhang, L. Zhang, X. Yu, J. Yan and Q. Song, *Org. Lett.*, 2019, **21**, 1112.
2. H.-L. Zhu, F.-L. Zeng, X.-L. Chen, K. Sun, H.-C. Li, X.-Y. Yuan, L.-B. Qu and B. Yu, *Org. Lett.*, 2021, **23**, 2976.
3. K. Sun, S.-J. Li, X.-L. Chen, Y. Liu, X.-Q. Huang, D.-H. Wei, L.-B. Qu, Y.-F. Zhao and B. Yu, *Chem. Commun.*, 2019, **55**, 2861.
4. S.-M. Xu, J.-Q. Chen, D. Liu, Y. Bao, Y.-M. Liang and P.-F. Xu, *Org. Chem. Front.*, 2017, **4**, 1331.
5. H. Wang, L.-N. Guo and X.-H. Duan, *Adv. Synth. Catal.*, 2013, **355**, 2222.
6. L.-Y. Xie, Y.-S. Bai, X.-Q. Xu, X. Peng, H.-S. Tang, Y. Huang, Y.-W. Lin, Z. Cao and W.-M. He, *Green Chem.*, 2020, **22**, 1720.
7. X. Zhao, B. Li and W. Xia, *Org. Lett.*, 2020, **22**, 1056.
8. a) B. Bieszczad, L. A. Perego and P. Melchiorre, *Angew. Chem. Int. Ed.*, 2019, **58**, 16878. b) F. L. Zeng, K. Sun, X. L. Chen, X. Y. Yuan, S. Q. He, Y. Liu, Y. Y. Peng, L. B. Qu, Q. Y. Lv and B. Yu, *Adv. Synth. Catal.*, 2019, **361**, 5176.
